# Supplementary material
Source: publisher figshare collection journal article supplement (https://brill.figshare.com/articles/dataset/_/5441608)
Supplement: Supplementary file 1 [file 1]

## References

- Aba ZQZW, Sichuan SWKY, Chengdu SWKY, Maerkang XWXB, Aba ZW [阿坝藏族羌族自治州文物管理所, 四川省文物考古研究院, 成都文物考古研究所, 马尔康县文化体育局]. 2007. *A brief report on the investigation of the site of Haxiu, Ma'erkang County, Sichuan Province* [四川马尔康县哈休遗址调查简报]. *Sichuan Wenwu* [四川文物]. 2007(4): 8-16. [in Chinese].
- Ahn, Sung-Mo. 2010. The emergence of rice agriculture in Korea: archaeobotanical perspectives. *Archaeological and Anthropological Sciences* 2: 89–98.
- Aikens, C. Melvin and Gyoung-Ah Lee. 2014. Postglacial inception and growth of anthropogenic landscapes in China, Korea, Japan, and the Russian Far East. *Anthropocene* 4: 46-56.
- Albrecht, Gerd, Miriam Noel Haidle, Chhor Sivleng, Heang Leang Hong, Heng Sophady, Heng Than, Mao Someaphyvath, Sirik Kada, Som Sophal, Thuy Chanthourn and Vin Laychour. 2001. Circular earthwork Krek 52/62: recent research on the prehistory of Cambodia. *Asian Perspectives* 39 (1-2): 20-46
- Barton, Loukas. 2009. *Early Food Production in China's Western Loess Plateau*. PhD Dissertation, University of California, Davis.
- Barton, Loukas, Seth D. Newsome, Fa-Hu Chen, Hui Wang, Thomas P. Guilderson and Robert L. Bettinger 2009. Agricultural origins and the isotopic identity of domestication in northern China. *Proceedings of the National Academy of Sciences U.S.A.* 106(14): 5523-5528.
- Bellwood, Peter. 2006. Asian farming diasporas? Agriculture, languages and genes in China and Southeast Asia. In Miriam T. Stark (ed.) *Archaeology of Asia*. Oxford. Blackwell.
- Bellwood, Peter. 2007. *Prehistory of the Indo-Malaysian Archipelago*. Canberra: ANU Press.
- Bestel, Sheahan, Gary W Crawford, Li Liu, Jinming Shi, Yanhua Song and Xingcan Chen. 2014. The Evolution of Millet Domestication, Middle Yellow River Region, North China: Evidence from Charred Seeds at the Late Palaeolithic Shizitan S9 Site. *The Holocene* 24(3): 261-265.
- Bettinger, Robert L., Loukas Barton and Robert G. Elston. 2005. *Report on 2002 archaeological fieldwork in Gansu and Ningxia provinces, PRC*. <http://www.anthro.ucdavis.edu/card/usprc/publications.htm>.
- Chen, Fa-hu, Guanghui Dong, Dongju Zhang, Xinyi Liu, Xia Jia, Chengbang An and Martin K. Jones. 2015. Agriculture facilitated permanent human occupation of the Tibetan Plateau after 3600 BP. *Science* 347(6219): 248-250.
- Chen, Wenhua. 1994. *Zhongguo Nongye Kaogu Tulu (Atlas of Agricultural Archaeology in China)*. Nancheng: Jiangxi Press of Science and Technology. [In Chinese].
- Chen, Xingcan. 1999. On the earliest evidence for rice cultivation in China. *Bulletin of the Indo-Pacific Prehistory Association* 18(2): 81-93.
- Chen, Xuexiang [陈雪香]. 2007. Analysis of flotation samples from Neolithic sites in the Rizhao area of Shandong Province [山东日照两处新石器时代遗址浮选土样结果分析]. *Nanfang Wenwu* [南方文物] 1: 92-94. [in Chinese].
- Cheng, Zhijie, Yuzhang Yang, Juzhong Zhang, Fang Fang, Jie Yu, Bingbai Chen, Changfu Chen, Hui Zhang and Xicheng Gong. 2016. The study of charred plant remains from the site of Xiaoganggang, Huainan City, Anhui. [淮安徽南小孙岗遗址炭化植物遗存研究]. *Quaternary Sciences* [第四纪研究] 36(2): 302-311. [in Chinese].
- Choe, Chong-Pil and Martin T. Bale. 2002. Current perspectives on settlement, subsistence, and cultivation in prehistoric Korea. *Artic Anthropology* 39(1-2): 95-121.
- CPAM (Commission for the Preservation of Ancient Monuments, Tibet) and Sichuan University Department of History. 1985. [西藏自治区文物管理委员会四川大学历史系]. *Karou: A Neolithic Site in Tibet* [昌都卡若]. Beijing: IACASS.
- Crawford, Gary, W. 1992. Prehistoric plant domestication in East Asia. In C. Wesley, Cowan and Patty Jo Watson (eds) *The Origins of Agriculture: An International Perspective*, 7-38. Washington and London: Smithsonian Institution Press

- Crawford, Gary W. and Chen Shen. 1998. The origins of rice agriculture: Recent progress in East Asia. *Antiquity* 72(278): 858-866.
- Crawford, Gary W, and Gyoung-Ah Lee. 2003. Agricultural origins in the Korean peninsula. *Antiquity* 77(295): 87-95.
- Crawford, Gary, Anne Underhill, Zhijun Zhao, Gyoung-Ah Lee, Gary Feinman, Linda Nicholas, Fengshi Luan, Haiguang Yu, Hui Fang and Fengshu Cai. 2005. Late Neolithic plant remains from Northern China: Preliminary results from Liangchengzhen, Shandong. *Current Anthropology* 46(2): 309-317.
- Crawford, Gary W, Xuexiang Chen [陳雪香], and Jianhua Wang [王建华]. 2006. Carbonised rice from the Houli Culture site of Yuezhuang, Changqing, Jinan, Shandong [山东济南长清区月庄遗址发现后李文化时期的炭化稻]. *Dongfang Kaogu [东方考古] East Asia Archaeology* 3: 247–251. [in Chinese].
- Crawford, Gary W, Xuexiang Chen, Fengshi Luan and Jianhua Wang. 2016. People and plant interaction at the Houli Culture Yuezhuang site in Shandong Province, China. *The Holocene* 26(10), 1594-1604.
- d'Alpoim Guedes, Jade. 2011. Millets, rice, social complexity, and the spread of agriculture to the Chengdu Plain and southwest China. *Rice* 4: 104-113.
- d'Alpoim Guedes, Jade and Ethan E. Butler. 2014. Modelling constraints on the spread of agriculture to Southwest China with thermal niche models. *Quaternary International* 349: 29-41.
- d'Alpoim Guedes, Jade, Ming Jiang, Kunyu He, Xiaohong Wu and Zhanghua Jiang. 2013. Site of Baodun yields the earliest evidence for the spread of rice and foxtail millet agriculture to southwest China. *Antiquity* 87: 758-771.
- D'Alpoim Guedes, Jade, Hongliang Lu, Yongxian Li, Robert N. Spengler, Xiaohong Wu and Mark S. Aldenderfer. 2014b. Moving agriculture onto the Tibetan plateau: the archaeobotanical evidence. *Archaeological and Anthropological Sciences* 6: 255-269.
- d'Alpoim Guedes, Jade, Guiyun Jin and R. Kyle Bocinsky. 2015. The impact of climate on the spread of rice to north-eastern China: A new look at the data from Shandong Province. *PLoS ONE* 10(6): e0130430. doi:10.1371/journal.pone.0130430.
- D'Andrea A. Catherine, Gary Crawford, Masakazu Yoshizaki and Takehisa Kudo. 1995. Late Jomon cultigens in northeastern Japan. *Antiquity* 69: 146-152.
- D'Andrea A. Catherine. 1995. Later Jomon subsistence in Northeastern Japan: new evidence from palaeoethnobotanical studies. *Asian Perspectives* 34(2): 195-227.
- Dal Martello, Rita, Rui Min, Chris Stevens, Charles Higham, Tom Higham, Ling Qin and Dorian Q Fuller. In prep. Early agriculture at the crossroads of China and Southeast Asia: archaeobotanical evidence and radiocarbon dates from Baiyangcun, Yunnan.
- Debaine-Francfort, Corinne. 1988. Archéologie du Xinjiang des origines aux Han. Première partie. *Paleorient* 14(1): 5-29.
- Deng, Zhenhua, Ling Qing, Yu Gao, Alison Ruth Weisskopf, Chi Zhang, and Dorian Q Fuller. 2015. From early domesticated rice of the Middle Yangtze basin to millet, rice and wheat agriculture: archaeobotanical macro-remains from Baligang, Nanyang basin, Central China (6700-500 BC). *PLoS ONE*: 10(10): e0139885. doi:10.1371/journal.pone.0139885.
- Ding, Pin [丁品], Ye Zhao [赵晔], Yunfei Zheng [郑云飞], Wenbao Lu [陆文宝], Zhaobing Zhong [仲召兵], and Xugao Chen [陈旭高]. 2011. The Most Important Discovery of the second and third excavation seasons at the prehistoric Maoshan settlement in Yuhang, Zhejiang [浙江余杭茅山史前聚落遗址第二、三期发掘取得重要收获]. *Zhongguo Wenwu Bao [中国文物报] China Cultural Relics News* December 30. Beijing.
- Do, Yuho and Gideog Hwang. 1961. *Excavation Report of Jitap-ri Ancient Site*. Pyongyang: Institute of Science.
- Dodson, John, R., Xiaoqiang Li, Xinying Zhou, Keliang Zhao, Nan Sun, and Pia Atahan. 2013. Origin and spread of wheat in China. *Quaternary Science Reviews* 72: 108-111. [in Chinese].

- Dong, Guanghui, Xin Jia, Robert Elston, Fahu Chen, Shuicheng Li, Lin Wang L, Linhai Cai and Chengbang An. 2013. Spatial and temporal variety of prehistoric human settlement and its influencing factors in the upper Yellow River valley, Qinghai Province, China. *Journal of Archaeological Science* 40: 2538-2546.
- Flad, Rowan, Shuicheng Li, Xiaohong Wu and Zhijun Zhao. 2010. Early wheat in China: Results from new studies at Donghuishan in the Hexi Corridor. *The Holocene* 20(6): 955-965.
- Frachetti, Michael D., Robert N. Spengler, Gayle J. Fritz and Alexei N. Mar'yashev. 2010. Earliest direct evidence for broomcorn millet and wheat in the central Eurasian steppe region. *Antiquity* 84: 993-1010.
- Fujian Provincial Museum [福建博物院] and Tanshishan Site Museum [昙石山遗址博物馆]. 2010. A short report on the 2004 excavations at Tanshishan, Minhou County [闽侯昙石山遗址 2004 年考古发掘简报]. *Fujian Wenbo* [福建文博] 2010(1): 1-12. [in Chinese].
- Fuller, Dorian and Ling Qin. 2009. Water management and labour in the origins and dispersal of Asian rice. *World Archaeology* 41(1): 88-111.
- Fuller, Dorian Q and Ling Qin (unpublished) Botanical work on material from the site of Huitupo.
- Fuller, Dorian Q and Hai Zhang. 2007. A preliminary report of the survey archaeobotany of the Upper Ying Valley (Henan Province), In School of Archaeology and Museology, Peking University and Henan Provincial Institute of Cultural Relics and Archaeology (eds) *Dengfeng wangchenggang yizhi de faxian yu yanjiu (2002-2005)* [Archaeological Discovery and Research at the Wangchenggang Site in Dengfeng (2002-2005)], 916-958. Zhengzhou: Great Elephant Publisher. [in Chinese].
- Fuller, Dorian Q, Ling Qin, Yunfei Zheng, Zhijun Zhao, Xugao Chen, Leo Aoi Hosoya and Guo-Ping Sun. 2009. The Domestication Process and Domestication Rate in Rice: Spikelet Bases from the Lower Yangtze. *Science* 323(5921): 1607-1610.
- Fuller, Dorian Q, Tim Denham, Manuel Arroyo-Kalin, Leilani Lucas, Chris J. Stevens, Ling Qin, Robin G. Allaby, and Michael D. Purugganan. 2014. Convergent evolution and parallelism in plant domestication revealed by an expanding archaeological record. *Proceedings of the National Academy of Sciences U.S.A.* 111(17): 6147-6152.
- Furuta, Masataka. 1972. Kureishibaru iseki: Jomon banki noko seisan bunka no shiso. In *Hyakunin linkai Maizo Bunkazai Hokoku* 7: 1-72.
- Guangxi Zhuang Autonomous Region Archaeological Team (GZARAT) [广西那坡县感驮岩遗址发掘简报] and Napo County Museum (那坡县博物馆). 2003. A short report on excavations at Gantuoyan in Napo County, Guangxi [广西那坡县感驮岩遗址发掘简报]. *Kaogu* [考古] 2003(10): 899-920. [in Chinese].
- Han, Chang-kyun [한창균], Kim G-Y [김근완] and Jajin Koo [구자진]. 2003. *The Neolithic Site at Daecheon-ri, Okcheon-gun* [옥천 대천리 신석기유적]. Daejeon: Hannam University Central Museum [Daejeon]. [in Korean].
- Han, Yong [阚勇] and Yunnan Provincial Museum [云南省博物馆]. 1981. Baiyangcun site of Binchuan, Yunnan [云南宾川白羊村遗址]. *Kaogu Xuebao* [考古学报] 1981(3): 349-368.
- Hedges, Richard. E. M., Rupert A. Housley, Christopher Bronk Ramsey and Gert Jaap van Klinken. 1992. Radiocarbon dates from the oxford AMS system: Archaeometry datelist 14. *Radiocarbon* 34(1): 141-159.
- Henan Institute of Archaeology. 1999. *Wuyang Jiahu*. Beijing: Science. [in Chinese].
- Higham, Charles. 1989. *Archaeology of Mainland Southeast Asia: From 10,000 BC to the Fall of Angkor*. Cambridge: Cambridge University Press.
- Hubei Provincial Institute of Cultural Relics and Archaeology. 2001. Liulinxi Site at Zigui County, Hubei in 1998. *Chinese Archaeology* 1(1): 88-91. [Originally Published in Chinese. Translation by Li Xinwei and Jiao Tianlong]. Original text: Wang Fengzhu [王凤竹], Huang Wenxin [黄文新] and Luo Yunbing [罗运兵]. *考古* 2000(8): 697-706.

- Hudson, Mark. 1999. *Ruins of Identity: Ethnogenesis in the Japanese Islands*. Honolulu: University of Hawai'i Press.
- Hung, Hsiao-chun and Mike T. Carson. 2014. Foragers, fishers and farmers: origins of the Taiwanese Neolithic. *Antiquity* 88:115-1131.
- IA CASS. 2013. 9,000 year old Neolithic site confirmed in Longyu, Zhejiang (Trans. Su Minjie). *Kaogu* 2013-12-09: [http://www.kaogu.net.cn/en/News/New\\_discoveries/2013/1209/44684.html](http://www.kaogu.net.cn/en/News/New_discoveries/2013/1209/44684.html).
- Im, Hyo-jai. 1990. Archaeological research of Kimpo Peninsula. *Annual Bulletin of Seoul National University Museum* 2: 1-22. [in Korean].
- Imamura, Keiji. 1996. *Prehistoric Japan*. Honolulu: University of Hawai'i Press.
- Ji, Duxue [吉笃学]. 2009. Zhongguo Xibei diqu caiji jingji xiang nongye jingji guodu de keneng dongyin 中国西北地区采集经济向农业经济过渡的可能动因. *Kaogu yu Wenwu* 考古与文物 4: 36-47. [in Chinese].
- Jiang, Yuchao. 2011. *Hutuohe shangyou kagou diaocha chutu zhiwu yicun chubu yanjiu* [Preliminary Analysis of Plant Remains from Archaeological Regional Survey in the Upper Hutou River Valley]. Unpublished BA thesis. Peking University, Beijing. [in Chinese].
- Jiao, Tianlong. 2007. *The Neolithic of Southeast China: cultural transformation and regional interaction on the coast*. Youngstown: Cambria Press.
- Jiao, Tianlong. 2013. The Neolithic archaeology of southeast China. In Anne P. Underhill (ed) *A Companion to Chinese Archaeology*, 597–611. Hoboken: Wiley.
- Jin Hetian, Xu Liu, Rui Min, Xiaorui Li and Xiaohong Wu. 2014. Early Subsistence Practices at prehistoric Dadunzi in Yuanmou, Yunnan: New Evidence for the Origins of Early Agriculture in southwest China. In Anke Hein (ed.) *The 'Crescent-shaped cultural-communication belt': Tong Enzheng's Model in Retrospect: An examination of methodological, theoretical and material concerns of long distance interactions in East Asia*. BAR International Series 2679, 133-140. Oxford: Archaeopress.
- Jin, Guiyun, Shengdong Yan, Tetsuro Udatsu, Yufu Lan, Chunyan Wang and Peihua Tong. 2007. Neolithic rice paddy from the Zhaojiazhuang site, Shandong, China. *Chinese Science Bulletin* 52(24): 3376-3384.
- Jin, Guiyun [靳桂云], Min Zhao [赵敏], Huaisheng Sun [孙淮生] and Jianbo Sun [孙建波]. 2009. Archaeobotanical investigations of Longshan Cultural Sites in the Chiping Area of Shandong [山东茌平龙山文化遗址植物考古调查]. *Dongfang Kaogu* [东方考古] 2009(6): 317–320. [in Chinese].
- Jin, Guiyun, Wenwan Wu, Kesi Zhang, Zebing Wang, and Xiaohong Wu. 2014. 8000-Year old rice remains from the north edge of the Shandong Highlands, East China. *Journal of Archaeological Science* 51: 34-42.
- Jin, Guiyun, Mayke Wagner, Pavel E. Tarasov, Fen Wang and Yanchang Liu. 2016. Archaeobotanical records of Middle and Late Neolithic agriculture from Shandong Province, East China, and a major change in regional subsistence during the Dawenkou Culture. *The Holocene* 26(10): 1605–1615.
- Jin, Hetian [金和天]. 2014. *Haimenkou yizhi zhiwu yicun zonghe fenxi* 海門 遺址 物遺 綜 分析. PhD Dissertation, Peking University, Beijing. [in Chinese].
- Junwu Shu, Weiming Wang, Leping Jiang and Hikaru Takahara. 2010. Early Neolithic vegetation history, fire regime and human activity at Kuahuqiao, Lower Yangtze River, East China: New and improved insight. *Quaternary International* 227: 10-21.
- Kagawa, Mitsuo [賀川光夫]. 1971. A study on the origins of agriculture in the Late Jomon. Jomon banki noko no kigen ni kansuru kenkyu [縄文晩期農業の起源に関する研究]. Beppu Daigaku [別府大学] Kokogaku Kenkyu Hokoku 2. [in Japanese].
- Kagawa, Mitsuo [賀川光夫]. 1972. Nookou no kigen (The Origin of Agriculture) [農業の起源]. Tokyo: Koudansha. [in Japanese]

- Kagawa, Mitsuo. 1973. Primitive agriculture in Japan: Latest Jomon agricultural society and means of production. *Asian Perspectives* 16(1): 1-15
- Kan, Xuhang [閻緒杭] and Qun Zhou [周群]. 2007. The Neolithic site at Shuangdun, Bengbu. *Kaogu Xuebao 考古学报 (Acta Archaeologica Sinica)* 2007(1): 92-126. [originally in Chinese]. *IA CASS 2014*: Translation Lee Yun-Kuen 李潤權: [http://www.kaogu.cn/en/Research\\_work/Settlement\\_archaeology\\_and\\_arch/2014/0808/47093.html](http://www.kaogu.cn/en/Research_work/Settlement_archaeology_and_arch/2014/0808/47093.html)
- Kang, Hyung-tae, Youn-sik Choo and Kyung-im Na. 1993. Radiocarbon dating and calibration: re-calibration of dates in Northeast Asia. *Journal of the Korean Archaeological Society* 30: 5-61. [In Korean.]
- Kasahara, Yasuo. 1982. Nabatake Iseki no Maizo Shushi no Bunseki, Dotei Kenkyu. (Analysis and identification of ancient seeds from the Nabatake site). In Tosu-shi Kyoiku linkai (ed.) *Nabatake*, 354-379. Tosu-shi Kyoiku linkai: Tosu-shi.
- Kim, Minkoo. 2014. Rice, ethnicity and the collation of archaeobotanical data for prehistoric Korea. *Archaeologies: Journal of the World Archaeological Congress* 10(2): 168-193.
- Korea Institute of Heritage. 2008. *Pyeongtaek Sosa-dong site*. Seoul: Korea Institute of Heritage.
- Kotani, Yoshinobu. 1972. *Economic Bases during the Later Jomon Periods in Kyushu, Japan: a reconsideration*. Ph.D Thesis, University of Wisconsin. Ann Arbor. Michigan: University Microfilms International.
- Kotani, Yoshinobu. 1981. Evidence of plant cultivation in Jomon Japan: Some implications. *Senri Ethnological Studies* 9: 201-212.
- Kumar, Ann. 2009. *Globalizing the Prehistory of Japan: Language, Genes and Civilisation*. London: Routledge.
- Lee, Gyoung-Ah, Gary W Crawford, Li Liu Li and Xingcan Chen. 2007. Plants and people from the early Neolithic to the Shang periods in North China. *Proceedings of the National Academy of Sciences* 104(3): 1087-1092.
- Lee, Gyoung-Ah. 2009. Reviewing the Early Studies of Plant Remains from the Heunamri site. In: Ahn S-M, Lee J-J (eds), 302-310. *Recent Trends of Study on Prehistoric Agriculture*. Seoul: Sahoepyongron.
- Lee, Gyoung-Ah. 2011. The Transition from Foraging to Farming in Prehistoric Korea. *Current Anthropology* 52(S4): S307-S329
- Lee, Gyoung-Ahn. 2009. Reviewing the Early Studies of Plant Remains from the Heunamri site. In Sung-Mo Ahn and J.J. Lee (eds), 302-310, *Recent Trends of Study on Prehistoric Agriculture*. Seoul: Sahoepyongron. [in Korean].
- Leping Jiang and Li Liu. 2006. New evidence for the origins of sedentism and rice domestication in the Lower Yangzi River, China. *Antiquity* 80(308): 355-361.
- Li, Haiming, Xinxin Zuo, Lihong Kang, Lele Ren, Fengwen Liu, Honggao Liu, Naimeng Zhang, Rui Min, Xu Liu, Guanghui Dong. 2016. Prehistoric agriculture development in the Yunnan-Guizhou Plateau, southwest China: *Archaeobotanical evidence*. *Science China Earth Sciences* 59: 1562-1573 (doi: 10.1007/s11430-016-5292-x)
- Li, Jin-Feng, Idelisi Abuduresule, Francis M. Hueber, Wen-Ying Li, Xin-Jun Hu, Yue-Zhuo Li and Cheng-Sen Li. 2013. Buried in sands: Environmental analysis at the archaeological site of Xiaohe Cemetery, Xinjiang, China. *PLoSOne* 8(7): e68957.
- Li, Kuang-chou. 1983. Problems raised by the K'en-ting excavations of 1977. *Bulletin of the Department of Archaeology and Anthropology* 43: 86-116.
- Li, Kuang-chou [李光周]. 1987. *Prehistoric Cultures at Kenting National Park [墾丁國家公園的史前文化]*. Taipei [臺北市]: 行政院文化建設委員會. [in Chinese].
- Li, Manyue, Qinghai Xu, Shengrui Zhang, Yuecon Li, Wei Ding and Jianyong Li. 2015. Indicator pollen taxa of human-induced and natural vegetation in Northern China. *The Holocene* 25(4): 686-701.
- Lin, Gongwu [林公務]. 2005. A review of Neolithic cultures in coastal Fujian [福建沿海新石器文化綜述]. *Fujian Wenbo [福建文博]* 4: 41-50. [in Chinese].

- Li, Kunsheng and Rui Min. 2014. The site of Haimenkou: New research on the chronology of the Early Bronze Age in Yunnan. In Anke Hein (ed.) The 'Crescent-shaped cultural-communication belt': Tong Enzheng's Model in Retrospect: An examination of methodological, theoretical and material concerns of long distance interactions in East Asia. BAR International Series 2679, 123-132. Oxford: Archaeopress.
- Liu CJ [刘长江], Jin GY [靳桂云] and Kong ZC [孔昭宸] (2008) *Archaeobotany: Research on seeds and fruits [植物考古-种子果实研究]*. Shandong University Orient Archaeology Research Series. Beijing: Science Press [科学出版社]. [in Chinese].
- Liu, Changjiang [刘长江], Guiyun Jin [靳桂云] and Zhaochen Kong [孔昭宸]. 2008. Archaeobotany: Research on seeds and fruits [植物考古-种子果实研究]. *Shandong University Orient Archaeology Research Series*. Beijing: Science Press [科学出版社]. [in Chinese].
- Liu, Jiangfeng [刘建峰], Junlong Zhang [张军龙], Qiang Guo [郭强], Gaofeng Shi [史高峰], Du Hongyan [杜红艳], Songmei Hu [胡松梅], Qihuang Yang [杨岐黄] and Junxing Liu [刘君幸] Shanxi Provincial Institute of Archaeology [陕西省考古研究院 陕西西安市] and Weinan Municipal Institute of Archaeology & Conservation [渭南市文物保护考古研究所 陕西渭南市]. 2011. Report on Excavations of Xinglefang Site, Huayin, Shanxi [陕西华阴兴乐坊遗址发掘简报]. *Archaeology and Cultural Relics [考古与文物]* 2011(6): 33-47. [in Chinese].
- Liu, Li and Xingcan Chen. 2012. *The Archaeology of China*. Cambridge: Cambridge University Press.
- Liu, Xu [刘旭] and Zongpin Dai [戴宗品]. 2008. Cave life 3000 years ago: Shifudong site, Gengma. [3000 年前的穴居生活：耿马石佛洞遗址] 2008. *Chinese Cultural Heritage [中国文化遗产]* 2008(6): 84-87. [in Chinese].
- Long, Tengwen and David Taylor. 2015. A revised chronology for the archaeology of the lower Yangtze, China, based on Bayesian statistical modelling. *Journal of Archaeological Science* 63: 115-121. (including supplementary tables)
- Lu, Houyuan, Jianping Zhang, Kam-biu Liu, Naiqin Wu, Yumei Li, Kunshu Zhou, Maolin Ye, Tianyu Zhang, Haijiang Zhang, Xiaoyan Yang, Licheng Shen, Deke Xu, and Quan Li. 2009. Earliest domestication of common millet (*Panicum miliaceum*) in East Asia extended to 10,000 years ago. *Proceedings Natural Academy Sciences U.S.A.* 106(18): 7367-7372.
- Lu, Tracey L. D. 1998. Some botanical characteristics of green foxtail (*Setaria viridis*) and harvesting experiments on the grass. *Antiquity* 72, 902-907.
- Lu, Tracey L. D. 1999. *The Transition from Foraging to Farming and the Origin of Agriculture in China*. BAR International Series 774. Oxford: British Archaeological Reports.
- Lu, Tracey L.-D., Zhijun Zhao and Zhuo Zheng. 2006. The prehistoric and historic environments, vegetations and subsistence strategies at Sha Ha, Sai Kung. In Antiquities and Monuments Office, HKSAR (ed.) *The Ancient Culture of Hong Kong-Archaeological Discoveries in Sha Ha, Sai Kung*, 57-64. Hong Kong: Government Logistics Department.
- Luan, Fengshi [栾丰实], Guyun Jin [靳桂云], Fuqiang Wang [王富强], Kazou Miyamoto [宫本一夫], Tesuro Udatsu, [宇田津撒朗], [Hiroyuki Tasaki [田崎博之]]. 2007. Preliminary study of rice remains from the Yanjiaquan Site, Qixia County in Shandong [山东栖霞县杨家圈遗址稻作遗存的查和初步研究]. *Kaogu [考古]* 2007(12): 78-84. [in Chinese].
- Ma, Ting, Zhuo Zheng, Barry V. Rolett, Gongwu Lin, Guifang Zhang and Yuanfu Yue. 2015. New evidence for Neolithic rice cultivation and Holocene environmental change in the Fuzhou Basin, southeast China. *Vegetation History and Archaeobotany* 25(4): 375-386.
- Ma, Xiaolin. 2005. *Emergent Social complexity in the Yangshao Culture: Analyses of settlement patterns and faunal remains from Lingbao, Western Henan, China*, BAR International Series 1453. Oxford: Archaeopress.
- Maloney, Bernard K. and John J. McAlister. 1990. Khok Phanom Di, Central Thailand: chemical analysis of pollen core KL2 and AMS radiocarbon dates from cores KL2 and BMR 2. *Geoarchaeology* 5(4): 375-382.

Matsutani, Akiko. 2006. Identification of carbonized grain on the pottery from Ryugasaki A site using SEM observation. In Shiga prefecture board of Education (ed.) *Ryugasaki A Site*, 173-178. Ohtsu: Shiga Prefecture board of Education. [in Japanese].

Minkoo Kim, Sung-Mo Ahn and Youjin Jeong. 2013. Rice (*Oryza sativa* L.): Seed-size comparison and cultivation in ancient Korea. *Economic Botany* 67(4): 378-386.

Miyata Yoshiki, Takanobu Kojima, Akiko Matsutani, Shin Onbe, and Toyohiro Nishimoto. 2007. Oldest common millet from western Japan: Carbonized material adhering to pottery from the Ryugasaki A site, Shiga prefecture. In: Mineo Imamura M. and Kenichi Kobayashi (eds). *Bulletin National Museum Japanese History* 137, 255-265. Chiba: National Museum Japanese History. [in Japanese with English abstract].

Nakamura, Toshio. 2007. Precise radiocarbon dating method by updated AMS machine, in Chengtoushan in Lixian. In Jiejun He and Yoshinori Yasuda (eds.) *Sino-Japanese Cooperative Research on Environmental Archaeology in the Liyang Basin*, 181-186. Beijing: Wenwu Press.

Nanjing Museum and Jiangsu Province Institute (2016) *Shunshanji*. Science Press, Beijing

Nasu Hiro and Momohara Arata. 2016. The beginnings of rice and millet agriculture in prehistoric Japan. *Quaternary International* 397: 504-512.

Nasu Hiro, Arata Momohara, Yoshinori Yasuda and Jiejun He. 2007. The occurrence and identification of *Setaria italica* (L.) P. Beauv. (foxtail millet) grains from the Chengtoushan site (ca. 5800 cal B.P.) in central China, with reference to the domestication centre in Asia. *Vegetation History and Archaeobotany* 16(6): 481-494.

Natapintu, Surapol. 1991. Archaeometallurgical Studies in the Khao Wong Prachan Valley, Central Thailand. *Bulletin of the Indo-Pacific Prehistory Association* 11: 153-158.

Nishida, Masaki [西田正規]. 1975. Identification of seeds [物種子の同定] In Makoto Watanabe (ed.) *Report on excavations at the Kuwagaishimo Site, Maizuru, Kyoto*. [京都府舞鶴市桑飼下遺跡発掘調査報告書舞鶴市], 244-249. Kyoto: Heian Hakubutsukan. [in Japanese].

Nishitani, Toyohiro (ed). 2007. *From the Jomon to the Yoi Period: The beginning of the Early Yayoi (Volume 2)*, [縄文時代から弥生時代へ新弥生時代のはじまり第2巻]. Tokyo: Yuzankaku [雄山閣]. [in Japanese].

Obata, Hiroki [小畑弘己著]. 2011. *Ancient plant lore in northeast Asia and Jomon cultivation*. [東北アジア古民族植物学と縄文農耕]. Doehisha: Tokyo. [in Japanese].

Oxenham, Marc F., Philip J. Piper, Peter Bellwood, Chi-Hoang Bui, Khanh Trung Kien Nguyen, Quoc Manh Nguyen, Fredeliza Campos, Cristina Castillo, Rachel Wood, Carmen Sarjeant, Noel Amano, Anna Willis and Jasminda Ceron. 2015. Emergence and Diversification of the Neolithic in Southern Vietnam: Insights from Coastal Rach Nui. *Journal of Island & Coastal Archaeology* 10(3): 309-338.

Pan, Yan. 2011. *Resource Production in the Yangzi Delta and Qiantang Drainage Basin from 10000 to 6000 BP: Palaeoethnobotanical and Human Ecological Investigations*. Unpublished Ph.D. Thesis, Department of Cultural Heritage and Museology, Fudan. University of Shanghai, China [In Chinese with English Abstract].

Pei, Anping. 1996. (On Pengtoushan Culture). In He Jiejun (ed.), *Essays on Prehistoric Cultures of the Middle Yangzi River Valley and the Second Meeting on Asian Civilization*, 81-104. Changshan: Yuelu Press. [in Chinese].

Pigott, Vincent C, Karen M. Mudar, Lisa Kealhofer, Steven Weber and Judy C. Voelker. 2006. A program of analysis of organic remains from prehistoric copper-producing settlements in the Khao Wong Prachan Valley, central Thailand. In Elizabeth A. Bacus, Ian C. Glover and Vincent C. Pigott (eds) *Uncovering Southeast Asia's past*, 154-167. Singapore: NUS Press.

Qin, Ling. 2009. The Nanjiaokou site 2007 excavated Early to Mid Yangshao plant remains. In Henan Provincial Institute of Cultural Relics and Archaeology (ed) *Nanjiaokou site in Sanmenxia*, 427-435. Beijing: Science Press.

- Qin, Ling and Dorian Q Fuller. 2009. Discussion on Plant Remains of Early and Middle Yangshao Period from Nanjiaokou Site, Henan Province and the Related Topics. In: Henan Provincial Institute of Archaeology and Cultural Relics (eds). *Sanmenxia Nanjiaokou*, 427-435. Beijing: Science Press. [in Chinese]
- Qiu, Zhenwei, Baoshan Liu, Yiquan Li, Xue Shang and Hongen Jiang. 2016. Analysis of plant remains at the Neolithic Yangjia Site, Wuxi City, Jiangsu Province (East China). *China Earth Sciences* 59(9): 1803-1816.
- Ren, Shinan. 1996. Several major achievements in Early Neolithic China, ca. 5000 BC. Trans. by Wing Kam Cheung. *Kaogu* 1996: 37-49.
- Rispoli, Fiorella. 2007. The Incised and impressed pottery style of mainland Southeast Asia: Following the paths of Neolithization. *East and West* 57(1): 235-304.
- Sergusheva, Elena A. and Yury E. Vostretsov. 2009. The advance of agriculture in the coastal zone of East Asia. In Andrew S. Fairbairn and Ehud Weiss (eds) *From Foraging to Farming: Papers in Honour of Gordon C. Hillman*. Oxford: Oxbow Books, 205-219.
- Shang Xue [尚雪], Zhang Pengcheng [张鹏程], Zhou Xinying [周新郢] et al. .2012. 陕西下河遗址新石器时代的早. [Agricultural activities at the Early Neolithic site of Xiaohu, Shanxi]. *考古与文物* [Archaeology and Cultural Relics] 2012(4): 55-59. [in Chinese].
- Shelach-Levi, Gideon. 2015. *The Archaeology of Early China: From pre-history to the Han Dynasty*. Cambridge: Cambridge University Press.
- Shelach, Gideon and Mingyu Teng. 2013. Earlier Neolithic Economic and Social Systems of the Liao River Region, Northeast China. In Anne P. Underhill (ed.), *A Companion to Chinese Archaeology*, 37-54. Oxford: Blackwell.
- Shoda, Shin'ya. 2010. Radiocarbon and archaeology in Japan and Korea: what has changed because of the Yayoi dating controversy? *Radiocarbon* 52(2-3): 421-427.
- Song Jixiang. 2011. *The agricultural economy during the Longshan period: an archaeobotanical perspective from Shandong and Shanxi*. Unpublished PhD Thesis. UCL. London.
- Spengler, Robert, Michael Frachetti, Paula Doumani, Lynne Rouse, Barbara Cerasetti, Elissa Bullion and Alexei Mar'yashev. 2014. Early agriculture and crop transmission among Bronze Age mobile pastoralists of Central Eurasia. *Proceedings of the Royal Society B*. 281: 20133382.
- Takahashi, Ryuzaburo. 2009. Symbiotic relations between paddy-field rice cultivators and hunter-gatherer-fishers in Japanese prehistory: Archaeological considerations of the transition from the Jomon Age to the Yayoi Age. *Senri Ethnological Studies* 73: 71-98.
- Thompson, Gill B. 1996. *The Excavation of Nok Phanom Di, Volume IV. Subsistence and Environment: The Botanical Remains (The Botanical Remains III)*. Reports of the Research Committee of the Society of Antiquities of London. LIII. London: Society of Antiquities
- Tosu-shi Kyoiku linkai [鳥栖市教育委員会] (ed.). 1982. *Nabatake*. Tosu-shi: Tosu-shi Kyoiku linkai. [in Japanese].
- Tsang, Chen-hwa [臧振華], Kuang Ti-Li [李匡悌] and Cheng-Yi Chu [朱正宜]. 2006. *先民履跡* [Footprints of Ancient People: Archaeological Discoveries in the Tainan Science Park]. Hsin Yin: Tainan County Cultural Bureau. [in Chinese].
- Tsang, Chen-hwa, Kuang-ti Li, Tze-fu Hsu, Yuan-ching Tsai, Po-hsuan Fang and Yue-le Caroline Hsing. 2017. Broomcorn and foxtail millet were cultivated in Taiwan about 5000 years ago. *Botanical Studies* 58(3): DOI 10.1186/s40529-016-0158-2
- Underhill, Anne P, Gary F Feinman, Linda M. Nicholas, Hui Fang, Fengshi Luan, Haiguang Yu and Fengshu Cai. 2008. Changes in regional settlement patterns and the development of complex societies in southeastern Shandong, China. *Journal of Anthropological Archaeology* 27: 1-29.
- Vanna, Ly. 2001. Recent archaeological research in the floodplain of the Tongle Sap River: the shell midden site of Samrong Sen and its pottery characteristics. *Journal of Southeast Asian Archaeology* 21: 47-81.



- Vanna, Ly. 2002. Rice remains in the prehistoric pottery tempers of the shell midden site of Samrong Sen: Implications for early rice cultivation in Central Cambodia. *Aséanie* 9(1): 13-34.
- Vincent Brian. 2003. Rice in pottery: new evidence for early rice cultivation in Thailand. *Bulletin of the Indo-Pacific Association* 23: 51-58.
- Wang, Haiyu [王海玉], Yanchang Lui [刘延常] and Guiyun Jin [靳桂云]. 2011. Analysis of carbonized remains from the Dongpan site, Linshu County, Shandong in 2009 [山东省临沭县东盘遗址 2009 年度炭化植物遗存分析]. *Dongfang Kaogu [东方考古]* 8: 357-372. [in Chinese]
- Wang, Jihua. 1984. Charred foxtail millets found in the Shawoli site, Xinzheng. *Agricultural Archaeology* 1984(2): 194-207. [In Chinese.]
- Wang, Zenglin [王增林] and Jia'an Wu [吴加安]. 1998. Phytolith analysis of the Yuchisi site - Characterizing the prehistoric agricultural economy of the Yuchisi site [尉迟寺遗址硅酸体分析 - 兼论尉迟寺遗址史前农业经济特点]. *Archaeology Kagou* 1998(4): 87-93. [in Chinese].
- Wasano Kikuo. 1995. Higasi Asia no kodai ine to insaku kigen [Ancient rice in East Asia and the origin of rice agriculture]. In Kikuo Wasano (ed.), *Genetical and Archaeological Investigation on the Origin of Cultivated Rice and Ancient Rice Culture in East Asia*. Report submitted to the Japan Society for the Promotion of Science. [in Japanese].
- Weber, Steve, Heather Lehman, Timothy Barela, Sean Hawks and David Harriman. 2010. Rice or millets: early farming strategies in prehistoric central Thailand. *Archaeological and Anthropological Sciences* 2(2): 79-88.
- Weisskopf Alison R. 2014. *Millets, rice and farmers: phytoliths as indicators of agricultural, social and ecological change in Neolithic and Bronze age central China*. BAR International Series 2589. Oxford: Archaeopress.
- Wu, Wenwan, Xinghua Wang, Xiohong Wu, Guiyun Jin and Pavel E. Tarasov. 2014. The early Holocene archaeobotanical record from the Zhangmatun site situated at the northern edge of the Shandong Highlands, China. *Quaternary International* 348: 183-193.
- Wu, Xiaohong, Ling Qin and Guoping Sun. 2011. 14C chronological data for the Tianluoshan Site. In The Center for the Study of Chinese Archaeology, Peking University (ed.), *Integrated Studies on the Natural Remains from Tianluoshan*. Beijing. Cultural Relics Press, 40-46. [in Chinese].
- Wu, Yaoli. 1996. Prehistoric rice agriculture in the Yellow River Valley. *Bulletin of the Indo-Pacific Prehistory Association* 15: 223-224.
- Xiang, Anqiang [向安强] and Jinhong Yao [姚锦鸿]. 2006. Discussion and related issues on the discovery of ancient cultivated rice from Xinghuahe, Fengkai, Guangdong. [广东封开杏花河发现的古栽培稻及相关问题探讨]. *Nongye Kaogu [Agricultural Archaeology] [农业考古]* 2006(1): 33-45. [in Chinese].
- Xiao, Minghua [肖明华]. 1995. 云南剑川海门口青铜时代早期遗址. *Kaogu* 1995: 3-15.
- Xie, Liye. 2014. *Early to Middle Holocene Earth-working Implements and Neolithic Land-use Strategies on the Ningshao Plain, China*. Ph.D. Dissertation, School of Anthropology, University of Arizona, Tucson.
- Xie, Liye, Steven L. Kuhn, Guoping Sun; John Olsen, W., Yunfei Zheng, Pin Ding and Ye Zhao, 2015. Labor Costs for Prehistoric Earthwork Construction: Experimental and Archaeological Insights from the Lower Yangzi Basin, China. *American Antiquity* 80(1): 67-88.
- Xue, Yining [薛轶宁]. 2010. 云南剑川海门口遗址 植物遗存初步研究 [Preliminary results of the analysis of plant remains from the Haimenkou site, Jianchuan, Yunnan]. Unpublished Masters Thesis. Peking University, Beijing. [in Chinese].
- Yan, Wenming [严文明]. 1989. On the origins of rice agriculture in China [再论中国稻作农业的起源]. *Nongye Kaogu [农业考古]* 1989(2): 72-83. [in Chinese].

- Yang, Ruiping, Yimin Yang, Wenying Li, Yidilisi Abuduresule, Xingjun Hu, Changsui Wang and Hongen Jiang. 2014. Investigation of cereal remains at the Xiaohe Cemetery in Xinjiang, China. *Journal of Archaeological Science* 49: 42-47.
- Yang, Shi-Ting. [杨式挺]. 1978. Cultivated rice in Shixia [谈谈石峡发现的栽培稻遗迹]. *Wenwu [文物]* 7: 23-28. [in Chinese].
- Yang, Xiaoyan, Weiwei Wang, Yijie Zhuang, Zhao Li, Zhikun Ma, Yongchao Ma, Yong Cui, Jun Wei and Dorian Q Fuller. 2016. New radiocarbon evidence on early rice consumption and farming in South China. *The Holocene*: DOI: 10.1177/0959683616678465
- Yoon, Seo Suk. 2001. *History of food culture in Korea*. Korea: Shin-kwang Publishing.
- Yunfei Zheng, Gary W. Crawford, Leping Jiang and Xugao Chen. 2016. Rice Domestication Revealed by Reduced Shattering of Archaeological rice from the Lower Yangtze valley. *Scientific Reports* 6: 28136; doi: 10.1038/srep28136.
- Zhang, Chi and Hsiao-chun Hung. 2010. The emergence of agriculture in southern China. *Antiquity* 84: 11-25.
- Zhang, Chi and Hsiao-chun Hung. 2013. Jiahu 1: earliest farmers beyond the Yangtze River. *Antiquity* 87(33): 46-63.
- Zhang, Heng and Haiming Wang. 2005. 浙江嵊州小黄山遗址发现新石器时代早期遗存 (Early Neolithic remains found at Xiaohuangshan site, Shengzhou, Zhejiang). *Zhongguo Wenwu Bao [中国文物报]* (China Cultural Relics News) 2005 Sep. 30: 1-2.
- Zhang, Wenxu [张文绪], Cheng Qiuli [邱立诚], Shi-Ting Yan [杨式挺] and Dongfang Xiao [肖东方]. 2006. Study of ancient rice from the Shixia site, Maba, Qujiang, Guangdong Province [广东曲江马坝石峡遗址古稻研究]. *Acta Agronomica Sinica [作物学报]* 32(11): 1695-1698. [in Chinese].
- Zhang, Wenxu [张文绪], Anqiang Xiang [向安强], Licheng Qiu [邱立诚] and Jinhong Yao [姚锦鸿]. 2008. Studies on bi-peaked tubercles on the lemmas of ancient rice from the site of Jiuquhoushan, in the Xinghuahe Valley, Fengkai County, Guangdong Province [广东省封开县杏花河旧屋后山遗址古稻双峰乳突及稃壳印痕研究]. *Chinese Journal of Rice Science [中国水稻科学]*: 22(1): 103-106.
- Zhang, Zhiheng. 1998. Origin of rice agriculture on the Middle and Lower Yangtze River. *Agricultural Archaeology [农业考古]* 1998(1): 206-211. [in Chinese] Published online in English. Translation Yu Chen, B Gordon. <http://http-server.carleton.ca/~bgordon/Rice/papers/ZHNGZ98.htm>
- Zhao, Kelian [赵克良], Xiaoqiang Li [李小强], Xinying Zhou [周新郢], John Dodson and Ming Ji [纪明]. 2012. Characteristics of agricultural activities and their impact on the environment at the Xintala Site, Xinjiang, as reconstructed from archaeobotanical remains [新疆新塔拉遗址农业活动特征及其影响的植物指标]. *Quaternary Sciences [第四纪研究]* 32(2): 219-225. [in Chinese].
- Zhao, Zhijun [赵志军]. 2010. Appendix 3: Report on the plant remains from Shifodong [附录三: 石佛洞遗址植物遗存分析报告石佛洞]. In Yunnan Sheng Kaogusuo and Chengdu Shi Wenwu Kaogu Yanjiusuo (eds) *Shifodong in Gengma County [耿马石佛洞]*, 368-373. Beijing: Wenwu Chubanshe (in Chinese).
- Zhao, Zhijun [赵志军]. 2007. 公元前 2500 年- 公元前 1500 年中原地区农业经济研究 [Research into the agricultural economy of the Central Plains 2500-1500 BC]. *Keji Kaogu [科技考古]* 2: 1-11. [in Chinese].
- Zhao, Zhijun. 2011. New archaeobotanical data for the study of the origins of agriculture in China. *Current Anthropology* 52(S4): S295-S306.
- Zhao, Zhijun [赵志军] and Jian Chen [陈剑]. 2011. Results and analysis of flotation at Yingpanshan in Maoxian County, Sichuan [四川茂县营盘山遗址浮选结果及分析]. *Nanfang Wenwu [南方文物]* 2011: 60-67. [in Chinese].

Zhejiang Institute of Archaeology. 2003. *Hemudu*. Beijing: Wenwu Press. [in Chinese].

Zheng Yunfei [郑云飞] and Leping Jiang [蒋乐平]. 2007. The remains of ancient rice unearthed from the Shangshan site and their significance [上山遗址出土的古稻遗存及其意义]. *Kaogu 考古 (Archaeology)* 9, 19-25.

Zheng, Yunfei, Guoping Sun and Xugao Chen. 2007. Characteristics of the short rachillae of rice from archaeological sites dating to 7000 years ago, *Chinese Science Bulletin* 52: 1654–1660

Zheng, Yunfei, Guoping Sun, Ling Qin, Chunhai Li, Xiaohong Wu and Xugao Chen (2009) Rice fields and modes of rice cultivation between 5000 and 2500 BC in east China. *Journal of Archaeological Science* 36: 2609-2616.

Zhou Xinying, Xiaoqiang Li, Keliang Zhao, John Dodson, Nan Sun and Qing Yang. 2011. Early agricultural development and environmental effects in the Neolithic Longdong basin (eastern Gansu). *Chinese Science Bulletin* 56: 762-771.

Zhou, Xingyin, Xiaoqiang Li, John Dodson, Keliang Zhao, Pia Atahan, Nan Sun and Qing Yang. 2012. Land degradation during the Bronze Age in Hexi Corridor (Gansu, China). *Quaternary International* 254: 42-48.

Zhou, Xingyin, Xiaoqiang Li, John Dodson and Keliang Zhao. 2016. Rapid agricultural transformation in the prehistoric Hexi corridor, China. *Quaternary International* 426: 33-41.

Zhu, Yangping. 2013. The Early Neolithic in the Central Yellow River Valley, c. 7000–4000 BC. In Anne P. Underhill (ed.), *A Companion to Chinese Archaeology*, 171-193. Oxford: Blackwell.

Zuo, Xinxin, Houyuan Lu, Jianping Zhang, Can Wang, Guoping Sun and Yunfei Zheng. 2016. Radiocarbon dating of prehistoric phytoliths: a preliminary study of archaeological sites in China. *Scientific Reports* 6: 26769; doi: 10.1038/srep26769 (2016).

Zuo, Xinxin, Houyuan Lu, Leping Jiang, Jianping Zhang, Xiaoyan Yang, Xiuja Huan, Keyang He, Can Wang, and Naiqin Wu. 2017. Dating rice remains through phytolith carbon-14 study reveals domestication at beginning of the Holocene. *Proceedings of the National Academy of Sciences U.S.A.* doi/10.1073/pnas.1704304114
