# Supplementary material
Source: publisher figshare collection journal article supplement (https://brill.figshare.com/articles/dataset/_/5441608)
Supplement: Supplementary file 2 [file 1]

**Table S1. Sites with evidence for early millet use and cultivation; A)Peiligang Culture, B) Cishan Culture Sites, C) Houli Culture Sites, D) Xinglongwa Culture Sites, E) Dadiwan Culture Sites**

| Site                                               | Province       | Local Script | Culture     | C14 Material                                                     | Code                | Date         | Error    | Date                     | Cal. Start | Cal. Finish       | Median | Calibrated 2 sigma | Comments                                                                                                                                                                                                                                                                                                                 | Crops                                                                                                                             | Cultivation Tools                                                                                          | References                                                                            |
|----------------------------------------------------|----------------|--------------|-------------|------------------------------------------------------------------|---------------------|--------------|----------|--------------------------|------------|-------------------|--------|--------------------|--------------------------------------------------------------------------------------------------------------------------------------------------------------------------------------------------------------------------------------------------------------------------------------------------------------------------|-----------------------------------------------------------------------------------------------------------------------------------|------------------------------------------------------------------------------------------------------------|---------------------------------------------------------------------------------------|
| <b>HENAN: A) Peiligang Culture</b>                 |                |              |             |                                                                  |                     |              |          |                          |            |                   |        |                    |                                                                                                                                                                                                                                                                                                                          |                                                                                                                                   |                                                                                                            |                                                                                       |
| Peiligang                                          | Henan          | 裴李岗          | Peiligang   | Mixed Charcoal                                                   | ZK-0572             | 9037         | 1000     | 9037±1000 BP             | 11170      | 6100              | 8635   | 11170-6100 cal. BC | Date rejected as error margin is too large and mixing of charcoal from different trenches; likely old wood problems and potential clay contamination.                                                                                                                                                                    | Cited as Setaria. Question as to security of identification                                                                       | spades                                                                                                     | Lu (1999, table 4)                                                                    |
| Peiligang                                          | Henan          | 裴李岗          | Peiligang   | Mixed Charcoal                                                   | ZK-0434             | 7662         | 480      | 7662±480 BP              | 7730       | 5630              | 6680   | 7730-5630 cal. BC  | Date taken from Zhang and Hung (2013, table 2), amended to 5568 half-life. Date is probably unreliable. Very large error margin and notably quite early; likely old wood.                                                                                                                                                | As above                                                                                                                          | As above                                                                                                   | Zhang and Hung (2013, table 2)                                                        |
| Peiligang                                          | Henan          | 裴李岗          | Peiligang   | Charcoal                                                         | ZK-0754             | 7234         | 200      | 7234±200 BP              | 6470       | 5730              | 6100   | 6470-5730 cal. BC  | Dates cited in Zhang and Hung (2013, Table 2) use 5730 half-life. Amended here to 5568 hl.                                                                                                                                                                                                                               | As above                                                                                                                          | As above                                                                                                   | Zhang and Hung (2013, table 2)                                                        |
| Peiligang                                          | Henan          | 裴李岗          | Peiligang   | Charcoal                                                         | ZK-0571             | 6967         | 105      | 6967±105 BP              | 6030       | 5660              | 5845   | 6030-5660 cal. BC  | Dates cited in Zhang and Hung (2013, Table 2) use 5730 half-life. Amended here to 5568 hl.                                                                                                                                                                                                                               | As above                                                                                                                          | As above                                                                                                   | Zhu (2013); Lu (1998; 1999, table 4)                                                  |
| Peiligang                                          | Henan          | 裴李岗          | Peiligang   | Charcoal                                                         | ZK-0753             | 6981         | 200      | 6981±200 BP              | 6250       | 5510              | 5880   | 6250-5510 cal. BC  | Dates cited in Zhang and Hung (2013, Table 2) use 5730 half-life. Amended here to 5568 hl.                                                                                                                                                                                                                               | As above                                                                                                                          | As above                                                                                                   | Zhang and Hung (2013, table 2)                                                        |
| Peiligang                                          | Henan          | 裴李岗          | Peiligang   | Charcoal                                                         | ZK-0751             | 6253         | 215      | 6253±215 BP              | 5620       | 4720              | 5170   | 5620-4720 cal. BC  | Dates cited in Zhang and Hung (2013, Table 2) use 5730 half-life. Amended here to 5568 hl.                                                                                                                                                                                                                               | As above                                                                                                                          | As above                                                                                                   | Zhang and Hung (2013, table 2)                                                        |
| Shawoli                                            | Henan          | 沙窝李          | Peiligang   | Charcoal                                                         | ZK-1130             | 6967         | 105      | 6967±105 BP              | 6030       | 5660              | 5845   | 6030-5660 cal. BC  | Dates cited in Zhang and Hung (2013, Table 2) use 5730 half-life. Amended here to 5568 hl.                                                                                                                                                                                                                               | Setaria                                                                                                                           | spades                                                                                                     | Wang (1984); Lu (1998; 1999, table 4); Chen (1994); Zhang and Hung (2010); Zhu (2013) |
| Dingzhuang                                         | Henan          | 丁庄           | Peiligang   | No date                                                          |                     |              |          |                          | est. 6000  | est. 5000-6000 BC |        |                    | Ceramic typology Peiligang                                                                                                                                                                                                                                                                                               | Setaria                                                                                                                           | ?                                                                                                          | Song (2011)                                                                           |
| Fudian                                             | Henan          | 府店           | Peiligang   | No date                                                          |                     |              |          |                          | est. 5500  | est. 6000-5000 BC |        |                    | Ceramics - Late Peiligang Culture                                                                                                                                                                                                                                                                                        | Setaria (small)                                                                                                                   | ?                                                                                                          | Lee et al. 2007; Bestel et al. 2014                                                   |
| Wuluoxipo                                          | Henan          | 均罗西坡         | Peiligang   | Charcoal                                                         | Beta-404827         | 6360         | 30       | 6360±30 BP               | 5470       | 5230              | 5350   | 5470-5230 cal. BC  |                                                                                                                                                                                                                                                                                                                          | Setaria                                                                                                                           | spades                                                                                                     | Zuo et al. (2016); Lee et al. 2007                                                    |
| Wuluoxipo                                          | Henan          | 均罗西坡         | Peiligang   | phytolith                                                        | Beta-404848         | 6350         | 30       | 6350±30 BP               | 5470       | 5220              | 5345   | 5470-5220 cal. BC  |                                                                                                                                                                                                                                                                                                                          | Setaria                                                                                                                           | spades                                                                                                     | Zuo et al. (2016); Lee et al. 2007                                                    |
| Shigu                                              | Henan          | 石固           | Peiligang   | Charcoal                                                         | WB79-60             | 7239         | 90       | 7239±90 BP               | 6360       | 5920              | 6140   | 6360-5920 cal. BC  | Dates cited in Zhang and Hung (2013, Table 2) use 5730 half-life. Amended here to 5568 hl.                                                                                                                                                                                                                               | Wild foods. No grains. But has cultivation tools                                                                                  | spades                                                                                                     | Liu and Chen (2012); see also Zhang and Hung (2013)                                   |
| Shigu                                              | Henan          | 石固           | Peiligang   | Charcoal                                                         | WB80-15             | 7088         | 85       | 7088±85 BP               | 6200       | 5750              | 5975   | 6200-5750 cal. BC  | As above                                                                                                                                                                                                                                                                                                                 | As above                                                                                                                          | As above                                                                                                   | Liu and Chen (2012); see also Zhang and Hung (2013)                                   |
| Shigu                                              | Henan          | 石固           | Peiligang   | Charcoal                                                         | WB80-17             | 6911         | 85       | 6811±85 BP               | 5900       | 5560              | 5730   | 5900-5560 cal. BC  | As above                                                                                                                                                                                                                                                                                                                 | As above                                                                                                                          | As above                                                                                                   | Liu and Chen (2012); see also Zhang and Hung (2013)                                   |
| Shuiguan                                           | Henan          | 水泉           | Peiligang   | Charcoal                                                         | ZK-2345             | 7064         | 120      | 7064±120 BP              | 6210       | 5720              | 5965   | 6210-5720 cal. BC  | Ceramics - Late Peiligang Culture                                                                                                                                                                                                                                                                                        | Possible Setaria                                                                                                                  | spades                                                                                                     | Lu (1999, table 4)                                                                    |
| Shuiguan                                           | Henan          | 水泉           | Peiligang   | Charcoal                                                         | ZK-2344             | 6900         | 110      | 6900±110 BP              | 6000       | 5620              | 5810   | 6000-5620 cal. BC  | As above                                                                                                                                                                                                                                                                                                                 | As above                                                                                                                          | As above                                                                                                   | Lu (1999, table 4)                                                                    |
| E'gou Beigang                                      | Henan          | 裴沟北岗         | Peiligang   | Charcoal                                                         | ZK-580              | 7035         | 80       | 7035±80 BP               | 6050       | 5740              | 5895   | 6050-5740 cal. BC  | Dates from Lu (2000)                                                                                                                                                                                                                                                                                                     | Just wild foods                                                                                                                   | spades                                                                                                     | Lu (1999, table 4)                                                                    |
| E'gou Beigang                                      | Henan          | 裴沟北岗         | Peiligang   | Charcoal                                                         | WB-7839             | 7060         | 160      | 7060±160 BP              | 6240       | 5640              | 5940   | 6240-5640 cal. BC  | Dates from Lu (2000)                                                                                                                                                                                                                                                                                                     | As above                                                                                                                          | As above                                                                                                   | Lu (1999, table 4)                                                                    |
| E'gou Beigang                                      | Henan          | 裴沟北岗         | Peiligang   | Charcoal                                                         | WB-7838             | 6778         | 100      | 6778±100 BP              | 5890       | 5510              | 5700   | 5890-5510 cal. BC  | Dates from Lu (2000)                                                                                                                                                                                                                                                                                                     | As above                                                                                                                          | As above                                                                                                   | Lu (1999, table 4)                                                                    |
| E'gou Beigang                                      | Henan          | 裴沟北岗         | Peiligang   | Charcoal                                                         | WB-7817             | 7083         | 120      | 7083±120 BP              | 6220       | 5730              | 5975   | 6220-5730 cal. BC  | Dates cited in Zhang and Hung (2013, Table 2) use 5730 half-life. Amended here to 5568 hl.                                                                                                                                                                                                                               | As above                                                                                                                          | As above                                                                                                   | Zhang and Hung (2013, table 2)                                                        |
| <b>HEBEI: B) Cishan Culture</b>                    |                |              |             |                                                                  |                     |              |          |                          |            |                   |        |                    |                                                                                                                                                                                                                                                                                                                          |                                                                                                                                   |                                                                                                            |                                                                                       |
| Niuwaobao                                          | Hebei          | 牛湾堡          | Cishan      | No date                                                          |                     |              |          |                          |            |                   |        | 6500-5000 cal. BC  | Reported millet "piles" as seen at Cishan. See below                                                                                                                                                                                                                                                                     | reported "millet" no formal identification                                                                                        | ?                                                                                                          | Ran (1996)                                                                            |
| Cishan                                             | Hebei          | 磁山           | Cishan      | Stated as "grain" but more likely sediment containing phytoliths | G21979-1982 +CNL188 | 9212 to 6708 | 77 to 48 | 9212±77 BP to 6708±48 BP | 8620       | 5540              | 7080   | 8620-5540 cal. BC  | Nine dates reported on millet grains have been dismissed. No flotation was conducted at the site and it is therefore questionable where the source of carbon for dating derived from. Dates span almost 3000 years and dates from single features are not statistically contemporary. Possibly phytolith rich sediments. | Setaria and Panicum identified from phytoliths. However, no charred grains have been recovered or identified                      | spades                                                                                                     | Lu et al. (2009, fig 3)                                                               |
| Cishan                                             | Hebei          | 磁山           | Cishan      | Charcoal                                                         | ZK-0439             | 7147         | 100      | 7147±100 BP              | 6240       | 5810              | 6025   | 6240-5810 cal. BC  | Three charcoal dates suggest a date of around 5800-6000 BC and are consistent with unpublished new dates. NB. This date is reported using the incorrect 5730 half-life within Lu et al. 2009. Amended here to 5568 h.l.                                                                                                  | As above                                                                                                                          | As above                                                                                                   | Lu (1999, table 4); Lu et al. (2009, fig 3)                                           |
| Cishan                                             | Hebei          | 磁山           | Cishan      | Charcoal                                                         | ZK-0440             | 7030         | 100      | 7030±100 BP              | 6080       | 5710              | 5895   | 6080-5710 cal. BC  | As above                                                                                                                                                                                                                                                                                                                 | As above                                                                                                                          | As above                                                                                                   | Lu (1999, table 4); Lu et al. (2009, fig 3)                                           |
| Cishan                                             | Hebei          | 磁山           | Cishan      | Charcoal                                                         | BK-78029            | 6860         | 100      | 6860±100 BP              | 5990       | 5610              | 5800   | 5990-5610 cal. BC  | As above                                                                                                                                                                                                                                                                                                                 | As above                                                                                                                          | As above                                                                                                   | Lu (1999, table 4); Lu et al. (2009, fig 3)                                           |
| Cishan                                             | Hebei          | 磁山           | Cishan      | Unknown                                                          |                     |              |          |                          | ~6000 BC   | ~6000 BC          |        |                    | New repeat dates by Wu Xiaohong cited in Zhang and Hung (2013)                                                                                                                                                                                                                                                           | As above                                                                                                                          | As above                                                                                                   | Zhang and Hung (2013, table 2)                                                        |
| Beifudi                                            | Hebei          | 北福地          | Cishan      | Charcoal                                                         | BK2004001           | 7100         | 55       | 7100±55 BP               | 5480       | 5320              | 5400   | 5480-5320 cal. BC  | Dates are consistent but possibly slightly younger than Cishan e.g. 5500 to 6000 BC                                                                                                                                                                                                                                      | No flotation                                                                                                                      | spades                                                                                                     | Li et al. (2011)                                                                      |
| Beifudi                                            | Hebei          | 北福地          | Cishan      | Charcoal                                                         | BA04444             | 6990         | 30       | 6990±30 BP               | 5510       | 5300              | 5405   | 5510-5300 cal. BC  | As above                                                                                                                                                                                                                                                                                                                 | As above                                                                                                                          | spades                                                                                                     | Li et al. (2011)                                                                      |
| Beifudi                                            | Hebei          | 北福地          | Cishan      | Charcoal                                                         | BA03419             | 6440         | 60       | 6440±60 BP               | 5990       | 5780              | 5885   | 5990-5780 cal. BC  | As above                                                                                                                                                                                                                                                                                                                 | As above                                                                                                                          | spades                                                                                                     | Li et al. (2011)                                                                      |
| Beifudi                                            | Hebei          | 北福地          | Cishan      | Charcoal                                                         | BA04252             | 6430         | 40       | 6430±40 BP               | 6070       | 5840              | 5955   | 6070-5840 cal. BC  | As above                                                                                                                                                                                                                                                                                                                 | As above                                                                                                                          | spades                                                                                                     | Li et al. (2011)                                                                      |
| <b>SHANGDONG: C) Houli Culture Sites</b>           |                |              |             |                                                                  |                     |              |          |                          |            |                   |        |                    |                                                                                                                                                                                                                                                                                                                          |                                                                                                                                   |                                                                                                            |                                                                                       |
| Yuezhuang                                          | Shandong       | 月庄           | Houli       | Rice grains                                                      | TO-11865            | 7050         | 80       | 7050±80 BP               | 6060       | 5750              | 5905   | 6060-5750 cal. BC  | Houli Culture the dates are broadly contemporary with Cishan. Millets are seen to be in early stages of cultivation (Crawford et al. 2016).                                                                                                                                                                              | Mainly Panicum and Oryza, but some Setaria; unclear if rice is cultivated/domesticated.                                           | Possible cultivation tools are known for Houli sites. But low in number.                                   | Crawford et al. (2006; 2016)                                                          |
| Yuezhuang                                          | Shandong       | 月庄           | Houli       | Millet Grains                                                    | BA-8168             | 6900         | 35       | 6900±35 BP               | 5880       | 5710              | 5795   | 5880-5710 cal. BC  | As above. Direct dates on Panicum                                                                                                                                                                                                                                                                                        | As above                                                                                                                          | As above                                                                                                   | Crawford et al. (2006; 2016)                                                          |
| Xihe                                               | Shandong       | 西河           | Houli       | Rice grain (H358)                                                | BA10679             | 7090         | 30       | 7090±30 BP               | 6030       | 5900              | 5965   | 6030-5900 cal. BC  | As above                                                                                                                                                                                                                                                                                                                 | Oryza x74, Setaria x2. Unclear if rice is cultivated/domesticated                                                                 | See comment above                                                                                          | Jin, G. et al. (2014)                                                                 |
| Xihe                                               | Shandong       | 西河           | Houli       | Rice grain (H358)                                                | BA10680             | 7115         | 30       | 7115±30 BP               | 6060       | 5910              | 5985   | 6060-5910 cal. BC  | As above                                                                                                                                                                                                                                                                                                                 | As above                                                                                                                          | See comment above                                                                                          | Jin, G. et al. (2014)                                                                 |
| Xihe                                               | Shandong       | 西河           | Houli       | Rice grain (H358)                                                | BA10681             | 7165         | 30       | 7165±30 BP               | 6080       | 5990              | 6035   | 6080-5990 cal. BC  | As above                                                                                                                                                                                                                                                                                                                 | As above                                                                                                                          | See comment above                                                                                          | Jin, G. et al. (2014)                                                                 |
| Xihe                                               | Shandong       | 西河           | Houli       | Rice grain (H358)                                                | BA10682             | 7165         | 25       | 7165±25 BP               | 6070       | 5990              | 6030   | 6070-5990 cal. BC  | As above                                                                                                                                                                                                                                                                                                                 | As above                                                                                                                          | See comment above                                                                                          | Jin, G. et al. (2014)                                                                 |
| Xihe                                               | Shandong       | 西河           | Houli       | Grape (H305)                                                     | BA10683             | 7085         | 30       | 7085±30 BP               | 6020       | 5900              | 5960   | 6020-5900 cal. BC  | As above                                                                                                                                                                                                                                                                                                                 | As above                                                                                                                          | See comment above                                                                                          | Jin, G. et al. (2014)                                                                 |
| Xihe                                               | Shandong       | 西河           | Houli       | Grape (H305)                                                     | BA10686             | 7120         | 30       | 7120±30 BP               | 6060       | 5920              | 5990   | 6060-5920 cal. BC  | As above                                                                                                                                                                                                                                                                                                                 | As above                                                                                                                          | See comment above                                                                                          | Jin, G. et al. (2014)                                                                 |
| Nantunling                                         | South Shandong | 南屯岭          | Late Beixin | Not C14 dated                                                    |                     |              |          |                          | 5000       | 4500              | 4750   | 5000-4500 cal. BC  | Site represents early millet finds after gap of a millennia                                                                                                                                                                                                                                                              | 2 Setaria, 3 Panicum                                                                                                              | See comment above                                                                                          | Chen 2007; Underhill et al. 2008                                                      |
| Zhangmatun                                         | Shandong       | 张马屯          | Early Houli | Grape (T0113)                                                    | BA10698             | 8000         | 30       | 8000±30 BP               | 7060       | 6810              | 6935   | 7060-6810 cal. BC  | The same sample with grape and millets has intrusive wheat grains. Dates appear at least 500 years older than Houli culture and 1000 years older than Xihe and Yuezhuang                                                                                                                                                 | 2 Setaria 6 Panicum. No rice. As the wheat grains are intrusive the millet grains should be regarded with caution                 | No obvious cultivation tools                                                                               | Wu et al. (2014)                                                                      |
| Zhangmatun                                         | Shandong       | 张马屯          | Early Houli | Grape (T0113)                                                    | BA10697             | 8050         | 30       | 8050±30 BP               | 7080       | 6820              | 6950   | 7080-6820 cal. BC  | As above                                                                                                                                                                                                                                                                                                                 | As above                                                                                                                          | No obvious cultivation tools                                                                               | Wu et al. (2014)                                                                      |
| Zhangmatun                                         | Shandong       | 张马屯          | Early Houli | Grape (T0113)                                                    | BA10693             | 7965         | 35       | 7965±35 BP               | 7050       | 6700              | 6875   | 7050-6700 cal. BC  | As above                                                                                                                                                                                                                                                                                                                 | As above                                                                                                                          | No obvious cultivation tools                                                                               | Wu et al. (2014)                                                                      |
| Zhangmatun                                         | Shandong       | 张马屯          | Early Houli | Grape (T0113)                                                    | BA10694             | 7820         | 30       | 7820±30 BP               | 6740       | 6590              | 6665   | 6740-6590 cal. BC  | As above                                                                                                                                                                                                                                                                                                                 | As above                                                                                                                          | No obvious cultivation tools                                                                               | Wu et al. (2014)                                                                      |
| <b>INNER MONGOLIA: D) Xinglongwa Culture Sites</b> |                |              |             |                                                                  |                     |              |          |                          |            |                   |        |                    |                                                                                                                                                                                                                                                                                                                          |                                                                                                                                   |                                                                                                            |                                                                                       |
| Xinglonggou                                        | Inner Mongolia | 兴隆沟          | Xinglongwa  | Panicum                                                          | not given           | n/a          | n/a      | not given                | 5720       | 5660              | 5690   | 5720-5660 cal. BC  | The uncalibrated date is not available - and there is some variability to how it is quoted. However, it is one of the few direct dates on millet grains.                                                                                                                                                                 | Mainly Panicum, some setaria. Millet remains are sparse in many contexts comparatively to wild food remains                       | Present                                                                                                    | Zhao, Z (2011)                                                                        |
| Xinglongwa                                         | Inner Mongolia | 兴隆洼          | Xinglongwa  | Sone; house 2                                                    | ZK-1389             | 5499         | 170      | 5499±170 BP              | 4710       | 3970              | 4340   | 4710-3970 cal. BC  | Dates quoted by Shelach and Teng (2013) and Lu (1998) are 5730 half-life. Dates here are corrected to the 5568 half-life. Date regarded as too young                                                                                                                                                                     | isotope data suggests that millet consumption is indirect e.g. through consumption of millet eating animals (see Hu et al. 2008). | Stone tools present. Regarded as more "tree like" than "spade like" compared to tools of Peiligang Culture | Shelach and Teng (2013, table 3.1); Lu (1999, table 2)                                |
| Xinglongwa                                         | Inner Mongolia | 兴隆洼          | Xinglongwa  | charcoal; house 119                                              | ZK-1390             | 6700         | 205      | 6700±205 BP              | 6020       | 5230              | 5625   | 6020-5230 cal. BC  | As above dates here are corrected to the 5568 half-life. Date broadly contemporary with Xinglonggou.                                                                                                                                                                                                                     | As above                                                                                                                          | As above                                                                                                   | Shelach and Teng (2013, table 3.1); Lu (1999, table 2)                                |
| Xinglongwa                                         | Inner Mongolia | 兴隆洼          | Xinglongwa  | charcoal; house 119                                              | ZK-1391             | 7258         | 115      | 7258±115 BP              | 6400       | 5910              | 6155   | 6400-5910 cal. BC  | As above dates here are corrected to the 5568 half-life. Date regarded as too old. Probable old wood charcoal. It is from the same house infill as two younger dates.                                                                                                                                                    | As above                                                                                                                          | As above                                                                                                   | Shelach and Teng (2013, table 3.1); Lu (1999, table 2)                                |

| Site                                   | Province       | Local Script | Culture             | C14 Material        | Code        | Date | Error | Date        | Cal. Start | Cal. Finish | Median | Calibrated 2 sigma | Comments                                                                                                                                                                                                                    | Crops                                  | Cultivation Tools                      | References                                             |
|----------------------------------------|----------------|--------------|---------------------|---------------------|-------------|------|-------|-------------|------------|-------------|--------|--------------------|-----------------------------------------------------------------------------------------------------------------------------------------------------------------------------------------------------------------------------|----------------------------------------|----------------------------------------|--------------------------------------------------------|
| Xinglongwa                             | Inner Mongolia | 兴隆洼          | Xinglongwa          | charcoal; house 119 | ZK-1392     | 7035 | 95    | 7035±95 BP  | 6070       | 5720        | 5895   | 6070-5720 cal. BC  | As above dates here are corrected to the 5568 half life. Broadly contemporary with Xinglonggou                                                                                                                              | As above                               | As above                               | Shelach and Teng (2013, table 3.1); Lu (1999, table 2) |
| Xinglongwa                             | Inner Mongolia | 兴隆洼          | Xinglongwa          | charcoal; house 121 | ZK-1393     | 6768 | 95    | 6768±95 BP  | 5880       | 5510        | 5695   | 5880-5510 cal. BC  | As above dates here are corrected to the 5568 half life. Date broadly contemporary with Xinglonggou                                                                                                                         | As above                               | As above                               | Shelach and Teng (2013, table 3.1); Lu (1999, table 2) |
| Xinglongwa                             | Inner Mongolia | 兴隆洼          | Xinglongwa          | charcoal; house 133 | ZK-1394     | 5699 | 90    | 5699±90 BP  | 4730       | 4350        | 4540   | 4730-4350 cal. BC  | As above dates here are corrected to the 5568 half life. Dates are too young                                                                                                                                                | As above                               | As above                               | Lu (1999, table 2)                                     |
| Xinglongwa                             | Inner Mongolia | 兴隆洼          | Xinglongwa          | charcoal; house 142 | ZK-2064     | 5572 | 85    | 5572±85 BP  | 4610       | 4250        | 4430   | 4610-4250 cal. BC  | As above dates here are corrected to the 5568 half life. Dates are too young                                                                                                                                                | As above                               | As above                               | Lu (1999, table 2)                                     |
| Xinglongwa                             | Inner Mongolia | 兴隆洼          | Xinglongwa          | charcoal            | ZK-3070     | 6504 | 48    | 6504±48 BP  | 5560       | 5360        | 5460   | 5560-5360 cal. BC  | As above dates here are corrected to the 5568 half life. Date broadly contemporary with Xinglonggou                                                                                                                         | As above                               | As above                               | Shelach and Teng (2013, table 3.1)                     |
| Xinglongwa                             | Inner Mongolia | 兴隆洼          | Xinglongwa          | charcoal            | ZK-3074     | 5271 | 53    | 5271±53 BP  | 4240       | 3970        | 4105   | 4240-3970 cal. BC  | As above dates here are corrected to the 5568 half life. Dates are too young                                                                                                                                                | As above                               | As above                               | Shelach and Teng (2013, table 3.1)                     |
| Xinglongwa                             | Inner Mongolia | 兴隆洼          | Xinglongwa          | charcoal            | ZK-3075     | 4987 | 54    | 4987±54 BP  | 3950       | 3650        | 3800   | 3950-3650 cal. BC  | As above dates here are corrected to the 5568 half life. Dates are too young                                                                                                                                                | As above                               | As above                               | Shelach and Teng (2013, table 3.1)                     |
| Zhaobaogou                             | Inner Mongolia | 赵宝沟          | Zhaobaogou          | charcoal            | ZK-2135     | 6034 | 95    | 6034±95 BP  | 5210       | 4720        | 4965   | 5210-4720 cal. BC  | Dates quoted by Shelach and Teng (2013); Lu (1998) are all at 5730 half-life. Dates here are corrected to the 5568 half life                                                                                                | No flotation                           | Stone cultivation tools present        | Shelach and Teng (2013, table 3.1); Lu (1999, table 2) |
| Zhaobaogou                             | Inner Mongolia | 赵宝沟          | Zhaobaogou          | charcoal            | ZK-2136     | 6044 | 95    | 6044±95 BP  | 5220       | 4720        | 4970   | 5220-4720 cal. BC  | As above dates here are corrected to the 5568 half life                                                                                                                                                                     | No flotation                           | As above                               | Shelach and Teng (2013, table 3.1); Lu (1999, table 2) |
| Zhaobaogou                             | Inner Mongolia | 赵宝沟          | Zhaobaogou          | charcoal            | ZK-2137     | 5980 | 95    | 5980±95 BP  | 5210       | 4620        | 4915   | 5210-4620 cal. BC  | As above dates here are corrected to the 5568 half life                                                                                                                                                                     | No flotation                           | As above                               | Shelach and Teng (2013, table 3.1); Lu (1999, table 2) |
| Baiyinchanghan                         | Inner Mongolia | 白音长汗         | Xinglongwa          | charcoal            | WB-90-2     | 6840 | 100   | 6840±100 BP | 5980       | 5560        | 5770   | 5980-5560 cal. BC  | Dates quoted by Shelach and Teng (2013) may be quoted at 5730 half-life (as suggested by dates given in Barton 2009). Dates are therefore corrected to the 5568 half life. Broadly contemporary with Xinglonggou/Xinglongwa | Starch analysis revealed millet starch | Present                                | Shelach and Teng (2013, table 3.1)                     |
| Baiyinchanghan                         | Inner Mongolia | 白音长汗         | Xinglongwa          | charcoal            | WB-90-1     | 6403 | 85    | 6403±85 BP  | 5530       | 5210        | 5370   | 5530-5210 cal. BC  | As above. Broadly contemporary/ slightly younger than Xinglonggou/Xinglongwa                                                                                                                                                | as above                               | Present                                | Shelach and Teng (2013, table 3.1)                     |
| Chahai                                 | Inner Mongolia | 查海           | Xinglongwa          | charcoal            | ZK-2138     | 6729 | 95    | 6729±95 BP  | 5810       | 5480        | 5645   | 5810-5480 cal. BC  | Dates quoted by Shelach and Teng (2013); Lu (1998) are all at 5730 half-life. Dates here are corrected to the 5568 half life. Broadly contemporary with other Xinglongwa sites                                              | No flotation                           | Present                                | Shelach and Teng (2013, table 3.1); Lu (1999, table 2) |
| Chahai                                 | Inner Mongolia | 查海           | Xinglongwa          | charcoal            | BA-93001    | 7151 | 150   | 7151±150 BP | 6360       | 5730        | 6045   | 6360-5730 cal. BC  | As above                                                                                                                                                                                                                    | No flotation                           | Present                                | Shelach and Teng (2013, table 3.1); Lu (1999, table 2) |
| Nantalzi                               | Inner Mongolia | 南台子          | Xinglongwa          | No date             |             |      |       |             |            |             |        | est. 6000-4000 BC  | dated by material culture                                                                                                                                                                                                   | No flotation                           | Present                                | Shelach and Teng (2013, table 3.1)                     |
| <b>GANSU: E) Dadiwan Culture Sites</b> |                |              |                     |                     |             |      |       |             |            |             |        |                    |                                                                                                                                                                                                                             |                                        |                                        |                                                        |
| Dadiwan                                | Gansu          | 大地湾          | Dadiwan             | bone collagen       | CAMS 134422 | 6615 | 35    | 6615±35 BP  | 5620       | 5490        | 5555   | 5620-5490 cal. BC  | from Barton et al. (2009)                                                                                                                                                                                                   | Panicum only                           | very small number of cultivation tools | Barton et al. (2009)                                   |
| Dadiwan                                | Gansu          | 大地湾          | Dadiwan             | bone collagen       | CAMS 134423 | 6645 | 30    | 6645±30 BP  | 5630       | 5520        | 5575   | 5630-5520 cal. BC  | from Barton et al. (2009)                                                                                                                                                                                                   | Panicum only                           | As above                               | Barton et al. (2009)                                   |
| Dadiwan                                | Gansu          | 大地湾          | Dadiwan             | bone collagen       | CAMS 134424 | 6580 | 30    | 6580±30 BP  | 5620       | 5480        | 5550   | 5620-5480 cal. BC  | from Barton et al. (2009)                                                                                                                                                                                                   | Panicum only                           | As above                               | Barton et al. (2009)                                   |
| Dadiwan                                | Gansu          | 大地湾          | Dadiwan             | bone collagen       | CAMS 134427 | 6280 | 30    | 6280±30 BP  | 5320       | 5210        | 5265   | 5320-5210 cal. BC  | from Barton et al. (2009)                                                                                                                                                                                                   | Panicum only                           | As above                               | Barton et al. (2009)                                   |
| Dadiwan                                | Gansu          | 大地湾          | Dadiwan             | bone collagen       | CAMS 134452 | 6720 | 40    | 6720±40 BP  | 5720       | 5560        | 5640   | 5720-5560 cal. BC  | from Barton et al. (2009)                                                                                                                                                                                                   | Panicum only                           | As above                               | Barton et al. (2009)                                   |
| Dadiwan                                | Gansu          | 大地湾          | Dadiwan             | bone collagen       | CAMS 134453 | 6690 | 40    | 6690±40 BP  | 5680       | 5520        | 5600   | 5680-5520 cal. BC  | from Barton et al. (2009)                                                                                                                                                                                                   | Panicum only                           | As above                               | Barton et al. (2009)                                   |
| Qin'an I                               | Gansu          | 秦安           | Dadiwan             | No date             |             |      |       |             |            |             |        | est. 6000-5500 BC  | Li et al. (2015). No C14 date given. Figure 6 indicates the site is contemporary with Dadiwan I                                                                                                                             | Panicum only                           | ?                                      | Li et al. (2015)                                       |
| Qin'an II                              | Gansu          | 秦安           | Dadiwan             | No date             |             |      |       |             |            |             |        | est. 4300-4000 BC  | Date is broadly given as Banpo period.                                                                                                                                                                                      | Panicum and Setaria                    | ?                                      | Li et al. (2015)                                       |
| Qin'an QA10                            | Gansu          | 秦安           | Late Banpo Yangshao | Panicum milaceum    | CAMS 128457 | 4965 | 40    | 4965±40 BP  | 3930       | 3650        | 3790   | 3930-3650 cal. BC  | Dates of sites in Gansu suggest a hiatus between the Dadiwan and Banpo periods                                                                                                                                              | Panicum and Setaria                    | ?                                      | Ji (2009); Li et al. (2015)                            |
| Qin'an QA10                            | Gansu          | 秦安           | Late Banpo Yangshao | charcoal            | CAMS 128100 | 5080 | 30    | 5080±30 BP  | 3960       | 3790        | 3875   | 3960-3790 cal. BC  | Dates of sites in Gansu suggest a hiatus between the Dadiwan and Banpo periods                                                                                                                                              | Panicum and Setaria                    | ?                                      | Ji (2009); Li et al. (2015)                            |
| Lixian LX12/LX002 Heituya              | Gansu          | 礼县 LX12      | Banpo Yangshao      | charcoal            | CAMS 94205  | 5360 | 35    | 5360±35 BP  | 4330       | 4050        | 4190   | 4330-4050 cal. BC  | The same date CAMS 94205 is given in Barton (2009) for LX002 and in Ji (2009) for LX12                                                                                                                                      | Panicum and Setaria                    | ?                                      | Ji (2009); Barton (2009); Bettinger et al. (2005)      |
