# Supplementary material
Source: publisher figshare collection journal article supplement (https://brill.figshare.com/articles/dataset/_/5441608)
Supplement: Supplementary file 3 [file 1]

Table S2. Sites with evidence for early rice use and cultivation

| Site                 | Province | Local Script | Culture                | C14 Material                        | Code           | Date | Error | Date        | Cal. Start | Cal. Finish | Median | Calibrated        | Comments                                                                                                                                                                                                 | Crops                                                                                                                                                      | Cultivation Tools                                                                     | References                                                                                          |
|----------------------|----------|--------------|------------------------|-------------------------------------|----------------|------|-------|-------------|------------|-------------|--------|-------------------|----------------------------------------------------------------------------------------------------------------------------------------------------------------------------------------------------------|------------------------------------------------------------------------------------------------------------------------------------------------------------|---------------------------------------------------------------------------------------|-----------------------------------------------------------------------------------------------------|
| <b>LOWER YANGTZE</b> |          |              |                        |                                     |                |      |       |             |            |             |        |                   |                                                                                                                                                                                                          |                                                                                                                                                            |                                                                                       |                                                                                                     |
| Shangshan            | Zhejiang | 上山           | Shangshan              | Charcoal pottery temper             | BA02236        | 9610 | 160   | 9610±160 BP | 9399       | 8492        | 8945.5 | 9399-8492 cal. BC | Charcoal dates from the site often appear younger in date, raising the question of clay contamination in pottery dates (Zuo et al. 2017). This date appears considerably earlier and has been dismissed. | Rice remains in pottery. Status is still regarded as unclear as to whether it is wild, or in the early stages of domestication/cultivation                 | No definitive cultivation tools have been identified. But the site is not waterlogged | Jiang and Liu (2006); Pan (2011); Long and Taylor (2015); Zheng and Jiang (2007); Zuo et al. (2017) |
| Shangshan            | Zhejiang | 上山           | Shangshan              | Charcoal pottery temper             | BA02235        | 8740 | 110   | 8740±110 BP | 8205       | 7589        | 7897   | 8205-7589 cal. BC | As above. Date dismissed.                                                                                                                                                                                | As above                                                                                                                                                   | As above                                                                              | Jiang and Liu (2006); Pan (2011); Long and Taylor (2015); Zheng and Jiang (2007)                    |
| Shangshan            | Zhejiang | 上山           | Shangshan              | Charcoal pottery temper             | BA02237        | 8620 | 160   | 8620±160 BP | 8223       | 7358        | 7790.5 | 8223-7358 cal. BC | As above. Date dismissed.                                                                                                                                                                                | As above                                                                                                                                                   | As above                                                                              | Jiang and Liu (2006); Pan (2011); Long and Taylor (2015); Zheng and Jiang (2007)                    |
| Shangshan            | Zhejiang | 上山           | Shangshan              | Pottery temper                      | BA06126        | 8855 | 40    | 8855±40 BP  | 8215       | 7816        | 8015.5 | 8215-7816 cal. BC | As above. Date dismissed.                                                                                                                                                                                | As above                                                                                                                                                   | As above                                                                              | Pan (2011); Long and Taylor (2015); Zheng and Jiang (2007)                                          |
| Shangshan            | Zhejiang | 上山           | Shangshan              | Charcoal                            | BA06137        | 8180 | 35    | 8180±35 BP  | 7306       | 7074        | 7190   | 7306-7074 cal. BC | This date on charcoal is considerably younger than those on pottery, and questions the reliability of dates obtained from pottery temper.                                                                | As above                                                                                                                                                   | As above                                                                              | Pan (2011); Long and Taylor (2015); Zheng and Jiang (2007)                                          |
| Shangshan            | Zhejiang | 上山           | Shangshan              | Charcoal (pottery temper)           | BA02238        | 8050 | 110   | 8050±110 BP | 7315       | 6659        | 6987   | 7315-6659 cal. BC | This date is broadly contemporary with charcoal date above.                                                                                                                                              | As above                                                                                                                                                   | As above                                                                              | Jiang and Liu (2006); Pan (2011); Long and Taylor (2015); Zheng and Jiang (2007)                    |
| Shangshan            | Zhejiang | 上山           | Shangshan              | Phytoliths                          | Beta-434204    | 8280 | 40    | 8280±40 BP  | 7468       | 7185        | 7326.5 | 7468-7185 cal. BC | Date from top of Layer 8. More consistent with charcoal dates.                                                                                                                                           | As above                                                                                                                                                   | As above                                                                              | Zuo et al. (2017)                                                                                   |
| Shangshan            | Zhejiang | 上山           | Shangshan              | Phytoliths                          | Beta-434203    | 7280 | 40    | 7280±40 BP  | 6226       | 6063        | 6144.5 | 6226-6063 cal. BC | Date from top of layer 5. Generally younger than other dates.                                                                                                                                            | As above                                                                                                                                                   | As above                                                                              | Zuo et al. (2017)                                                                                   |
| Huixi                | Zhejiang | 湖西           | Shangshan              | Charcoal                            | BA30136        | 7740 | 30    | 7740±30 BP  | 6641       | 6492        | 6566.5 | 6641-6492 cal. BC | Dates for Shangshan Culture from this site on short-lived material are significantly later than the Shangshan pottery dates above. Dates possibly mark start of rice cultivation.                        | Domesticated spikelet types account for 78.7%. But the criteria used do not follow that outlined by Fuller et al. (2009), so direct comparison is unclear. | Not recorded                                                                          | Zheng et al. (2016)                                                                                 |
| Huixi                | Zhejiang | 湖西           | Shangshan              | Charcoal                            | BA30138        | 7730 | 30    | 7730±30 BP  | 6632       | 6482        | 6557   | 6632-6482 cal. BC | As above                                                                                                                                                                                                 | As above                                                                                                                                                   | Not recorded                                                                          | Zheng et al. (2016)                                                                                 |
| Huixi                | Zhejiang | 湖西           | Shangshan              | Charcoal                            | BA30140        | 7650 | 30    | 7650±30 BP  | 6497       | 6421        | 6459   | 6497-6421 cal. BC | As above                                                                                                                                                                                                 | As above                                                                                                                                                   | Not recorded                                                                          | Zheng et al. (2016)                                                                                 |
| Huixi                | Zhejiang | 湖西           | Shangshan              | Charcoal                            | BA30141        | 7630 | 30    | 7630±30 BP  | 6564       | 6429        | 6496.5 | 6564-6429 cal. BC | As above                                                                                                                                                                                                 | As above                                                                                                                                                   | Not recorded                                                                          | Zheng et al. (2016)                                                                                 |
| Huixi                | Zhejiang | 湖西           | Shangshan              | Charcoal                            | BA30139        | 7915 | 45    | 7915±45 BP  | 7029       | 6653        | 6841   | 7029-6653 cal. BC | This date is from the lowest part of a sequence but not statistically contemporary with dates only marginally above or other dates from the site. As such it should be regarded with caution.            | As above                                                                                                                                                   | Not recorded                                                                          | Zheng et al. (2016)                                                                                 |
| Huixi                | Zhejiang | 湖西           | Shangshan              | Phytoliths                          | Beta-406654    | 7680 | 30    | 7680±30 BP  | 6591       | 6463        | 6527   | 6591-6463 cal. BC | Date is broadly contemporary with other dates from the site.                                                                                                                                             | As above                                                                                                                                                   | Not recorded                                                                          | Zuo et al. (2016); Zuo et al. (2017)                                                                |
| Huixi                | Zhejiang | 湖西           | Shangshan              | Plant remains                       | Beta-407469    | 7820 | 30    | 7820±30 BP  | 6736       | 6592        | 6664   | 6736-6592 cal. BC | While broadly contemporary this date is a little older than all but one other date from the site.                                                                                                        | As above                                                                                                                                                   | Not recorded                                                                          | Zuo et al. (2016); Zuo et al. (2017)                                                                |
| Huixi                | Zhejiang | 湖西           | Shangshan              | Phytoliths                          | Beta-434202    | 7310 | 40    | 7310±40 BP  | 6237       | 6072        | 6154.5 | 6237-6072 cal. BC | Dates are generally consistent                                                                                                                                                                           | As above                                                                                                                                                   | Not recorded                                                                          | Zuo et al. (2017)                                                                                   |
| Huixi                | Zhejiang | 湖西           | Shangshan              | Phytoliths                          | Beta-434811    | 7180 | 40    | 7180±40 BP  | 6203       | 5985        | 6094   | 6203-5985 cal. BC | Dates are generally consistent                                                                                                                                                                           | As above                                                                                                                                                   | Not recorded                                                                          | Zuo et al. (2017)                                                                                   |
| Huixi                | Zhejiang | 湖西           | Shangshan              | Charcoal                            | Beta-438412    | 6710 | 40    | 6710±40 BP  | 5710       | 5558        | 5634   | 5710-5558 cal. BC | Date appears too young                                                                                                                                                                                   | As above                                                                                                                                                   | Not recorded                                                                          | Zuo et al. (2017)                                                                                   |
| Huixi                | Zhejiang | 湖西           | Shangshan              | Phytoliths                          | Beta-434199    | 7530 | 30    | 7530±30 BP  | 6457       | 6272        | 6364.5 | 6457-6272 cal. BC | Dates are generally consistent                                                                                                                                                                           | As above                                                                                                                                                   | Not recorded                                                                          | Zuo et al. (2017)                                                                                   |
| Huixi                | Zhejiang | 湖西           | Shangshan              | Charcoal                            | Beta-434197    | 7660 | 40    | 7660±40 BP  | 6591       | 6444        | 6517.5 | 6591-6444 cal. BC | Dates are generally consistent                                                                                                                                                                           | As above                                                                                                                                                   | Not recorded                                                                          | Zuo et al. (2017)                                                                                   |
| Huixi                | Zhejiang | 湖西           | Shangshan              | Charcoal                            | Beta-358085    | 7570 | 50    | 7570±50 BP  | 6507       | 6263        | 6385   | 6507-6263 cal. BC | Dates are generally consistent                                                                                                                                                                           | As above                                                                                                                                                   | Not recorded                                                                          | Zuo et al. (2017)                                                                                   |
| Huixi                | Zhejiang | 湖西           | Shangshan              | Charcoal                            | Beta-358084    | 7690 | 40    | 7690±40 BP  | 6604       | 6456        | 6530   | 6604-6456 cal. BC | Dates are generally consistent                                                                                                                                                                           | As above                                                                                                                                                   | Not recorded                                                                          | Zuo et al. (2017)                                                                                   |
| Huixi                | Zhejiang | 湖西           | Shangshan              | Charcoal                            | Beta-434200    | 7870 | 40    | 7870±40 BP  | 7004       | 6604        | 6804   | 7004-6604 cal. BC | Dates are generally consistent                                                                                                                                                                           | As above                                                                                                                                                   | Not recorded                                                                          | Zuo et al. (2017)                                                                                   |
| Huixi                | Zhejiang | 湖西           | Shangshan              | Phytoliths                          | Beta-434195    | 7790 | 40    | 7790±40 BP  | 6688       | 6506        | 6597   | 6688-6506 cal. BC | Dates are generally consistent                                                                                                                                                                           | As above                                                                                                                                                   | Not recorded                                                                          | Zuo et al. (2017)                                                                                   |
| Huixi                | Zhejiang | 湖西           | Shangshan              | Rice                                | No information | -    | -     | -           | 7350       | 6450        | 6900   | 7350-6450 cal. BC | Date is estimated from Shangshan Culture dates from Huixi and Shangshan and unpublished C14 dates reported at 7000 BC.                                                                                   | Remains of rice rachises, charred grains and phytoliths, early cultivation?                                                                                | Not recorded                                                                          | Zuo et al. (2017)                                                                                   |
| Huixi                | Zhejiang | 湖西           | Shangshan              | Phytoliths                          | Beta-438410    | 8130 | 40    | 8130±40 BP  | 7297       | 7047        | 7172   | 7297-7047 cal. BC | Date from lower strata. Appears consistent and reliable.                                                                                                                                                 | As above                                                                                                                                                   | As above                                                                              | Zuo et al. (2017)                                                                                   |
| Huixi                | Zhejiang | 湖西           | Shangshan              | Phytoliths                          | Beta-438409    | 8040 | 30    | 8040±30 BP  | 7073       | 6829        | 6951   | 7073-6829 cal. BC | Date from upper strata. Appears consistent and reliable.                                                                                                                                                 | As above                                                                                                                                                   | As above                                                                              | Zuo et al. (2017)                                                                                   |
| Huixi                | Zhejiang | 湖西           | Shangshan              | Charcoal                            | Beta-363178    | 7810 | 40    | 7810±40 BP  | 6750       | 6510        | 6630   | 6750-6510 cal. BC | Date appears slightly young                                                                                                                                                                              | As above                                                                                                                                                   | As above                                                                              | Zuo et al. (2017)                                                                                   |
| Huixi                | Zhejiang | 湖西           | Shangshan              | Charcoal                            | Beta-363179    | 8110 | 40    | 8110±40 BP  | 7206       | 7066        | 7136   | 7206-7066 cal. BC | Date is generally consistent                                                                                                                                                                             | As above                                                                                                                                                   | As above                                                                              | Zuo et al. (2017)                                                                                   |
| Huixi                | Zhejiang | 湖西           | Shangshan              | nutshell                            | Beta-363180    | 8050 | 40    | 8050±40 BP  | 7129       | 6823        | 6976   | 7129-6823 cal. BC | Date is consistent                                                                                                                                                                                       | As above                                                                                                                                                   | As above                                                                              | Zuo et al. (2017)                                                                                   |
| Kuohuangshan         | Zhejiang | 小黄山          | Shangshan/Kuohuangshan | Est. date/ Unclear if C14 available | -              | -    | -     | -           | 7000       | 6000        | 6500   | 7000-6000 cal. BC | As with Huixi there is a suggestion that the dates of Shangshan Culture are younger than many of the dates from Shanshan site.                                                                           | Rice grains, phytoliths and husks within pottery paste tempers as seen also at Shangshan.                                                                  | Not recorded                                                                          | Zhang et al. (2005); Zheng and Jiang (2007); Liu and Chen (2012, 67)                                |
| Kuohuangshan         | Zhejiang | 小黄山          | Shangshan/Kuohuangshan | acorns                              | HL91001        | 7076 | 155   | 7076±155 BP | 6250       | 5660        | 5955   | 6250-5660 cal. BC | Date on short lived species suggest earliest deposits date from around 6000 to 5500 BC.                                                                                                                  | Rice grains appear to be within the very early stages of domestication; Zheng et al (2007) overestimate domesticates by including immature.                | The site has a few tools including wooden hoes and animal bone scapular               | Long and Taylor (2015); Pan (2011); See Shelach-Lavi (2015; Figure 78)                              |
| Kuohuangshan         | Zhejiang | 小黄山          | Shangshan/Kuohuangshan | acorns                              | BA9906         | 6800 | 170   | 6800±170 BP | 6040       | 5380        | 5710   | 6040-5380 cal. BC | As above                                                                                                                                                                                                 | As above                                                                                                                                                   | As above                                                                              | Long and Taylor (2015); Pan (2011)                                                                  |
| Kuohuangshan         | Zhejiang | 小黄山          | Shangshan/Kuohuangshan | Leaf                                | GZ1315         | 6783 | 32    | 6783±32 BP  | 5730       | 5630        | 5680   | 5730-5630 cal. BC | As above                                                                                                                                                                                                 | As above                                                                                                                                                   | As above                                                                              | Long and Taylor (2015); Pan (2011)                                                                  |
| Kuohuangshan         | Zhejiang | 小黄山          | Shangshan/Kuohuangshan | Wood-Cane                           | KZ13173        | 6991 | 50    | 6991±50 BP  | 5990       | 5750        | 5870   | 5990-5750 cal. BC | Dates broadly consistent suggesting occupation between 6000-5500 BC                                                                                                                                      | As above                                                                                                                                                   | As above                                                                              | Long and Taylor (2015); Pan (2011)                                                                  |
| Kuohuangshan         | Zhejiang | 小黄山          | Shangshan/Kuohuangshan | Wood-Cane                           | BK2003006      | 7070 | 155   | 7070±155 BP | 6250       | 5650        | 5950   | 6250-5650 cal. BC | As above                                                                                                                                                                                                 | As above                                                                                                                                                   | As above                                                                              | Long and Taylor (2015); Pan (2011)                                                                  |
| Kuohuangshan         | Zhejiang | 小黄山          | Shangshan/Kuohuangshan | wood                                | BK2003007      | 7055 | 90    | 7055±90 BP  | 6080       | 5730        | 5905   | 6080-5730 cal. BC | As above                                                                                                                                                                                                 | As above                                                                                                                                                   | As above                                                                              | Long and Taylor (2015); Pan (2011)                                                                  |
| Kuohuangshan         | Zhejiang | 小黄山          | Shangshan/Kuohuangshan | wood                                | BA08367        | 6515 | 40    | 6515±40 BP  | 5480       | 5130        | 5305   | 5480-5130 cal. BC | As above                                                                                                                                                                                                 | As above                                                                                                                                                   | As above                                                                              | Shu et al. (2010)                                                                                   |
| Kuohuangshan         | Zhejiang | 小黄山          | Shangshan/Kuohuangshan | wood                                | BA08366        | 6715 | 40    | 6715±40 BP  | 5720       | 5550        | 5635   | 5720-5550 cal. BC | As above                                                                                                                                                                                                 | As above                                                                                                                                                   | As above                                                                              | Shu et al. (2010)                                                                                   |
| Kuohuangshan         | Zhejiang | 小黄山          | Shangshan/Kuohuangshan | wood                                | BA08365        | 6925 | 45    | 6925±45 BP  | 5970       | 5720        | 5845   | 5970-5720 cal. BC | As above                                                                                                                                                                                                 | As above                                                                                                                                                   | As above                                                                              | Shu et al. (2010)                                                                                   |
| Kuohuangshan         | Zhejiang | 小黄山          | Shangshan/Kuohuangshan | wood                                | KZ13172        | 6919 | 46    | 6919±46 BP  | 5970       | 5710        | 5840   | 5970-5710 cal. BC | As above                                                                                                                                                                                                 | As above                                                                                                                                                   | As above                                                                              | Long and Taylor (2015); Pan (2011)                                                                  |
| Kuohuangshan         | Zhejiang | 小黄山          | Shangshan/Kuohuangshan | wood                                | KZ13174        | 6886 | 65    | 6886±65 BP  | 5970       | 5640        | 5805   | 5970-5640 cal. BC | As above                                                                                                                                                                                                 | As above                                                                                                                                                   | As above                                                                              | Long and Taylor (2015); Pan (2011)                                                                  |
| Kuohuangshan         | Zhejiang | 小黄山          | Shangshan/Kuohuangshan | wood                                | BK200108       | 6615 | 110   | 6615±110 BP | 5730       | 5360        | 5545   | 5730-5360 cal. BC | As above                                                                                                                                                                                                 | As above                                                                                                                                                   | As above                                                                              | Long and Taylor (2015); Pan (2011)                                                                  |
| Kuohuangshan         | Zhejiang | 小黄山          | Shangshan/Kuohuangshan | wood                                | BK200165       | 6585 | 90    | 6585±90 BP  | 5670       | 5360        | 5515   | 5670-5360 cal. BC | As above                                                                                                                                                                                                 | As above                                                                                                                                                   | As above                                                                              | Long and Taylor (2015); Pan (2011)                                                                  |
| Kuohuangshan         | Zhejiang | 小黄山          | Shangshan/Kuohuangshan | wood                                | HL91023        | 6500 | 176   | 6500±176 BP | 5750       | 5050        | 5400   | 5750-5050 cal. BC | As above                                                                                                                                                                                                 | As above                                                                                                                                                   | As above                                                                              | Long and Taylor (2015); Pan (2011)                                                                  |
| Kuohuangshan         | Zhejiang | 小黄山          | Shangshan/Kuohuangshan | wood                                | BK200167       | 6450 | 90    | 6450±90 BP  | 5610       | 5220        | 5415   | 5610-5220 cal. BC | As above                                                                                                                                                                                                 | As above                                                                                                                                                   | As above                                                                              | Long and Taylor (2015); Pan (2011)                                                                  |
| Kuohuangshan         | Zhejiang | 小黄山          | Shangshan/Kuohuangshan | wood                                | BK200170       | 6375 | 120   | 6375±120 BP | 5610       | 5050        | 5330   | 5610-5050 cal. BC | As above                                                                                                                                                                                                 | As above                                                                                                                                                   | As above                                                                              | Long and Taylor (2015); Pan (2011)                                                                  |
| Kuohuangshan         | Zhejiang | 小黄山          | Shangshan/Kuohuangshan | wood                                | BK200169       | 6180 | 90    | 6180±90 BP  | 5330       | 4850        | 5090   | 5330-4850 cal. BC | Date appears younger                                                                                                                                                                                     | As above                                                                                                                                                   | As above                                                                              | Long and Taylor (2015); Pan (2011)                                                                  |
| Kuohuangshan         | Zhejiang | 小黄山          | Shangshan/Kuohuangshan | reed                                | BK00004        | 6200 | 100   | 6200±100 BP | 5400       | 4850        | 5125   | 5400-4850 cal. BC | Converted from 5730 to 5568 half-life. The site appears earlier than Tianluoshan and probably Hemudu.                                                                                                    | Rice spikelet bases with minority domesticated; Zheng et al 1999 (table 7(2); Zheng et al. 2007; Xie et al. 2015 were recorded.                            | Four fragments of bone scapula spades                                                 | Long and Taylor (2015); Pan (2011)                                                                  |
| Kuohuangshan         | Zhejiang | 小黄山          | Shangshan/Kuohuangshan | reed                                | ZK860          | 6080 | 130   | 6080±130 BP | 5350       | 4700        | 5025   | 5350-4700 cal. BC | As above                                                                                                                                                                                                 | As above                                                                                                                                                   | As above                                                                              | Long and Taylor (2015); Pan (2011)                                                                  |
| Hemudu               | Zhejiang | 河姆渡          | Hemudu                 | Twig, acorn                         | BK78104        | 6130 | 170   | 6130±170 BP | 5470       | 4700        | 5085   | 5470-4700 cal. BC | While date appears older, large error margin brings it in line with other dates                                                                                                                          | Rice grains. Assumed to be similar in stage of domestication process to Tianluoshan below.                                                                 | Has bone spades and hoes                                                              | Zhejiang Province Institute (2003); Pan (2011)                                                      |
| Hemudu               | Zhejiang | 河姆渡          | Hemudu                 | Acorn                               | PIV0047        | 6080 | 130   | 6080±130 BP | 5320       | 4710        | 5015   | 5320-4710 cal. BC | Dates generally in line with Fuller et al. (2011). Only dates on short lived material are included here.                                                                                                 | As above                                                                                                                                                   | As above                                                                              | Zhejiang Province Institute (2003); Pan (2011)                                                      |
| Hemudu               | Zhejiang | 河姆渡          | Hemudu                 | Rice husks                          | BK78114        | 6060 | 100   | 6060±100 BP | 5230       | 4720        | 4975   | 5230-4720 cal. BC | As above                                                                                                                                                                                                 | As above                                                                                                                                                   | As above                                                                              | Zhejiang Province Institute (2003); Pan (2011)                                                      |
| Hemudu               | Zhejiang | 河姆渡          | Hemudu                 | Rice husks                          | ZK0263         | 5890 | 120   | 5890±120 BP | 5060       | 4460        | 4760   | 5060-4460 cal. BC | As above                                                                                                                                                                                                 | As above                                                                                                                                                   | As above                                                                              | Zhejiang Province Institute (2003); Pan (2011)                                                      |
| Hemudu               | Zhejiang | 河姆渡          | Hemudu                 | Wooden pole                         | BK78111        | 5880 | 100   | 5880±100 BP | 5000       | 4500        | 4750   | 5000-4500 cal. BC | As above                                                                                                                                                                                                 | As above                                                                                                                                                   | As above                                                                              | Zhejiang Province Institute (2003); Pan (2011)                                                      |
| Hemudu               | Zhejiang | 河姆渡          | Hemudu                 | Twig, grass                         | BK78103        | 5740 | 90    | 5740±90 BP  | 4790       | 4370        | 4580   | 4790-4370 cal. BC | Dates generally in line with Wu et al. (2011). Only dates on short lived material are included here.                                                                                                     | As above                                                                                                                                                   | As above                                                                              | Zhejiang Province Institute (2003); Pan (2011)                                                      |
| Hemudu               | Zhejiang | 河姆渡          | Hemudu                 | Foxnut                              | BA06594        | 5990 | 40    | 5990±40 BP  | 5000       | 4780        | 4890   | 5000-4780 cal. BC | Dates in line with previous. But 3 newer charcoal dates (not included) were notably early and demonstrate the old charcoal effect                                                                        | As above                                                                                                                                                   | As above                                                                              | Zhejiang Province Institute (2003); Wu et al. 2011                                                  |
| Hemudu               | Zhejiang | 河姆渡          | Hemudu                 | Water chestnut                      | BA06593        | 5985 | 40    | 5985±40 BP  | 5000       | 4780        | 4890   | 5000-4780 cal. BC | As above                                                                                                                                                                                                 | As above                                                                                                                                                   | As above                                                                              | Zhejiang Province Institute (2003); Wu et al. 2011                                                  |
| Hemudu               | Zhejiang | 河姆渡          | Hemudu                 | Water chestnut                      | BA06592        | 5840 | 40    | 5840±40 BP  | 4800       | 4580        | 4690   | 4800-4580 cal. BC | As above                                                                                                                                                                                                 | As above                                                                                                                                                   | As above                                                                              | Zhejiang Province Institute (2003); Wu et al. 2011                                                  |
| Hemudu               | Zhejiang | 河姆渡          | Hemudu                 | Rice                                | BA06595        | 5720 | 40    | 5720±40 BP  | 4770       | 4530        | 4650   | 4770-4530 cal. BC | As above                                                                                                                                                                                                 | As above                                                                                                                                                   | As above                                                                              | Zhejiang Province Institute (2003); Wu et al. 2011                                                  |
| Hemudu               | Zhejiang | 河姆渡          | Hemudu                 | Acorn                               | BA06596        | 5300 | 40    | 5300±40 BP  | 4260       | 3990        | 4125   | 4260-3990 cal. BC | Date appears too young.                                                                                                                                                                                  | As above                                                                                                                                                   | As above                                                                              | Zhejiang Province Institute (2003); Wu et al. 2011                                                  |
| Hemudu               | Zhejiang | 河姆渡          | Hemudu                 | wood                                | BK75057        | 6130 | 100   | 6130±100 BP | 5350       | 4800        | 5075   | 5350-4800 cal. BC | Date appears slightly older                                                                                                                                                                              | As above                                                                                                                                                   | As above                                                                              | Zhejiang Province Institute (2003)                                                                  |
| Hemudu               | Zhejiang | 河姆渡          | Hemudu                 | wood                                | BK78101        | 5890 | 100   | 5890±100 BP | 5010       | 4500        | 4755   | 5010-4500 cal. BC | Dates in line with other dates                                                                                                                                                                           | As above                                                                                                                                                   | As above                                                                              | Zhejiang Province Institute (2003)                                                                  |
| Hemudu               | Zhejiang | 河姆渡          | Hemudu                 | wood                                | BK78102        | 5870 | 100   | 5870±100 BP | 4990       | 4490        | 4740   | 4990-4490 cal. BC | Dates in line with other dates                                                                                                                                                                           | As above                                                                                                                                                   | As above                                                                              | Zhejiang Province Institute (2003)                                                                  |
| Hemudu               | Zhejiang | 河姆渡          | Hemudu                 | Indifferent                         | BK78109        | 6080 | 200   | 6080±200 BP | 5500       | 4500        | 5000   | 5500-4500 cal. BC | Date appears slightly older                                                                                                                                                                              | As above                                                                                                                                                   | As above                                                                              | Zhejiang Province Institute (2003)                                                                  |
| Hemudu               | Zhejiang | 河姆渡          | Hemudu                 | wood                                | BK78115        | 5770 | 85    | 5770±85 BP  | 4830       | 4440        | 4635   | 4830-4440 cal. BC | Dates in line with other dates                                                                                                                                                                           | As above                                                                                                                                                   | As above                                                                              | Zhejiang Province Institute (2003)                                                                  |
| Hemudu               | Zhejiang | 河姆渡          | Hemudu                 | wood                                | BK78116        | 6050 | 85    | 6050±85 BP  | 5220       | 4740        | 4980   | 5220-4740 cal. BC | Date appears slightly older                                                                                                                                                                              | As above                                                                                                                                                   | As above                                                                              | Zhejiang Province Institute (2003)                                                                  |
| Hemudu               | Zhejiang | 河姆渡          | Hemudu                 | wood                                | ZK 059         |      |       |             |            |             |        |                   |                                                                                                                                                                                                          |                                                                                                                                                            |                                                                                       |                                                                                                     |

| Site                                                                   | Province | Local Script | Culture              | C14 Material                  | Code          | Date | Error | Date        | Cal. Start | Cal. Finish | Median | Calibrated        | Comments                                                                                                                                                                                                                                                                                                                                                                                    | Crops                                                                                                                                                                       | Cultivation Tools                                                                                      | References                                                                                                                  |
|------------------------------------------------------------------------|----------|--------------|----------------------|-------------------------------|---------------|------|-------|-------------|------------|-------------|--------|-------------------|---------------------------------------------------------------------------------------------------------------------------------------------------------------------------------------------------------------------------------------------------------------------------------------------------------------------------------------------------------------------------------------------|-----------------------------------------------------------------------------------------------------------------------------------------------------------------------------|--------------------------------------------------------------------------------------------------------|-----------------------------------------------------------------------------------------------------------------------------|
| Tianluoshan                                                            | Zhejiang | 田螺山          | Hemudu               | Euryale ferox seed            | BA06594       | 5990 | 40    | 5990±40 BP  | 5000       | 4780        | 4890   | 5000-4780 cal. BC | As above                                                                                                                                                                                                                                                                                                                                                                                    | As above                                                                                                                                                                    | As above                                                                                               | Fuller et al. (2009)                                                                                                        |
| <b>LOWER YANGTZE (continued)</b>                                       |          |              |                      |                               |               |      |       |             |            |             |        |                   |                                                                                                                                                                                                                                                                                                                                                                                             |                                                                                                                                                                             |                                                                                                        |                                                                                                                             |
| Tianluoshan                                                            | Zhejiang | 田螺山          | Hemudu               | Troglodytes nut               | BA06592       | 5840 | 40    | 5840±40 BP  | 4800       | 4580        | 4690   | 4800-4580 cal. BC | As above                                                                                                                                                                                                                                                                                                                                                                                    | As above                                                                                                                                                                    | As above                                                                                               | Fuller et al. (2009)                                                                                                        |
| Tianluoshan                                                            | Zhejiang | 田螺山          | Hemudu               | chard rice grain              | BA06595       | 5790 | 40    | 5790±40 BP  | 4730       | 4530        | 4630   | 4730-4530 cal. BC | As above                                                                                                                                                                                                                                                                                                                                                                                    | As above                                                                                                                                                                    | As above                                                                                               | Fuller et al. (2009)                                                                                                        |
| Tianluoshan                                                            | Zhejiang | 田螺山          | Hemudu               | acorn                         | BA06596       | 5300 | 40    | 5300±40 BP  | 4260       | 3990        | 4125   | 4260-3990 cal. BC | Later level.                                                                                                                                                                                                                                                                                                                                                                                | Possibly more domesticated rice, but few plant remains                                                                                                                      | As above                                                                                               | Fuller et al. (2009)                                                                                                        |
| Tianluoshan                                                            | Zhejiang | 田螺山          | Hemudu               | wood                          | BK2004028     | 5081 | 66    | 5081±66 BP  | 3990       | 3700        | 3845   | 3990-3700 cal. BC | Later level.                                                                                                                                                                                                                                                                                                                                                                                | As above                                                                                                                                                                    | As above                                                                                               | Fuller et al. (2009)                                                                                                        |
| Tianluoshan                                                            | Zhejiang | 田螺山          | Hemudu               | wood                          | BK2004030     | 6949 | 73    | 6949±73 BP  | 5990       | 5710        | 5850   | 5990-5710 cal. BC | Old wood from lowest occupation. Dismissed                                                                                                                                                                                                                                                                                                                                                  | As above                                                                                                                                                                    | As above                                                                                               | Sun Guoping, pers. comm.                                                                                                    |
| Tianluoshan                                                            | Zhejiang | 田螺山          | Hemudu               | wood                          | BK2004027     | 6711 | 60    | 6711±60 BP  | 5760       | 5470        | 5615   | 5760-5470 cal. BC | Old wood from lowest occupation. Dismissed                                                                                                                                                                                                                                                                                                                                                  | As above                                                                                                                                                                    | As above                                                                                               | Sun Guoping, pers. comm.                                                                                                    |
| Caoxieshan                                                             | Jiangsu  | 草鞋山          | Majiabang            | Rice grain                    | BA08905       | 5005 | 35    | 5005±35 BP  | 3950       | 3700        | 3825   | 3950-3700 cal. BC | Domesticated type rachis account for between 60-80% of the assemblage                                                                                                                                                                                                                                                                                                                       | Rice grains and spikelet bases. Rice appears near fully domesticated                                                                                                        | A single scapula spade                                                                                 | Fuller et al. (unpublished); Fuller and Qin (2009); Fuller et al. (2014); Xie (2014); Xie et al. (2015); Ding et al. (2011) |
| Caoxieshan                                                             | Jiangsu  | 草鞋山          | Majiabang            | Rice grain frag.              | BA08906       | 5060 | 35    | 5060±35 BP  | 3960       | 3770        | 3865   | 3960-3770 cal. BC | As above                                                                                                                                                                                                                                                                                                                                                                                    | As above                                                                                                                                                                    | As above                                                                                               | Fuller et al. (unpublished); Fuller and Qin (2009)                                                                          |
| Caoxieshan                                                             | Jiangsu  | 草鞋山          | Majiabang            | wood charcoal                 | BA08907       | 5115 | 35    | 5115±35 BP  | 3990       | 3730        | 3860   | 3990-3730 cal. BC | As above                                                                                                                                                                                                                                                                                                                                                                                    | As above                                                                                                                                                                    | As above                                                                                               | Fuller et al. (unpublished); Fuller and Qin (2009)                                                                          |
| Caoxieshan                                                             | Jiangsu  | 草鞋山          | Majiabang            | wood charcoal                 | ZK-4001       | 5460 | 115   | 5460±115 BP | 4540       | 4000        | 4270   | 4540-4000 cal. BC | Date demonstrates problems of old wood when dating charcoal. Date dismissed.                                                                                                                                                                                                                                                                                                                | As above                                                                                                                                                                    | As above                                                                                               | Wasano (1995); Fuller et al. (unpublished)                                                                                  |
| Caoxieshan                                                             | Jiangsu  | 草鞋山          | Majiabang            | wood charcoal                 | ZK-6002       | 5210 | 105   | 5210±105 BP | 4330       | 3760        | 4055   | 4330-3760 cal. BC | As above                                                                                                                                                                                                                                                                                                                                                                                    | As above                                                                                                                                                                    | As above                                                                                               | Wasano (1995); Fuller et al. (unpublished)                                                                                  |
| Caoxieshan                                                             | Jiangsu  | 草鞋山          | Majiabang            | wood charcoal                 | BK76022       | 5220 | 110   | 5220±110 BP | 4330       | 3790        | 4060   | 4330-3790 cal. BC | As above                                                                                                                                                                                                                                                                                                                                                                                    | As above                                                                                                                                                                    | As above                                                                                               | Wasano (1995); Fuller et al. (unpublished)                                                                                  |
| Yangliu                                                                | Jiangsu  | 杨林           | Majiabang            | Rice grain                    | BA131756      | 5340 | 30    | 5340±30 BP  | 4320       | 4050        | 4185   | 4320-4050 cal. BC | Broadly contemporary with Caoxieshan also of Majiabang Culture                                                                                                                                                                                                                                                                                                                              | Rice dominated seed assemblage; also phytoliths                                                                                                                             | Not recorded                                                                                           | Qiu et al. (2016)                                                                                                           |
| Yangliu                                                                | Jiangsu  | 杨林           | Majiabang            | Rice grain                    | BA131757      | 5265 | 45    | 5265±45 BP  | 4240       | 3980        | 4110   | 4240-3980 cal. BC | As above                                                                                                                                                                                                                                                                                                                                                                                    | As above                                                                                                                                                                    | As above                                                                                               | Qiu et al. (2016)                                                                                                           |
| <b>HUAI RIVER VALLEY</b>                                               |          |              |                      |                               |               |      |       |             |            |             |        |                   |                                                                                                                                                                                                                                                                                                                                                                                             |                                                                                                                                                                             |                                                                                                        |                                                                                                                             |
| Shunshanji                                                             | Jiangsu  | 顺山集          | Shunshanji           | charred rice                  | not reported  | 7640 | 30    | 7640±30 BP  | 6570       | 6430        | 6500   | 6570-6430 cal. BC | The site lies in the NW of Jiangsu in the middle to lower Huai Valley. It is assumed that the dates are based 5568 half-life making it contemporary with Shangshan Culture at Huxi.                                                                                                                                                                                                         | Rice grains and phytoliths                                                                                                                                                  | No identified cultivation tools                                                                        | Nanjing Museum and Jiangsu Province Institute (2016)                                                                        |
| Shunshanji                                                             | Jiangsu  | 顺山集          | Shunshanji           | charred rice                  | not reported  | 7660 | 30    | 7660±30 BP  | 6590       | 6450        | 6520   | 6590-6450 cal. BC | As above                                                                                                                                                                                                                                                                                                                                                                                    | As above                                                                                                                                                                    | As above                                                                                               | Nanjing Museum and Jiangsu Province Institute (2016)                                                                        |
| Shunshanji                                                             | Jiangsu  | 顺山集          | Shunshanji           | charred rice                  | not reported  | 7640 | 30    | 7640±30 BP  | 6570       | 6430        | 6500   | 6570-6430 cal. BC | As above                                                                                                                                                                                                                                                                                                                                                                                    | As above                                                                                                                                                                    | As above                                                                                               | Nanjing Museum and Jiangsu Province Institute (2016)                                                                        |
| Shunshanji                                                             | Jiangsu  | 顺山集          | Shunshanji           | charred rice                  | not reported  | 7460 | 30    | 7460±30 BP  | 6410       | 6240        | 6325   | 6410-6240 cal. BC | As above                                                                                                                                                                                                                                                                                                                                                                                    | As above                                                                                                                                                                    | As above                                                                                               | Nanjing Museum and Jiangsu Province Institute (2016)                                                                        |
| Shunshanji                                                             | Jiangsu  | 顺山集          | Shunshanji           | charcoal                      | not reported  | 7350 | 40    | 7350±40 BP  | 6360       | 6070        | 6215   | 6360-6070 cal. BC | As above                                                                                                                                                                                                                                                                                                                                                                                    | As above                                                                                                                                                                    | As above                                                                                               | Nanjing Museum and Jiangsu Province Institute (2016)                                                                        |
| Shunshanji                                                             | Jiangsu  | 顺山集          | Shunshanji           | charred rice                  | not reported  | 7035 | 35    | 7035±35 BP  | 6000       | 5840        | 5920   | 6000-5840 cal. BC | As above                                                                                                                                                                                                                                                                                                                                                                                    | As above                                                                                                                                                                    | As above                                                                                               | Nanjing Museum and Jiangsu Province Institute (2016)                                                                        |
| Shunshanji                                                             | Jiangsu  | 顺山集          | Shunshanji           | charred rice                  | not reported  | 7427 | 31    | 7427±31 BP  | 6390       | 6230        | 6310   | 6390-6230 cal. BC | As above                                                                                                                                                                                                                                                                                                                                                                                    | As above                                                                                                                                                                    | As above                                                                                               | Nanjing Museum and Jiangsu Province Institute (2016)                                                                        |
| Shunshanji                                                             | Jiangsu  | 顺山集          | Shunshanji           | charcoal                      | not reported  | 7237 | 35    | 7237±35 BP  | 6210       | 6020        | 6115   | 6210-6020 cal. BC | As above                                                                                                                                                                                                                                                                                                                                                                                    | As above                                                                                                                                                                    | As above                                                                                               | Nanjing Museum and Jiangsu Province Institute (2016)                                                                        |
| Shunshanji                                                             | Jiangsu  | 顺山集          | Shunshanji           | charcoal                      | not reported  | 6870 | 30    | 6870±30 BP  | 5840       | 5670        | 5755   | 5840-5670 cal. BC | As above                                                                                                                                                                                                                                                                                                                                                                                    | As above                                                                                                                                                                    | As above                                                                                               | Nanjing Museum and Jiangsu Province Institute (2016)                                                                        |
| Shunshanji                                                             | Jiangsu  | 顺山集          | Shunshanji           | charred rice                  | not reported  | 7470 | 40    | 7470±40 BP  | 6430       | 6240        | 6335   | 6430-6240 cal. BC | As above                                                                                                                                                                                                                                                                                                                                                                                    | As above                                                                                                                                                                    | As above                                                                                               | Nanjing Museum and Jiangsu Province Institute (2016)                                                                        |
| Shunshanji                                                             | Jiangsu  | 顺山集          | Shunshanji           | charred rice                  | not reported  | 7325 | 40    | 7325±40 BP  | 6260       | 6060        | 6160   | 6260-6060 cal. BC | As above                                                                                                                                                                                                                                                                                                                                                                                    | As above                                                                                                                                                                    | As above                                                                                               | Nanjing Museum and Jiangsu Province Institute (2016)                                                                        |
| Shuangdun                                                              | Anhui    | 双墩村          | Shuangdun            | charcoal                      | not available |      |       |             | 5380       | 5050        | 5215   | 5380-5050 cal. BC | Date is quoted as 7330 to 7000 years old, the site has been radiocarbon dated. The site is in the middle Huai Valley.                                                                                                                                                                                                                                                                       | Stone spades are mentioned in the text, but not in the lithics section and are not drawn.                                                                                   | Imprints of rice grains                                                                                | Kan and Zhou (2007)                                                                                                         |
| Kiaosungang                                                            | Anhui    | 小孙岗          | Shuangdun            | charred grapes                | Beta-388143   | 6200 | 30    | 6200±30 BP  | 5290       | 5050        | 5170   | 5290-5050 cal. BC | Date is older than date for rice from H28 from Center for Applied Isotope Studies                                                                                                                                                                                                                                                                                                           | Has charred rice                                                                                                                                                            | Not recorded                                                                                           | Cheng et al. (2016)                                                                                                         |
| Kiaosungang                                                            | Anhui    | 小孙岗          | Shuangdun            | charred grapes                | Beta-388144   | 6110 | 30    | 6110±30 BP  | 5210       | 4940        | 5075   | 5210-4940 cal. BC | As above                                                                                                                                                                                                                                                                                                                                                                                    | Has charred rice                                                                                                                                                            | As above                                                                                               | Cheng et al. (2016)                                                                                                         |
| Kiaosungang                                                            | Anhui    | 小孙岗          | Shuangdun            | charred rice                  | CAIS-23324    | 6060 | 30    | 6060±30 BP  | 5050       | 4840        | 4945   | 6050-4840 cal. BC | Direct date on charred rice.                                                                                                                                                                                                                                                                                                                                                                | Has charred rice                                                                                                                                                            | As above                                                                                               | Cheng et al. (2016)                                                                                                         |
| Kiaosungang                                                            | Anhui    | 小孙岗          | Shuangdun            | charred rice                  | CAIS-23325    | 6100 | 30    | 6100±30 BP  | 5210       | 4930        | 5070   | 5210-4930 cal. BC | As above                                                                                                                                                                                                                                                                                                                                                                                    | Has charred rice                                                                                                                                                            | As above                                                                                               | Cheng et al. (2016)                                                                                                         |
| Kiaosungang                                                            | Anhui    | 小孙岗          | Shuangdun            | charred rice                  | CAIS-23326    | 5960 | 30    | 5960±30 BP  | 4940       | 4740        | 4840   | 4940-4740 cal. BC | As above                                                                                                                                                                                                                                                                                                                                                                                    | Has charred rice                                                                                                                                                            | As above                                                                                               | Cheng et al. (2016)                                                                                                         |
| <b>MIDDLE YANGTZE</b>                                                  |          |              |                      |                               |               |      |       |             |            |             |        |                   |                                                                                                                                                                                                                                                                                                                                                                                             |                                                                                                                                                                             |                                                                                                        |                                                                                                                             |
| Bashidang                                                              | Hunan    | 八十垱          | Late Pengtoushan     | Charcoal                      | BK-94112      | 7326 | 80    | 7326±80 BP  | 6390       | 6030        | 6210   | 6390-6030 cal. BC | Dates are quoted by Chen (1999) at 5730 half life and corrected here. Given problems with old carbon/old wood when dating charcoal this date is regarded as suspect.                                                                                                                                                                                                                        | Has waterlogged rice remains, sometimes in high numbers.                                                                                                                    | Wood and bone cultivation tools are recorded from the site. But differ from those of the Lower Yangtze | Chen (1999, table 6). Cited from Pei (1996)                                                                                 |
| Bashidang                                                              | Hunan    | 八十垱          | Late Pengtoushan     | Charcoal                      | BK-94111      | 6792 | 70    | 6792±70 BP  | 5840       | 5560        | 5700   | 5840-5560 cal. BC | As above dates are corrected to 5568 h.l. This and the date below suggest he site was occupied between 5900 to 5700 cal. BC.                                                                                                                                                                                                                                                                | As above                                                                                                                                                                    | As above                                                                                               | Chen (1999, table 6). Cited from Pei (1996)                                                                                 |
| Bashidang                                                              | Hunan    | 八十垱          | Late Pengtoushan     | Charcoal                      | BK-94110      | 6981 | 70    | 6981±70 BP  | 6000       | 5730        | 5865   | 6000-5730 cal. BC | As above                                                                                                                                                                                                                                                                                                                                                                                    | As above                                                                                                                                                                    | As above                                                                                               | Chen (1999, table 6). Cited from Pei (1996)                                                                                 |
| Pengtoushan                                                            | Hunan    | 彭头山          | Pengtoushan          | carbonised rice temper        | Ox-2210       | 7550 | 90    | 7550±90 BP  | 6590       | 6230        | 6410   | 6590-6230 cal. BC | Thought to be accurate. Other dates have been dismissed due to contamination issues within extracting carbon from the clay pottery matrix as they were by Hedges et al. (1992). The dates given by Crawford and Shen (1998) do not match Hedges (1992). It is suspected that the dates were converted at some time to the 5780 half-life, but then not converted back for later calibration | Large amounts of charred rice grains and chaff used as temper within the pottery. Selected for dating by hedges et al. (1992).                                              | Not recorded                                                                                           | Hedges et al. (1992); Lu (1999: table 7.2); Crawford and Shen (1998)                                                        |
| Pengtoushan                                                            | Hunan    | 彭头山          | Pengtoushan          | carbonised rice temper        | Ox-2214       | 7040 | 140   | 7040±140 BP | 6220       | 5670        | 5945   | 6220-5670 cal. BC | As above. Thought possibly slightly too young. However it is more in line with dates on comparable cultures.                                                                                                                                                                                                                                                                                | As above                                                                                                                                                                    | Not recorded                                                                                           | Hedges et al. (1992); Lu (1999: table 7.2); Crawford and Shen (1998)                                                        |
| Pengtoushan                                                            | Hunan    | 彭头山          | Pengtoushan          | carbonised rice straw temper? | BK-89016      | 7594 | 100   | 7594±100 BP | 6640       | 6240        | 6440   | 6640-6240 cal. BC | As above. Thought to be broadly accurate. Crawford and Shen (1998) have the dated material as charcoal. Lu (1999) as carbonized rice straw                                                                                                                                                                                                                                                  | As above                                                                                                                                                                    | Not recorded                                                                                           | Chen and Hedges (1994); Lu (1999: table 7.2); Crawford and Shen (1998)                                                      |
| Chengbeixi                                                             | Hubei    | 陈青溪          | Chengbeixi           | charcoal in pottery           | ZK-2643       | 7988 | 250   | 7988±250 BP | 7530       | 6430        | 6980   | 7530-6430 cal. BC | Date is on charcoal from pottery and the discrepancy with BK-84028 raises questions of whether dates contain old carbon from the clay. Note date in Crawford and Shen (1998) uses 5730 h.l. Date is corrected here to 5568 h.l.                                                                                                                                                             | Rice tempered pottery as seen at Pengtoushan                                                                                                                                | Not recorded                                                                                           | Crawford and Shen (1998, table 2); Lu (1999, table 7.2)                                                                     |
| Chengbeixi                                                             | Hubei    | 陈青溪          | Chengbeixi           | charcoal in pottery           | ZK-2644       | 8040 | 234   | 8040±234 BP | 7530       | 6470        | 7000   | 7530-6470 cal. BC | As above the date is corrected for 5568 h.l. But date is rejected as unreliable.                                                                                                                                                                                                                                                                                                            | As above                                                                                                                                                                    | Not recorded                                                                                           | Crawford and Shen (1998, table 2); Lu (1999, table 7.2)                                                                     |
| Chengbeixi                                                             | Hubei    | 陈青溪          | Chengbeixi           | Animal bone                   | BK-84028      | 6610 | 80    | 6610±80 BP  | 5710       | 5380        | 5545   | 5710-5380 cal. BC | This date on animal bone is seen as more reliable than the dates on charcoal from pottery fabrics. Note the date in Crawford and Shen (1998) uses 5730 h.l. Date is corrected here to 5568 h.l.                                                                                                                                                                                             | As above                                                                                                                                                                    | Not recorded                                                                                           | Crawford and Shen (1998, table 2); Lu (1999, table 7.2)                                                                     |
| Zhizheng (north)                                                       | Hubei    | 枝江           | Chengbeixi           | No C14 date?                  |               |      |       |             |            |             |        | 5550              | est. 5700-5400 BC                                                                                                                                                                                                                                                                                                                                                                           | Rice temper in clay pottery as at Pengtoushan                                                                                                                               |                                                                                                        | Chang Zhizheng (1998)                                                                                                       |
| Jialing                                                                | Hubei    | 潜江           | Chengbeixi           | No C14 date?                  |               |      |       |             |            |             |        | 5550              | est. 5700-5400 BC                                                                                                                                                                                                                                                                                                                                                                           | Rice imprints recorded and used as temper within pottery pastes.                                                                                                            | Stone hoe is recorded in Chinese Arch. 2001: 3(1)                                                      | Zhang Zhizheng (1998). Hubei Provincial Inst. Cultural Relics and Archaeology 2001.                                         |
| Zaoshi Level 9                                                         | Hunan    | 皂市           | Lower Zaoshi Culture | Charcoal                      | BK-82081      | 6724 | 200   | 6724±200 BP | 6020       | 5300        | 5660   | 6020-5300 cal. BC | Date in Crawford and Shen (1998) uses 5730 h.l. Date is corrected here to 5568 h.l.                                                                                                                                                                                                                                                                                                         | White rice temper seems likely it is unclear if rice is reported from this site                                                                                             | Not recorded                                                                                           | Crawford and Shen (1998, table 2); Lu (1999, table 7.2)                                                                     |
| Zaoshi Level 9                                                         | Hunan    | 皂市           | Lower Zaoshi Culture | Carbonized straw              | Ox-2731       | 6583 | 90    | 6583±90 BP  | 5670       | 5360        | 5515   | 5670-5360 cal. BC | Date is corrected here to 5568 h.l. Zaoshi Culture is often equated with Chengbeixi and Pengtoushan.                                                                                                                                                                                                                                                                                        | As above                                                                                                                                                                    | Not recorded                                                                                           | Crawford and Shen (1998, table 2); Lu (1999, table 7.2)                                                                     |
| Huajiwuchang                                                           | Hunan    | 胡家湾          | Lower Zaoshi Culture | carbonised rice temper        | Ox-2731       | 6580 | 90    | 6580±90 BP  | 5670       | 5360        | 5515   | 5670-5360 cal. BC | Thought by Hedges et al. (1992) along with dates below to be the better representation of the true date. Other dates have been omitted. Older of 4 dates.                                                                                                                                                                                                                                   | Charred grains and rice imprints in pottery temper                                                                                                                          | Not recorded                                                                                           | Hedges et al. (1992)                                                                                                        |
| Huajiwuchang                                                           | Hunan    | 胡家湾          | Lower Zaoshi Culture | carbonised rice temper        | Ox-2218       | 6210 | 90    | 6210±90 BP  | 5380       | 4930        | 5155   | 5380-4930 cal. BC | As above. Youngest of 4 dates. Slightly younger but equated with Zaoshi Culture.                                                                                                                                                                                                                                                                                                            | As above                                                                                                                                                                    | Not recorded                                                                                           | Hedges et al. (1992)                                                                                                        |
| Huajiwuchang                                                           | Hunan    | 胡家湾          | Lower Zaoshi Culture | carbonised rice temper        | Ox-2222       | 6310 | 100   | 6310±100 BP | 5480       | 5040        | 5260   | 5480-5040 cal. BC | As above                                                                                                                                                                                                                                                                                                                                                                                    | As above                                                                                                                                                                    | Not recorded                                                                                           | Hedges et al. (1992)                                                                                                        |
| Huajiwuchang                                                           | Hunan    | 胡家湾          | Lower Zaoshi Culture | carbonised rice temper        | Ox-2733       | 6350 | 170   | 6350±170 BP | 5630       | 4910        | 5270   | 5630-4910 cal. BC | As above                                                                                                                                                                                                                                                                                                                                                                                    | As above                                                                                                                                                                    | Not recorded                                                                                           | Hedges et al. (1992)                                                                                                        |
| <b>NORTH OF THE MIDDLE YANGTZE (Upper Huai, Nanyang Basin, Handou)</b> |          |              |                      |                               |               |      |       |             |            |             |        |                   |                                                                                                                                                                                                                                                                                                                                                                                             |                                                                                                                                                                             |                                                                                                        |                                                                                                                             |
| Jiahui I                                                               | Henan    | 贾湖           | Jiahui Layer 1       | ash                           | DY-01085      | 7347 | 125   | 7347±125 BP | 6450       | 6000        | 6225   | 6450-6000 cal. BC | Dates converted from 5730 h.l. as given in HPIRA (1999: Table 92) to 5568 h.l. The calibrated dates given in Zhang and Hung (2013) use 5730 h.l. and therefore when calibrated are incorrect. The dates especially on charcoal are highly variable and notably inconsistent within and across phases.                                                                                       | Has rice grains but no millet grains or evidence for millet agriculture, as often inferred (see Bellwood 1999). Rice domestication status unclear: no domestication traits. | Stone spades are recorded making it the only site with rice and definite stone cultivation tools       | HPIRA (1999: table 92); Zhang and Hung (2013)                                                                               |
| Jiahui I                                                               | Henan    | 贾湖           | Jiahui Layer 1       | ash                           | BK-94172      | 7205 | 80    | 7205±80 BP  | 6240       | 5910        | 6075   | 6240-5910 cal. BC | As above                                                                                                                                                                                                                                                                                                                                                                                    | As above                                                                                                                                                                    | As above                                                                                               | HPIRA (1999: table 92); Zhang and Hung (2013)                                                                               |
| Jiahui I                                                               | Henan    | 贾湖           | Jiahui Layer 1       | human bone                    | BK-95013      | 6850 | 80    | 6850±80 BP  | 5970       | 5620        | 5795   | 5970-5620 cal. BC | As above. Dates on human bone appear younger                                                                                                                                                                                                                                                                                                                                                | As above                                                                                                                                                                    | As above                                                                                               | HPIRA (1999: table 92); Zhang and Hung (2013)                                                                               |
| Jiahui I                                                               | Henan    | 贾湖           | Jiahui Layer 2       | charcoal                      | BK-94173      | 7958 | 75    | 7958±75 BP  | 7060       | 6650        | 6855   | 7060-6650 cal. BC | As above. Charcoal dates appear too old.                                                                                                                                                                                                                                                                                                                                                    | As above                                                                                                                                                                    | As above                                                                                               | HPIRA (1999: table 92); Zhang and Hung (2013)                                                                               |
| Jiahui I                                                               | Henan    | 贾湖           | Jiahui Layer 2       | Fruit stones                  | BK-91007      | 7734 | 60    | 7734±60 BP  | 6660       | 6450        | 6555   | 6660-6450 cal. BC | As above. Date on this short-lived species appears significantly older than human bone dates from Jiahui I                                                                                                                                                                                                                                                                                  | As above                                                                                                                                                                    | As above                                                                                               | HPIRA (1999: table 92); Zhang and Hung (2013)                                                                               |
| Jiahui I                                                               | Henan    | 贾湖           | Jiahui Layer 2       | human bone                    | BK-95014      | 7035 | 70    | 7035±70 BP  | 6030       | 5790        | 5890   | 6030-5790 cal. BC | As above.                                                                                                                                                                                                                                                                                                                                                                                   | As above                                                                                                                                                                    | As above                                                                                               | HPIRA (1999: table 92); Zhang and Hung (2013)                                                                               |
| Jiahui I                                                               | Henan    | 贾湖           | Jiahui Layer 3       | charcoal                      | BK-94126      | 8050 | 100   | 8050±100 BP | 7310       | 6680        | 6995   | 7310-6680 cal. BC | As above. Charcoal dates appear too old.                                                                                                                                                                                                                                                                                                                                                    | As above                                                                                                                                                                    | As above                                                                                               | HPIRA (1999: table 92); Zhang and Hung (2013)                                                                               |
| Jiahui I                                                               | Henan    | 贾湖           | Jiahui Layer 3       | charcoal                      | BK-94127      | 7992 | 70    | 7992±70 BP  | 7080       | 6680        | 6880   | 7080-6680 cal. BC | As above. Charcoal dates appear too old.                                                                                                                                                                                                                                                                                                                                                    | As above                                                                                                                                                                    | As above                                                                                               | HPIRA (1999: table 92); Zhang and Hung (2013)                                                                               |
| Jiahui II                                                              | Henan    | 贾湖           | Jiahui Layer 4       | charcoal                      | BK-94177      | 7861 | 110   | 7861±110 BP | 7050       | 6490        | 6770   | 7050-6490 cal. BC | As above. Charcoal dates appear too old.                                                                                                                                                                                                                                                                                                                                                    | As above                                                                                                                                                                    | As above                                                                                               | HPIRA (1999: table 92); Zhang and Hung (2013)                                                                               |
| Jiahui II                                                              | Henan    | 贾湖           | Jiahui Layer 4       | Jash                          | DY-01089      | 6935 | 130   | 6935±130 BP | 6060       | 5620        | 5840   | 6060-5620 cal. BC | As above. Dates on charcoal seem notably older than those on other material                                                                                                                                                                                                                                                                                                                 | As above                                                                                                                                                                    | As above                                                                                               | HPIRA (1999: table 92); Zhang and Hung (2013)                                                                               |
| Jiahui II                                                              | Henan    | 贾湖           | Jiahui Layer 4       | ash                           | DY-01086      | 6904 | 120   | 6904±120 BP | 6020       | 5610        | 5815   | 6020-5610 cal. BC | As above                                                                                                                                                                                                                                                                                                                                                                                    | As above                                                                                                                                                                    | As above                                                                                               | HPIRA (1999: table 92); Zhang and Hung (2013)                                                                               |
| Jiahui II                                                              | Henan    | 贾湖           | Jiahui Layer 5       | human bone                    | BK-95018      | 7773 | 100   | 7773±100 BP | 7030       | 6430        | 6730   | 7030-6430 cal. BC | As above. This burial appears too old and is inconsistent with the phasing and other dates.                                                                                                                                                                                                                                                                                                 | As above                                                                                                                                                                    | As above                                                                                               | HPIRA (1999: table 92); Zhang and Hung (2013)                                                                               |
| Jiahui II                                                              | Henan    | 贾湖           | Jiahui Layer 5       | charcoal                      | WB-83-60      | 7696 | 150   | 7696±150 BP | 7030       | 6250        | 6640   | 7030-6250 cal. BC | As above. Notably older than the soil deposits.                                                                                                                                                                                                                                                                                                                                             | As above                                                                                                                                                                    | As above                                                                                               | HPIRA (1999: table 92); Zhang and Hung (2013)                                                                               |
| Jiahui II                                                              | Henan    | 贾湖           | Jiahui Layer 5       | human bone                    | BK-95017      | 6836 | 70    | 6836±70 BP  | 5880       | 5620        |        |                   |                                                                                                                                                                                                                                                                                                                                                                                             |                                                                                                                                                                             |                                                                                                        |                                                                                                                             |

| Site      | Province | Local Script | Culture       | C14 Material | Code      | Date | Error | Date        | Cal. Start | Cal. Finish | Median | Calibrated        | Comments                                                                                                                                                        | Crops                                                                                                                                                | Cultivation Tools    | References                                                                                    |
|-----------|----------|--------------|---------------|--------------|-----------|------|-------|-------------|------------|-------------|--------|-------------------|-----------------------------------------------------------------------------------------------------------------------------------------------------------------|------------------------------------------------------------------------------------------------------------------------------------------------------|----------------------|-----------------------------------------------------------------------------------------------|
| Jiahu III | Henan    | 贾湖           | Jiahu Layer B | charcoal     | BA-S4174  | 7603 | 80    | 7603±80 BP  | 6630       | 6250        | 6440   | 6630-6250 cal. BC | As above. Charcoal dates appear too old.                                                                                                                        | As above                                                                                                                                             | As above             | WPIRA (1999; table 92); Zhang and Hung (2013)                                                 |
| Jiahu III | Henan    | 贾湖           | Jiahu Layer D | charcoal     | BA-S4175  | 7297 | 90    | 7297±90 BP  | 6380       | 6010        | 6195   | 6380-6010 cal. BC | As above. Date appears slightly too old.                                                                                                                        | As above                                                                                                                                             | As above             | WPIRA (1999; table 92); Zhang and Hung (2013)                                                 |
| Jiahu III | Henan    | 贾湖           | Jiahu Layer B | ash          | DY-K0188  | 6818 | 130   | 6818±130 BP | 5990       | 5510        | 5750   | 5990-5510 cal. BC | As above. More consistent with other dates on ash and human burials.                                                                                            | As above                                                                                                                                             | As above             | WPIRA (1999; table 92); Zhang and Hung (2013)                                                 |
| Bailigang | Henan    | 八里岗          | pre-Yangshao  | rice grain   | BA-111568 | 7680 | 30    | 7680±30 BP  | 6600       | 6460        | 6530   | 6600-6460 cal. BC | Direct AMS date on charred rice grains.                                                                                                                         | Has rice grains and spikelet bases. The grains appear to be wild while the spikelet bases are predominately of the non-shattering domesticated type. | No cultivation tools | Deng et al. (2015)                                                                            |
| Bailigang | Henan    | 八里岗          | pre-Yangshao  | rice grain   | BA-111569 | 7690 | 25    | 7690±25 BP  | 6600       | 6470        | 6535   | 6600-6470 cal. BC | As above. Consistent with other dates on rice                                                                                                                   | As above                                                                                                                                             | No cultivation tools | Deng et al. (2015)                                                                            |
| Bailigang | Henan    | 八里岗          | pre-Yangshao  | rice grain   | BA-111571 | 7710 | 25    | 7710±25 BP  | 6600       | 6470        | 6535   | 6600-6470 cal. BC | As above. Consistent with other dates on rice                                                                                                                   | As above                                                                                                                                             | No cultivation tools | Deng et al. (2015)                                                                            |
| Bailigang | Henan    | 八里岗          | pre-Yangshao  | fruit husk   | BA-08119  | 7445 | 55    | 7445±55 BP  | 6430       | 6220        | 6325   | 6430-6220 cal. BC | Short lived species, date slightly younger than rice                                                                                                            | As above                                                                                                                                             | No cultivation tools | Deng et al. (2015)                                                                            |
| Bailigang | Henan    | 八里岗          | pre-Yangshao  | charcoal     | BAO-8129  | 7790 | 45    | 7790±45 BP  | 6700       | 6480        | 6590   | 6700-6480 cal. BC | Slightly older but broadly consistent with rice                                                                                                                 | As above                                                                                                                                             | No cultivation tools | Zhang and Hung (2013; table 2); Deng et al. 2015                                              |
| Bailigang | Henan    | 八里岗          | pre-Yangshao  | charcoal     | BAO-8122  | 7370 | 60    | 7370±60 BP  | 6390       | 6080        | 6235   | 6390-6080 cal. BC | Slightly younger than dates on rice                                                                                                                             | As above                                                                                                                                             | No cultivation tools | Zhang and Hung (2013; table 2); Deng et al. 2015                                              |
| Bailigang | Henan    | 八里岗          | pre-Yangshao  | rice grain   | BA-10080  | 7625 | 35    | 7625±35 BP  | 6570       | 6420        | 6495   | 6570-6420 cal. BC | As above. Consistent with other dates on rice                                                                                                                   | As above                                                                                                                                             | No cultivation tools | Zhang and Hung (2013; table 2); Deng et al. 2015                                              |
| Bailigang | Henan    | 八里岗          | pre-Yangshao  | rice grain   | BA-10081  | 7670 | 45    | 7670±45 BP  | 6600       | 6440        | 6520   | 6600-6440 cal. BC | As above. Consistent with other dates on rice                                                                                                                   | As above                                                                                                                                             | No cultivation tools | Zhang and Hung (2013; table 2); Deng et al. 2015                                              |
| Lijiacun  | Shaanxi  | 李家村          | Lijiacun      | charcoal     | ZK-1267   | 6069 | 90    | 6069±90 BP  | 5230       | 4740        | 4985   | 5230-4740 cal. BC | Date quoted by Crawford and Shen (1998) is 7000-6000 BC; by Chen (1999) as pre-5000 BC; by Wu (1996) as 5500-5000 BC consistent with C14 dates (see Lu (1999)). | Rice hulls present on construction debris. Bellwood (2006, 104) quotes site as having millet but this appears unsubstantiated.                       | Not recorded         | Lu (1999; table 4.7); Crawford and Shen (1998); Chen (1999); Wu (1996); Bellwood (2006, 104). |
| Lijiacun  | Shaanxi  | 李家村          | Lijiacun      | charcoal     | ZK-1268   | 6180 | 90    | 6180±90 BP  | 5330       | 4850        | 5090   | 5330-4850 cal. BC | As above                                                                                                                                                        | As above                                                                                                                                             | Not recorded         | Lu (1999; table 4.7); Crawford and Shen (1998); Chen (1999); Wu (1996)                        |
| Hejiawan  | Shaanxi  | 何家湾          | Laoguantai    | no date?     | no date?  |      |       |             | 5300       | 4700        | 5000   | est. 5000-3000 BC | Date quoted by Wu (1996) is 5000-3000 BC. But by Chen (1999) as before 5000 BC. Dates likely to be similar to Lijiacun.                                         | Rice hulls present on construction debris                                                                                                            | Not recorded         | Chen (1999); Wu (1996)                                                                        |
