# Supplementary material
Source: publisher figshare collection journal article supplement (https://brill.figshare.com/articles/dataset/_/5441608)
Supplement: Supplementary file 4 [file 1]

Table S3. Sites with evidence for the earliest co-occurrence of domesticated millet and rice agriculture for various regions of China

| Site                                                       | Province         | Local Script | Culture                        | C14 Material     | Code         | Date | Error | Date       | Cal. Start | Cal. Finish | Median | Calibrated 2 sigma | Comments                                                                                                                                                                               | Crops                                                  | References                                                                            |
|------------------------------------------------------------|------------------|--------------|--------------------------------|------------------|--------------|------|-------|------------|------------|-------------|--------|--------------------|----------------------------------------------------------------------------------------------------------------------------------------------------------------------------------------|--------------------------------------------------------|---------------------------------------------------------------------------------------|
| <b>MIDDLE YELLOW RIVER</b>                                 |                  |              |                                |                  |              |      |       |            |            |             |        |                    |                                                                                                                                                                                        |                                                        |                                                                                       |
| Nanjiakou                                                  | Henan            | 南交口          | Early Yangshao                 | Setaria          | BA08804-H02  | 5550 | 40    | 5550±40    | 4460       | 4330        | 4395   | 4460-4330 cal. BC  | Dates relate to earliest phase of occupation                                                                                                                                           | Oryza, Setaria, Panicum                                | Qin (2009); Qin and Fuller (2009)                                                     |
| Nanjiakou                                                  | Henan            | 南交口          | Early Yangshao                 | Setaria          | BA08803-H01  | 5220 | 35    | 5220±35    | 4230       | 3960        | 4095   | 4230-3960 cal. BC  | As above                                                                                                                                                                               | Oryza, Setaria, Panicum                                | Qin (2009); Qin and Fuller (2009)                                                     |
| Nanjiakou                                                  | Henan            | 南交口          | Early Yangshao                 | Panicum          | BA08805-H02  | 5195 | 40    | 5195±40    | 4230       | 3940        | 4085   | 4230-3940 cal. BC  | As above                                                                                                                                                                               | Oryza, Setaria, Panicum                                | Qin (2009); Qin and Fuller (2009)                                                     |
| Nanjiakou                                                  | Henan            | 南交口          | Early Yangshao                 | rice             | BA08802-H01  | 5125 | 35    | 5125±35    | 3990       | 3790        | 3890   | 3990-3790 cal. BC  | As above                                                                                                                                                                               | Oryza, Setaria, Panicum                                | Qin (2009); Qin and Fuller (2009)                                                     |
| Xipo                                                       | Henan            | 西坡           | Miaodigou I - Middle Yangshao  | Not C14 dated    |              |      |       |            | 4000       | 3500        | 3750   | est. 4000-3500 BC  | No C14 date reported.                                                                                                                                                                  | Oryza, Setaria, Panicum                                | Ma (2005), 100-101; Weiskopf (2014)                                                   |
| Yuangqiao                                                  | Henan            | 袁桥           | Middle to Late Yangshao        | No date recorded | N/A          |      |       |            | 4000       | 3000        | 3500   | est. 4000-3000 BC  | No C14 date reported.                                                                                                                                                                  | Oryza, Setaria, Panicum                                | Fuller and Zhang (2007)                                                               |
| Xiangjiawan                                                | Shaanxi          | 向家湾          | Late Yangshao                  | No Date Reported | N/A          |      |       |            | 5100       | 3000        | 4050   | est. 5100-3000 BC  |                                                                                                                                                                                        | Oryza, Setaria, ?Panicum                               | Lui et al., (2008: site 26), 175; Shang et al., (2012)                                |
| Xiangjiawan                                                | Shaanxi          | 向家湾          | Late Yangshao                  | No Date Reported | N/A          |      |       |            | 5100       | 3000        | 4050   | est. 5100-3000 BC  |                                                                                                                                                                                        | Oryza, Setaria, ?Panicum                               | Lui et al., (2008: site 26), 175; Shang et al., (2012)                                |
| Xiangjiawan                                                | Shaanxi          | 向家湾          | Late Yangshao                  | No Date Reported | N/A          |      |       |            | 5100       | 3000        | 4050   | est. 5100-3000 BC  |                                                                                                                                                                                        | Oryza, Setaria, ?Panicum                               | Lui et al., (2008: site 26), 175; Shang et al., (2012)                                |
| Xiangjiawan                                                | Shaanxi          | 向家湾          | Late Yangshao                  | No Date Reported | N/A          |      |       |            | 5100       | 3000        | 4050   | est. 5100-3000 BC  |                                                                                                                                                                                        | Oryza, Setaria, ?Panicum                               | Lui et al., (2008: site 26), 175; Shang et al., (2012)                                |
| Xingdefang                                                 | Shaanxi          | 兴乐坊          | Miaodigou                      | Phytolith        | Beta-409349  | 5110 | 30    | 5110±30    | 3980       | 3790        | 3885   | 3980-3790 cal. BC  |                                                                                                                                                                                        | Oryza, Setaria, Panicum                                | Zuo et al. (2016, table 1); Liu et al., (2011)                                        |
| Xingdefang                                                 | Shaanxi          | 兴乐坊          | Miaodigou                      | Charcoal         | Beta-392838  | 4800 | 30    | 4800±30    | 3650       | 3520        | 3585   | 3650-3520 cal. BC  |                                                                                                                                                                                        | Oryza, Setaria, Panicum                                | Zuo et al. (2016, table 1); Liu et al., (2011)                                        |
| Dingdian                                                   | Shanxi           | 丁店           | Middle to Late Yangshao        |                  |              |      |       |            | 4000       | 3300        | 3650   | est. 4000-3300 BC  | No C14 date reported.                                                                                                                                                                  | Oryza, Setaria, Panicum                                | Song (2011)                                                                           |
| Yadi                                                       | Shanxi           | 崖底           | Longshan                       | Not C14 dated    |              |      |       |            | 2500       | 1900        | 2200   | 2500-1900 cal. BC  | Cultural layers dating to the Erlitou were also present but didn't contain rice.                                                                                                       | Oryza, Setaria                                         | Jiang (2011)                                                                          |
| Zigan                                                      | Shanxi           | 子干           | Erlitou                        | Not C14 dated    |              |      |       |            | 1900       | 1500        | 1700   | 1900-1500 cal. BC  |                                                                                                                                                                                        | Oryza, Setaria                                         | Jiang (2011)                                                                          |
| Lixian                                                     | Gansu            | 礼县           | Miaodigou                      | No Date Reported | N/A          |      |       |            | 4000       | 3000        | 3500   | 4000-3000 cal. BC  | Rice reported in very low numbers at Lixian II & III. As below possibly intrusive.                                                                                                     | Oryza, Setaria, Panicum                                | Ji (2009); Li et al., (2015)                                                          |
| Houguanzhai                                                | Gansu            | 后官寨          | Late Yangshao, Middle Majiayao | Not recorded     | Not reported | 4230 | 60    | 4230±60 BP | 3010       | 2620        | 2815   | 3010-2620 cal. BC  | Rice grains were in very low numbers in Yangshao layers and charred seeds of rice were recovered from overlying deposits dated to c. 500-1000 AD. The C14 dates appear Early Longshan. | As above                                               | Zhou, X. et al., (2011)                                                               |
| Houguanzhai                                                | Gansu            | 后官寨          | Late Yangshao, Middle Majiayao | Not recorded     | Not reported | 4170 | 50    | 4170±50 BP | 2900       | 2600        | 2750   | 2900-2600 cal. BC  | As above.                                                                                                                                                                              | As above                                               | Zhou, X. et al., (2011)                                                               |
| Houguanzhai                                                | Gansu            | 后官寨          | Late Yangshao, Middle Majiayao | Not recorded     | Not reported | 4160 | 60    | 4160±60 BP | 2890       | 2580        | 2735   | 2890-2580 cal. BC  | As above.                                                                                                                                                                              | Oryza, Setaria, Panicum                                | Zhou, X. et al., (2011)                                                               |
| Houguanzhai                                                | Gansu            | 后官寨          | Late Yangshao, Middle Majiayao | Not recorded     | Not reported | 4150 | 60    | 4150±60 BP | 2890       | 2570        | 2730   | 2890-2570 cal. BC  | As above                                                                                                                                                                               | As above                                               | Zhou, X. et al., (2011)                                                               |
| <b>SHANDONG</b>                                            |                  |              |                                |                  |              |      |       |            |            |             |        |                    |                                                                                                                                                                                        |                                                        |                                                                                       |
| Dongpan                                                    | South Shandong   | 东盘           | Beixin                         | Rice grain       | Beta-344113  | 5140 | 30    | 5140±30 BP | 4040       | 3800        | 3920   | 4040-3800 cal. BC  | Only 2 rice grains were recovered. But also only one Panicum and one Setaria. Rice domestication status unknown.                                                                       | Oryza, Setaria, Panicum                                | Jin et al. (2016); Wang et al. (2012)                                                 |
| Beiqian                                                    | East Shandong    | 北阡           | Dawenkou                       | Rice             | Beta-344115  | 4340 | 30    | 4340±30 BP | 3030       | 2890        | 2960   | 3030-2890 cal. BC  | Only 2 grains of rice, but many more Panicum and Setaria. Rice grain looks domesticated.                                                                                               | Oryza, Setaria, Panicum                                | Jin et al. (2016)                                                                     |
| Xujiaocun                                                  | South Shandong   | 徐家村          | Late Dawenkou/Early Longshan   | Not C14 dated    | No date      |      |       |            | 3000       | 2600        | 2800   | 3000-2600 cal. BC  | 1 Oryza, 2 Setaria, 3 panicum                                                                                                                                                          | Oryza, Setaria, Panicum                                | Chen (2007)                                                                           |
| Duanjiahe                                                  | South Shandong   | 段家河          | Dawenkou/Longshan              | Not C14 dated    | No date      |      |       |            | 3000       | 2000        | 2500   | 3000-2000 cal. BC  | Listed with Xilou below.                                                                                                                                                               | Oryza, Setaria, Panicum. Triticum + Hordeum            | Liu et al., (2008: site 47, 176, site 40, 166)                                        |
| Xilou                                                      | South Shandong   | 西陵           | Dawenkou/Longshan              | Not C14 dated    | No date      |      |       |            | 3000       | 2000        | 2500   | 3000-2000 cal. BC  |                                                                                                                                                                                        | Oryza, Setaria                                         | Lui et al., (2008: site 47, 176); IPIAC (2013); Henan Arch Cass (1995)                |
| Dongpan                                                    | South Shandong   | 东盘           | Late Longshan                  | Not C14 dated    | No date      |      |       |            | 2600       | 2000        | 2300   | 2600-2000 cal. BC  | Rice is well represented in these later layers                                                                                                                                         | Oryza, Setaria, Panicum                                | d'Alpoim Guedes et al. (2015); Wang et al. (2011)                                     |
| Zhaojiazhuang                                              | Shandong         | 赵家庄          | Late Longshan                  | Not C14 dated    | No date      |      |       |            | 2600       | 2300        | 2450   | 2600-2300 cal. BC  | Large quantities of Oryza and Setaria                                                                                                                                                  | Oryza, Setaria, Panicum                                | Jin et al. (2011); Barton et al. (2014)                                               |
| Xuejiazhuang - Zhucheng                                    | South Shandong   | 薛家庄村         | Late Longshan                  | Not C14 dated    | No date      |      |       |            | 2600       | 2000        | 2300   | 2600-2000 cal. BC  | Only 4 grains of rice                                                                                                                                                                  | Setaria, Panicum and Oryza                             | d'Alpoim Guedes et al. (2015); Jin et al., (2009)                                     |
| Chenjiazhuang                                              | Shandong         | 程家庄          | Late Longshan                  | Not C14 dated    | No date      |      |       |            | 2600       | 1900        | 2250   | 2600-1900 cal. BC  |                                                                                                                                                                                        | Oryza, Setaria, Panicum                                | Song (2011)                                                                           |
| Tonglin                                                    | Central Shandong | 桐林           | Late Longshan                  | Not C14 dated    | No date      |      |       |            | 2600       | 1900        | 2250   | 2600-1900 cal. BC  | Large amounts of charred grain                                                                                                                                                         | Oryza, Setaria, Panicum                                | Song (2011)                                                                           |
| Yangjiaquan                                                | East Shandong    | 杨家圈          | Late Dawenkou                  | Not C14 dated?   | No date      |      |       |            | 2500       | 1850        | 2175   | 2500-1850 cal. BC  | No formal identification of millet species                                                                                                                                             | Oryza and millets identified from pottery impressions. | Luan et al. (1997; 2007); Crawford et al. (2005; 2006); d'Alpoim Guedes et al. (2015) |
| Liangchenzhen                                              | South Shandong   | 西城镇          | Longshan                       | Rice grain       | TO-10206     | 3610 | 60    | 3610±60 BP | 2150       | 1770        | 1960   | 2150-1770 cal. BC  | Rice and foxtail are well represented                                                                                                                                                  | Oryza, Setaria, Panicum                                | Crawford et al. (2005)                                                                |
| <b>ANHUI</b>                                               |                  |              |                                |                  |              |      |       |            |            |             |        |                    |                                                                                                                                                                                        |                                                        |                                                                                       |
| Yuchisi                                                    | Anhui            | 附近寺          | Late Dawenkou                  | Not C14 dated    | No date      |      |       |            | 2800       | 2600        | 2700   | 2800-2600 cal. BC  |                                                                                                                                                                                        | Oryza, Setaria                                         | Zhao 2007; Wang and Jia, 1998; Liu et al., 2008: site 56, 165                         |
| <b>MIDDLE YANGTZE/HAN BASIN</b>                            |                  |              |                                |                  |              |      |       |            |            |             |        |                    |                                                                                                                                                                                        |                                                        |                                                                                       |
| Chengtoushan                                               | Henan            | 坡头山          | Tangjiagang (Pre-Daxi)         | wood             | KIT-3047     | 5540 | 60    | 5540±60    | 4500       | 4260        | 4380   | 4500-4260 cal. BC  | Dates contemporary with earlier rice dates                                                                                                                                             | Oryza, Setaria                                         | Nakamura (2007)                                                                       |
| Chengtoushan                                               | Henan            | 坡头山          | Tangjiagang (Pre-Daxi)         | wood             | KIT-3041     | 5540 | 50    | 5540±50    | 4490       | 4320        | 4405   | 4490-4320 cal. BC  | Dates contemporary with earlier rice dates                                                                                                                                             | Oryza, Setaria                                         | Nakamura (2007)                                                                       |
| Chengtoushan                                               | Henan            | 坡头山          | Tangjiagang (Pre-Daxi)         | wood             | KIT-3052     | 5480 | 90    | 5480±90    | 4500       | 4050        | 4275   | 4500-4050 cal. BC  | Dates broadly contemporary with rice dates                                                                                                                                             | Oryza, Setaria                                         | Nakamura (2007)                                                                       |
| Chengtoushan                                               | Henan            | 坡头山          | Tangjiagang (Pre-Daxi)         | wood             | KIT-3048     | 5470 | 70    | 5470±70    | 4460       | 4070        | 4265   | 4460-4070 cal. BC  | Dates broadly contemporary with rice dates                                                                                                                                             | Oryza, Setaria                                         | Nakamura (2007)                                                                       |
| Chengtoushan                                               | Henan            | 坡头山          | Tangjiagang (Pre-Daxi)         | wood             | KIT-3054     | 5450 | 40    | 5450±40    | 4360       | 4230        | 4295   | 4360-4230 cal. BC  | Dates broadly contemporary with rice dates                                                                                                                                             | Oryza, Setaria                                         | Nakamura (2007)                                                                       |
| Chengtoushan                                               | Henan            | 坡头山          | Tangjiagang (Pre-Daxi)         | wood             | KIT-3046     | 5450 | 50    | 5450±50    | 4450       | 4160        | 4305   | 4450-4160 cal. BC  | Dates broadly contemporary with rice dates                                                                                                                                             | Oryza, Setaria                                         | Nakamura (2007)                                                                       |
| Chengtoushan                                               | Henan            | 坡头山          | Tangjiagang (Pre-Daxi)         | wood             | KIT-3049     | 5370 | 50    | 5370±50    | 4340       | 4050        | 4195   | 4340-4050 cal. BC  | Dates contemporary with later rice dates                                                                                                                                               | Oryza, Setaria                                         | Nakamura (2007)                                                                       |
| Chengtoushan                                               | Henan            | 坡头山          | Tangjiagang (Pre-Daxi)         | wood             | KIT-3050     | 5360 | 60    | 5360±60    | 4340       | 4040        | 4190   | 4340-4040 cal. BC  | Dates contemporary with later rice dates                                                                                                                                               | Oryza, Setaria                                         | Nakamura (2007)                                                                       |
| Chengtoushan                                               | Henan            | 坡头山          | Tangjiagang (Pre-Daxi)         | wood             | KIT-3042     | 5360 | 30    | 5360±30    | 4320       | 4050        | 4190   | 4320-4050 cal. BC  | Dates contemporary with later rice dates                                                                                                                                               | Oryza, Setaria                                         | Nakamura (2007)                                                                       |
| Chengtoushan                                               | Henan            | 坡头山          | Tangjiagang (Pre-Daxi)         | wood             | KIT-3043     | 5350 | 40    | 5350±40    | 4330       | 4050        | 4190   | 4330-4050 cal. BC  | Dates contemporary with later rice dates                                                                                                                                               | Oryza, Setaria                                         | Nakamura (2007)                                                                       |
| Chengtoushan                                               | Henan            | 坡头山          | Tangjiagang (Pre-Daxi)         | wood             | KIT-3045     | 5180 | 30    | 5180±30    | 4045       | 3955        | 4000   | 4045-3955 cal. BC  | Dates contemporary with latest rice dates                                                                                                                                              | Oryza, Setaria                                         | Nakamura (2007)                                                                       |
| Chengtoushan                                               | Henan            | 坡头山          | Tangjiagang (Pre-Daxi)         | charred fragment | KIT-3051     | 4900 | 30    | 4900±30    | 3760       | 3740        | 3750   | 3760-3740 cal. BC  | Dates are later than rice dates                                                                                                                                                        | Oryza, Setaria                                         | Nakamura (2007)                                                                       |
| Chengtoushan                                               | Henan            | 坡头山          | Tangjiagang (Pre-Daxi)         | wood             | KIT-3044     | 4890 | 70    | 4890±70    | 3930       | 3870        | 3900   | 3930-3870 cal. BC  | Dates contemporary with latest rice dates                                                                                                                                              | Oryza, Setaria                                         | Nakamura (2007)                                                                       |
| Chengtoushan                                               | Henan            | 坡头山          | Tangjiagang (Pre-Daxi)         | plant fragments  | KIT-3053     | 4830 | 50    | 4830±50    | 3710       | 3510        | 3610   | 3710-3510 cal. BC  | Dates are later than rice dates                                                                                                                                                        | Oryza, Setaria                                         | Nakamura (2007)                                                                       |
| Chengtoushan                                               | Henan            | 坡头山          | Early Daxi                     | rice grain       | NUTA2-2200   | 5620 | 60    | 5620±60    | 4590       | 4340        | 4465   | 4590-4340 cal. BC  | No Panicum present                                                                                                                                                                     | Oryza, Setaria                                         | Nasu et al., (2007)                                                                   |
| Chengtoushan                                               | Henan            | 坡头山          | Early Daxi                     | rice grain       | NUTA2-2195   | 5540 | 45    | 5540±45    | 4470       | 4320        | 4395   | 4470-4320 cal. BC  | As above                                                                                                                                                                               | Oryza, Setaria                                         | Nasu et al., (2007)                                                                   |
| Chengtoushan                                               | Henan            | 坡头山          | Early Daxi                     | rice grain       | NUTA2-2201   | 5490 | 50    | 5490±50    | 4450       | 4250        | 4350   | 4450-4250 cal. BC  | As above                                                                                                                                                                               | Oryza, Setaria                                         | Nasu et al., (2007)                                                                   |
| Chengtoushan                                               | Henan            | 坡头山          | Early Daxi                     | rice grain       | NUTA2-2199   | 5480 | 45    | 5480±45    | 4450       | 4240        | 4345   | 4450-4240 cal. BC  | As above                                                                                                                                                                               | Oryza, Setaria                                         | Nasu et al., (2007)                                                                   |
| Chengtoushan                                               | Henan            | 坡头山          | Early Daxi                     | rice grain       | NUTA2-2196   | 5400 | 45    | 5400±45    | 4350       | 4060        | 4205   | 4350-4060 cal. BC  | As above                                                                                                                                                                               | Oryza, Setaria                                         | Nasu et al., (2007)                                                                   |
| Chengtoushan                                               | Henan            | 坡头山          | Early Daxi                     | rice grain       | NUTA2-2202   | 5390 | 45    | 5390±45    | 4340       | 4050        | 4195   | 4340-4050 cal. BC  | As above                                                                                                                                                                               | Oryza, Setaria                                         | Nasu et al., (2007)                                                                   |
| Chengtoushan                                               | Henan            | 坡头山          | Early Daxi                     | rice grain       | NUTA2-2194   | 5380 | 60    | 5380±60    | 4340       | 4050        | 4195   | 4340-4050 cal. BC  | As above                                                                                                                                                                               | Oryza, Setaria                                         | Nasu et al., (2007)                                                                   |
| Chengtoushan                                               | Henan            | 坡头山          | Early Daxi                     | rice grain       | NUTA2-2193   | 5350 | 45    | 5350±45    | 4330       | 4040        | 4185   | 4330-4040 cal. BC  | As above                                                                                                                                                                               | Oryza, Setaria                                         | Nasu et al., (2007)                                                                   |
| Chengtoushan                                               | Henan            | 坡头山          | Early Daxi                     | rice grain       | NUTA2-2277   | 5245 | 55    | 5245±55    | 4240       | 3960        | 4100   | 4240-3960 cal. BC  | As above                                                                                                                                                                               | Oryza, Setaria                                         | Nasu et al., (2007)                                                                   |
| Chengtoushan                                               | Henan            | 坡头山          | Early Daxi                     | rice grain       | NUTA2-2278   | 5165 | 40    | 5165±40    | 4050       | 3800        | 3925   | 4050-3800 cal. BC  | As above                                                                                                                                                                               | Oryza, Setaria                                         | Nasu et al., (2007)                                                                   |
| Huitupo                                                    | Henan            | 灰土坡          | Middle Yangshao                | Not C14 dated    |              |      |       |            | 4000       | 3500        | 3750   | est. 4000-3500 BC  | Date estimated on cultural material.                                                                                                                                                   | Oryza, Setaria italica, Panicum millicearum            | Fuller and Qin (n.d.); Peking University Bailang project                              |
| Baigang                                                    | Henan            | 八里岗          | Early/Middle Yangshao          | rice grain       | BA111566     | 5350 | 25    | 5350±25    | 4320       | 4050        | 4185   | 4320-4050 cal. BC  |                                                                                                                                                                                        | Oryza, Setaria, Panicum                                | Deng et al. (2015)                                                                    |
| Baigang                                                    | Henan            | 八里岗          | Middle Yangshao                | rice grain       | BA081046     | 5085 | 35    | 5085±35    | 3970       | 3790        | 3880   | 3970-3790 cal. BC  |                                                                                                                                                                                        | Oryza, Setaria, Panicum                                | Deng et al. (2015)                                                                    |
| Baigang                                                    | Henan            | 八里岗          | Middle Yangshao                | rice grain       | BA081048     | 5035 | 35    | 5035±35    | 3950       | 3710        | 3830   | 3950-3710 cal. BC  |                                                                                                                                                                                        | Oryza, Setaria, Panicum                                | Deng et al. (2015)                                                                    |
| <b>SICHUAN CHINA (including initial spread of millets)</b> |                  |              |                                |                  |              |      |       |            |            |             |        |                    |                                                                                                                                                                                        |                                                        |                                                                                       |
| Yingpanshan                                                | Sichuan          | 营盘山          | Pre-Baodun - Majiayao          | No date          |              |      |       |            | 3200       | 2700        | 2950   | 3200-2700 cal. BC  | No rice is reported from this earlier site                                                                                                                                             | Setaria, Panicum                                       | Zhao and Chen J (2011); D'Alpoim Guedes and Butler (2014)                             |
| Haxiu                                                      | Sichuan          | 哈休           | Pre-Baodun                     | No date          |              |      |       |            | 3300       | 2700        | 3000   | est. 4000-3500 BC  | No rice is reported from this earlier site                                                                                                                                             | Setaria, Panicum                                       | D'Alpoim Guedes (2011); Zhao (2008)                                                   |
| Guizhuangqiao                                              | Sichuan          | 桂园桥          | Pre-Baodun                     | No date          |              |      |       |            | 3000       | 2700        | 2850   | 3000-2700 cal. BC  | No rice is reported from this earlier site                                                                                                                                             | Setaria, Panicum                                       | D'Alpoim Guedes and Butler (2014); Aba et al. (2007)                                  |
| Baodun                                                     | Sichuan          | 宝墩           | Baodun Phase 1                 | rice grain       | BA110058     | 4060 | 30    | 4060±30    | 2840       | 2480        | 2660   | est. 4000-3500 BC  |                                                                                                                                                                                        | Oryza, Setaria                                         | D'Alpoim Guedes and Butler (2014); D'Alpoim et al. (2013b)                            |
| Baodun                                                     | Sichuan          | 宝墩           | Baodun Phase 1                 | rice grain       | BA110062     | 4015 | 35    | 4015±35    | 2630       | 2460        | 2545   | est. 4000-3500 BC  |                                                                                                                                                                                        | Oryza, Setaria                                         | D'Alpoim Guedes and Butler (2014); D'Alpoim et al. (2013b)                            |

| Site   | Province | Local Script | Culture        | C14 Material | Code     | Date | Error | Date    | Cal. Start | Cal. Finish | Median | Calibrated 2 sigma | Comments | Crops          | References                                                 |
|--------|----------|--------------|----------------|--------------|----------|------|-------|---------|------------|-------------|--------|--------------------|----------|----------------|------------------------------------------------------------|
| Baodun | Sichuan  | 宝墩           | Baodun Phase 1 | rice grain   | BA110049 | 4010 | 50    | 4010±50 | 2840       | 2340        | 2590   | est. 4000-3500 BC  |          | Oryza, Setaria | D'Alpoim Guedes and Butler (2014); D'Alpoim et al. (2013b) |
| Baodun | Sichuan  | 宝墩           | Baodun Phase 1 | rice grain   | BA110061 | 4005 | 30    | 4005±30 | 2580       | 2460        | 2520   | est. 4000-3500 BC  |          | Oryza, Setaria | D'Alpoim Guedes and Butler (2014); D'Alpoim et al. (2013b) |
| Baodun | Sichuan  | 宝墩           | Baodun Phase 1 | rice grain   | BA110059 | 4000 | 30    | 4000±30 | 2580       | 2460        | 2520   | est. 4000-3500 BC  |          | Oryza, Setaria | D'Alpoim Guedes and Butler (2014); D'Alpoim et al. (2013b) |
| Baodun | Sichuan  | 宝墩           | Baodun Phase 1 | rice grain   | BA110047 | 3890 | 35    | 3890±35 | 2480       | 2230        | 2355   | est. 4000-3500 BC  |          | Oryza, Setaria | D'Alpoim Guedes and Butler (2014); D'Alpoim et al. (2013b) |
| Baodun | Sichuan  | 宝墩           | Baodun Phase 1 | rice grain   | BA110060 | 3885 | 30    | 3885±30 | 2470       | 2280        | 2375   | est. 4000-3500 BC  |          | Oryza, Setaria | D'Alpoim Guedes and Butler (2014); D'Alpoim et al. (2013b) |
| Baodun | Sichuan  | 宝墩           | Baodun Phase 1 | rice grain   | BA111215 | 3840 | 25    | 3840±25 | 2460       | 2200        | 2330   | est. 4000-3500 BC  |          | Oryza, Setaria | D'Alpoim Guedes and Butler (2014); D'Alpoim et al. (2013b) |
| Baodun | Sichuan  | 宝墩           | Baodun Phase 1 | rice grain   | BA110048 | 3830 | 30    | 3830±30 | 2460       | 2150        | 2305   | est. 4000-3500 BC  |          | Oryza, Setaria | D'Alpoim Guedes and Butler (2014); D'Alpoim et al. (2013b) |
| Baodun | Sichuan  | 宝墩           | Baodun Phase 1 | rice grain   | BA110052 | 3830 | 30    | 3830±30 | 2460       | 2150        | 2305   | est. 4000-3500 BC  |          | Oryza, Setaria | D'Alpoim Guedes and Butler (2014); D'Alpoim et al. (2013b) |
| Baodun | Sichuan  | 宝墩           | Baodun Phase 1 | rice grain   | BA111219 | 3735 | 20    | 3735±20 | 2210       | 2040        | 2125   | est. 4000-3500 BC  |          | Oryza, Setaria | D'Alpoim Guedes and Butler (2014); D'Alpoim et al. (2013b) |
| Baodun | Sichuan  | 宝墩           | Baodun Phase 1 | rice grain   | BA110050 | 3730 | 30    | 3730±30 | 2270       | 2030        | 2150   | est. 4000-3500 BC  |          | Oryza, Setaria | D'Alpoim Guedes and Butler (2014); D'Alpoim et al. (2013b) |
| Baodun | Sichuan  | 宝墩           | Baodun Phase 1 | rice grain   | BA110051 | 3705 | 30    | 3705±30 | 2200       | 1980        | 2090   | est. 4000-3500 BC  |          | Oryza, Setaria | D'Alpoim Guedes and Butler (2014); D'Alpoim et al. (2013b) |
