# Supplementary material
Source: publisher figshare collection journal article supplement (https://brill.figshare.com/articles/dataset/_/5441608)
Supplement: Supplementary file 5 [file 1]

Table S4. Sites with evidence for the spread of millets (and rice) into Western China, Tibet, Central Asia, Southeast Asia, the Russian Far East, Korea and Japan

|                                    | Province    | Local Script | Culture                 | C14 Material                       | Code        | Date | Error | Date    | Cal. Start | Cal. Finish | Median | Calibrated 2 sigma | Comments                                                                                                                                                                             | Crops                               | References                                                                                  |
|------------------------------------|-------------|--------------|-------------------------|------------------------------------|-------------|------|-------|---------|------------|-------------|--------|--------------------|--------------------------------------------------------------------------------------------------------------------------------------------------------------------------------------|-------------------------------------|---------------------------------------------------------------------------------------------|
| NORTHWEST SPREAD INTO CENTRAL ASIA |             |              |                         |                                    |             |      |       |         |            |             |        |                    |                                                                                                                                                                                      |                                     |                                                                                             |
| Huaren                             | Qinghai     | 胡然           | Yangshao                | Panicum                            | BA120182    | 4530 | 60    | 4530±60 | 3500       | 3020        | 3260   | 3500-3020 cal. BC  |                                                                                                                                                                                      | Setaria and Panicum                 | Chen et al. (2015)                                                                          |
| Gaoyangling                        | Qinghai     | 高阳岭          | Majayao                 | Setaria                            | Beta-297655 | 4410 | 40    | 4410±40 | 3330       | 2910        | 3120   | 3330-2910 cal. BC  |                                                                                                                                                                                      | Setaria and Panicum                 | Chen et al. (2015)                                                                          |
| Gaoyangling                        | Qinghai     | 高阳岭          | Majayao                 | Setaria                            | BA110889    | 4370 | 25    | 4370±25 | 3090       | 2910        | 3000   | 3090-2910 cal. BC  |                                                                                                                                                                                      | Setaria and Panicum                 | Chen et al. (2015)                                                                          |
| Laila                              | Qinghai     | 雷来           | Early-mid Majayao       | Charcoal                           | UG1010-58   | 4408 | 55    | 4408±55 | 3340       | 2900        | 3120   | 3340-2900 cal. BC  |                                                                                                                                                                                      | Setaria                             | Dong et al. (2013); Liu et al. (2008 site 53, pp. 166)                                      |
| Hongjiazui                         | Qinghai     | 红崖嘴          | Majayao                 | Setaria                            | BA110889    | 4395 | 30    | 4395±30 | 3100       | 2910        | 3005   | 3100-2910 cal. BC  |                                                                                                                                                                                      | Setaria and Panicum                 | Chen et al. (2015)                                                                          |
| Liuwanlingchang                    | Qinghai     | 柳湾林场         | Majayao                 | Setaria                            | Beta-24458  | 4110 | 30    | 4110±30 | 2870       | 2570        | 2720   | 2870-2570 cal. BC  |                                                                                                                                                                                      | Setaria and Panicum                 | Chen et al. (2015)                                                                          |
| Yuanyangchi                        | NW Gansu    | 袁阳池          | Manichang/Baranish      | No Date                            |             |      |       | 2400    | 2000       | 2200        |        | est. 2400-2000 BC  | Wheat is absent and not recorded from this site                                                                                                                                      | Setaria                             | Li et al. (2008)                                                                            |
| Koshikou                           | NW Gansu    | 河西营          | Majayao (Machang Type)  | No Date                            |             |      |       | 2300    | 2000       | 2150        |        | est. 2300-2000 BC  | Wheat is absent and not recorded from this site                                                                                                                                      | Mainly Panicum, some Setaria        | Zhou et al. (2012); Zhou et al. (2016); Dodson et al. (2013)                                |
| Xuoshiliang                        | North Gansu | 火石梁          | Siba Culture            | Triticum grain                     | OZK603      | 3636 | 44    | 3636±44 | 2135       | 1895        | 2015   | est. 2135-1895 BC  | Earliest secure date for wheat within China                                                                                                                                          | Triticum, Hordeum, Panicum, Setaria | Dodson et al. (2013)                                                                        |
| Xiaohu Cemetery                    | Xinjiang    | 小河墓地         | Xintala                 | Millet seed                        | BA05804     | 3545 | 40    | 3545±40 | 2020       | 1750        | 1885   | 2020-1750 cal. BC  | N.B. Only dates on plant remains are presented here. Dates cited within Yang et al. (2014) are at the 5730 h.l. The dates given here follow Flad et al. (2010) and use the 5568 h.l. | Triticum and Panicum                | Flad et al. (2010); Li-J-F et al. (2013); Yang et al. (2014)                                |
| Xiaohu Cemetery                    | Xinjiang    | 小河墓地         | Xintala                 | Wheat grain                        | BA05803     | 3375 | 40    | 3375±40 | 1770       | 1530        | 1650   | 1770-1530 cal. BC  |                                                                                                                                                                                      | Triticum and Panicum                | Flad et al. (2010); Li-J-F et al. (2013); Yang et al. (2014)                                |
| Xiaohu Cemetery                    | Xinjiang    | 小河墓地         | Xintala                 | Wheat grain                        | BA05794     | 3305 | 40    | 3305±40 | 1690       | 1500        | 1595   | 1690-1500 cal. BC  |                                                                                                                                                                                      | Triticum and Panicum                | Flad et al. (2010); Li-J-F et al. (2013); Yang et al. (2014)                                |
| Xiaohu Cemetery                    | Xinjiang    | 小河墓地         | Xintala                 | Millet seed                        | BA05795     | 3200 | 40    | 3200±40 | 1610       | 1400        | 1505   | 1610-1400 cal. BC  |                                                                                                                                                                                      | Triticum and Panicum                | Flad et al. (2010); Li-J-F et al. (2013); Yang et al. (2014)                                |
| Xiaohu Cemetery                    | Xinjiang    | 小河墓地         | Xintala                 | Millet seed                        | BA05796     | 3290 | 40    | 3290±40 | 1670       | 1450        | 1560   | 1670-1450 cal. BC  |                                                                                                                                                                                      | Triticum and Panicum                | Flad et al. (2010); Li-J-F et al. (2013); Yang et al. (2014)                                |
| Xiaohu Cemetery                    | Xinjiang    | 小河墓地         | Xintala                 | Wheat grain                        | BA05791     | 3225 | 30    | 3225±30 | 1610       | 1420        | 1515   | 1610-1420 cal. BC  |                                                                                                                                                                                      | Triticum and Panicum                | Flad et al. (2010); Li-J-F et al. (2013); Yang et al. (2014)                                |
| Xiaohu Cemetery                    | Xinjiang    | 小河墓地         | Xintala                 | Millet seed                        | BA05793     | 3240 | 40    | 3240±40 | 1620       | 1430        | 1525   | 1620-1430 cal. BC  |                                                                                                                                                                                      | Triticum and Panicum                | Flad et al. (2010); Li-J-F et al. (2013); Yang et al. (2014)                                |
| Xintala                            | Xinjiang    | 新塔拉          | Xintala                 | wheat grain                        | OZM451      | 3435 | 35    | 3435±35 | 1880       | 1640        | 1760   | 1880-1640 cal. BC  |                                                                                                                                                                                      | Triticum, Hordeum and Panicum       | Dodson et al. (2013); Zhao et al. (2013); Debaine-Francfort (1988)                          |
| Xintala                            | Xinjiang    | 新塔拉          | Xintala                 | wheat grain                        | OZK663      | 3430 | 50    | 3430±50 | 1890       | 1620        | 1755   | 1890-1620 cal. BC  |                                                                                                                                                                                      | Triticum, Hordeum and Panicum       | Dodson et al. (2013); Zhao et al. (2013); Debaine-Francfort (1988)                          |
| Xintala                            | Xinjiang    | 新塔拉          | Xintala                 | wheat grain                        | OZK662      | 3435 | 50    | 3435±50 | 1890       | 1630        | 1760   | 1890-1630 cal. BC  |                                                                                                                                                                                      | Triticum, Hordeum and Panicum       | Dodson et al. (2013); Zhao et al. (2013); Debaine-Francfort (1988)                          |
| Xintala                            | Xinjiang    | 新塔拉          | Xintala                 | wheat grain                        | OZK437      | 3515 | 50    | 3515±50 | 1980       | 1690        | 1835   | 1980-1690 cal. BC  |                                                                                                                                                                                      | Triticum, Hordeum and Panicum       | Dodson et al. (2013); Zhao et al. (2013); Debaine-Francfort (1988)                          |
| Begash 1a                          | Kazakhstan  | Бегаш 1а     | Middle Bronze Age       | millet and wheat                   | Beta-266458 | 3840 | 40    | 3840±40 | 2470       | 2150        | 2310   | 2470-2150 cal. BC  | Dates are earliest for Panicum within Central Asia                                                                                                                                   | Triticum and Panicum                | Frachetti et al. (2010); Spengler et al. (2014)                                             |
| Begash 1a                          | Kazakhstan  | Бегаш 1а     | Middle Bronze Age       | wood charcoal                      | Beta-266459 | 3760 | 40    | 3760±40 | 2300       | 2030        | 2155   | 2300-2030 cal. BC  |                                                                                                                                                                                      | Triticum and Panicum                | Frachetti et al. (2010); Spengler et al. (2014)                                             |
| Begash 1a                          | Kazakhstan  | Бегаш 1а     | Middle Bronze Age       | wood charcoal                      | Beta-266460 | 3740 | 40    | 3740±40 | 2290       | 2020        | 2155   | 2290-2020 cal. BC  |                                                                                                                                                                                      | Triticum and Panicum                | Frachetti et al. (2010); Spengler et al. (2014)                                             |
| Begash 1a                          | Kazakhstan  | Бегаш 1а     | Middle Bronze Age       | wood charcoal                      | Beta-266457 | 3720 | 40    | 3720±40 | 2280       | 1980        | 2130   | 2280-1980 cal. BC  |                                                                                                                                                                                      | Triticum and Panicum                | Frachetti et al. (2010); Spengler et al. (2014)                                             |
| Tarbata 2a                         | Kazakhstan  | Тарбата 2а   | Late Bronze Age         | wood charcoal                      | OS-93053    | 3150 | 35    | 3150±35 | 1510       | 1300        | 1405   | 1510-1300 cal. BC  | Dates are earliest for Setaria within Central Asia                                                                                                                                   | Triticum, Hordeum, Panicum, Setaria | Spengler et al. (2014)                                                                      |
| Tarbata 2a                         | Kazakhstan  | Тарбата 2а   | Late Bronze Age         | barley                             | OS-92277    | 3090 | 40    | 3090±40 | 1440       | 1230        | 1335   | 1440-1230 cal. BC  |                                                                                                                                                                                      | Triticum, Hordeum, Panicum, Setaria | Spengler et al. (2014)                                                                      |
| Tarbata 2a                         | Kazakhstan  | Тарбата 2а   | Late Bronze Age         | barley                             | OS-91990    | 3030 | 35    | 3030±35 | 1410       | 1130        | 1270   | 1410-1130 cal. BC  |                                                                                                                                                                                      | Triticum, Hordeum, Panicum, Setaria | Spengler et al. (2014)                                                                      |
| SOUTHWEST CHINA: SICHUAN, YUNNAN   |             |              |                         |                                    |             |      |       |         |            |             |        |                    |                                                                                                                                                                                      |                                     |                                                                                             |
| Haxu                               | Sichuan     | 哈休           | Pre-Baodun              | No date                            |             |      |       |         | 3300       | 2700        | 3000   | est. 3300-3000 BC  | As with Yingpanshan only millets with initial agricultural spread                                                                                                                    | Setaria, Panicum                    | D'Alpoim Guedes 2011; Zhao 2008                                                             |
| Yingpanshan                        | Sichuan     | 营盘山          | Pre-Baodun - Majayao    | No date recorded                   |             |      |       |         | 3500       | 2700        | 3100   | 3500-2700 cal. BC  | As above only millets with initial spread                                                                                                                                            | Setaria, Panicum                    | Zhao 21 and Chen J (2011)                                                                   |
| Yingpanshan                        | Sichuan     | 营盘山          | Pre-Baodun              | No date                            |             |      |       |         | 3000       | 2700        | 2850   | 3000-2700 cal. BC  | No rice is reported from this earlier site                                                                                                                                           | Oryza, Setaria                      | d'Alpoim Guedes and Butler (2014); d'Alpoim et al. (2013b)                                  |
| Baodun                             | Sichuan     | 宝墩           | Baodun Phase 1          | rice grain                         | BA110058    | 4060 | 30    | 4060±30 | 2840       | 2480        | 2660   | 2840-2480 cal. BC  |                                                                                                                                                                                      | Oryza, Setaria                      | d'Alpoim Guedes and Butler (2014); d'Alpoim et al. (2013b)                                  |
| Baodun                             | Sichuan     | 宝墩           | Baodun Phase 1          | rice grain                         | BA110062    | 4015 | 35    | 4015±35 | 2630       | 2460        | 2545   | 2630-2460 cal. BC  |                                                                                                                                                                                      | Oryza, Setaria                      | d'Alpoim Guedes and Butler (2014); d'Alpoim et al. (2013b)                                  |
| Baodun                             | Sichuan     | 宝墩           | Baodun Phase 1          | rice grain                         | BA110049    | 4010 | 50    | 4010±50 | 2840       | 2340        | 2590   | 2840-2340 cal. BC  |                                                                                                                                                                                      | Oryza, Setaria                      | d'Alpoim Guedes and Butler (2014); d'Alpoim et al. (2013b)                                  |
| Baodun                             | Sichuan     | 宝墩           | Baodun Phase 1          | rice grain                         | BA110061    | 4005 | 30    | 4005±30 | 2580       | 2460        | 2520   | 2580-2460 cal. BC  |                                                                                                                                                                                      | Oryza, Setaria                      | d'Alpoim Guedes and Butler (2014); d'Alpoim et al. (2013b)                                  |
| Baodun                             | Sichuan     | 宝墩           | Baodun Phase 1          | rice grain                         | BA110059    | 4000 | 30    | 4000±30 | 2580       | 2460        | 2520   | 2580-2460 cal. BC  |                                                                                                                                                                                      | Oryza, Setaria                      | d'Alpoim Guedes and Butler (2014); d'Alpoim et al. (2013b)                                  |
| Baodun                             | Sichuan     | 宝墩           | Baodun Phase 1          | rice grain                         | BA110047    | 3890 | 35    | 3890±35 | 2480       | 2230        | 2355   | 2480-2230 cal. BC  | Earliest secure date for rice within Sichuan                                                                                                                                         | Oryza, Setaria                      | d'Alpoim Guedes and Butler (2014); d'Alpoim et al. (2013b)                                  |
| Baodun                             | Sichuan     | 宝墩           | Baodun Phase 1          | rice grain                         | BA110060    | 3885 | 30    | 3885±30 | 2470       | 2280        | 2375   | 2470-2280 cal. BC  |                                                                                                                                                                                      | Oryza, Setaria                      | d'Alpoim Guedes and Butler (2014); d'Alpoim et al. (2013b)                                  |
| Baodun                             | Sichuan     | 宝墩           | Baodun Phase 1          | rice grain                         | BA111215    | 3840 | 25    | 3840±25 | 2460       | 2200        | 2330   | 2460-2200 cal. BC  |                                                                                                                                                                                      | Oryza, Setaria                      | d'Alpoim Guedes and Butler (2014); d'Alpoim et al. (2013b)                                  |
| Baodun                             | Sichuan     | 宝墩           | Baodun Phase 1          | rice grain                         | BA110048    | 3830 | 30    | 3830±30 | 2460       | 2150        | 2305   | 2460-2150 cal. BC  |                                                                                                                                                                                      | Oryza, Setaria                      | d'Alpoim Guedes and Butler (2014); d'Alpoim et al. (2013b)                                  |
| Baodun                             | Sichuan     | 宝墩           | Baodun Phase 1          | rice grain                         | BA110052    | 3830 | 30    | 3830±30 | 2460       | 2150        | 2305   | 2460-2150 cal. BC  |                                                                                                                                                                                      | Oryza, Setaria                      | d'Alpoim Guedes and Butler (2014); d'Alpoim et al. (2013b)                                  |
| Baodun                             | Sichuan     | 宝墩           | Baodun Phase 1          | rice grain                         | BA111219    | 3735 | 20    | 3735±20 | 2210       | 2040        | 2125   | 2210-2040 cal. BC  |                                                                                                                                                                                      | Oryza, Setaria                      | d'Alpoim Guedes and Butler (2014); d'Alpoim et al. (2013b)                                  |
| Baodun                             | Sichuan     | 宝墩           | Baodun Phase 1          | rice grain                         | BA110050    | 3730 | 30    | 3730±30 | 2270       | 2030        | 2150   | 2270-2030 cal. BC  |                                                                                                                                                                                      | Oryza, Setaria                      | d'Alpoim Guedes and Butler (2014); d'Alpoim et al. (2013b)                                  |
| Baodun                             | Sichuan     | 宝墩           | Baodun Phase 1          | rice grain                         | BA110051    | 3705 | 30    | 3705±30 | 2200       | 1980        | 2090   | 2200-1980 cal. BC  |                                                                                                                                                                                      | Oryza, Setaria                      | d'Alpoim Guedes and Butler (2014); d'Alpoim et al. (2013b)                                  |
| Changdu Karuo/Qamdo Karuo          | Tibet       | 昌都卡若         | Karuo                   | Foxtail Millet                     | BA111228    | 4115 | 25    | 4115±25 | 2870       | 2570        | 2720   | 2870-2570 cal. BC  | Dates on short-lived material were conducted by d'Alpoim Guedes et al. 2014.                                                                                                         | Mainly Setaria/some Panicum         | d'Alpoim et al. 2014; d'Alpoim Guedes and Butler (2014); CPAM and Sichuan University (1985) |
| Changdu Karuo/Qamdo Karuo          | Tibet       | 昌都卡若         | Karuo                   | Foxtail Millet                     | BA111229    | 3995 | 25    | 3995±25 | 2580       | 2460        | 2520   | 2580-2460 cal. BC  | Dates on short-lived material were conducted by d'Alpoim Guedes et al. 2014.                                                                                                         | Mainly Setaria/some Panicum         | d'Alpoim et al. 2014; d'Alpoim Guedes and Butler (2014); CPAM and Sichuan University (1985) |
| Changdu Karuo/Qamdo Karuo          | Tibet       | 昌都卡若         | Karuo                   | Broomcorn millet                   | Beta325960  | 3980 | 40    | 3980±40 | 2620       | 2340        | 2480   | 2620-2340 cal. BC  | Dates on short-lived material were conducted by d'Alpoim Guedes et al. 2014.                                                                                                         | Mainly Setaria/some Panicum         | d'Alpoim et al. 2014; d'Alpoim Guedes and Butler (2014); CPAM and Sichuan University (1985) |
| Changdu Karuo/Qamdo Karuo          | Tibet       | 昌都卡若         | Karuo                   | Foxtail Millet                     | BA111226    | 3910 | 25    | 3910±25 | 2480       | 2300        | 2390   | 2480-2300 cal. BC  | Dates on short-lived material were conducted by d'Alpoim Guedes et al. 2014.                                                                                                         | Mainly Setaria/some Panicum         | d'Alpoim et al. 2014; d'Alpoim Guedes and Butler (2014); CPAM and Sichuan University (1985) |
| Changdu Karuo/Qamdo Karuo          | Tibet       | 昌都卡若         | Karuo                   | Indet. Seed                        | BA111231    | 3895 | 25    | 3895±25 | 2470       | 2290        | 2380   | 2470-2290 cal. BC  | Dates on short-lived material were conducted by d'Alpoim Guedes et al. 2014.                                                                                                         | Mainly Setaria/some Panicum         | d'Alpoim et al. 2014; d'Alpoim Guedes and Butler (2014); CPAM and Sichuan University (1985) |
| Baliyuncun                         | Yunnan      | 白平村          | Baliyuncun Culture      | charcoal                           | ZK-0220     | 3660 | 85    | 3660±85 | 2290       | 1860        | 2075   | 2290-1860 cal. BC  | Date in Yao (2010) is at the 5730 h.l., that within Rispoli (2007) gives both 5730 and 5568 h.l.                                                                                     | Oryza, Panicum and Setaria          | Yong and Yunnan Prov. Museum (1981); Dal Martello et al. (in prep.); Rispoli (2007)         |
| Baliyuncun                         | Yunnan      | 白平村          | Baliyuncun Culture      | charcoal                           | ZK-0330     | 3570 | 85    | 3570±85 | 2190       | 1690        | 1940   | 2190-1690 cal. BC  |                                                                                                                                                                                      | Oryza, Panicum and Setaria          | Yong and Yunnan Prov. Museum (1981); Dal Martello et al. (in prep.); Rispoli (2007)         |
| Dadunzi                            | Yunnan      | 大墩子          |                         | charcoal                           | ZK-0229     | 3119 | 90    | 3119±90 | 1620       | 1120        | 1370   | 1620-1120 cal. BC  | Date in Yao (2010) and in Zhang and Hung (2010) are likely to be 5730 h.l. and the calibrated date from Rispoli (2007) implies this. Converted here to 5568 h.l.                     | Oryza, Panicum and Setaria          | Jin H. et al. (2014)                                                                        |
| Haimenkou                          | Yunnan      | 海门口          | Neolithic (T1003-10-51) | rice grain                         | BA-         | 3380 | 25    | 3380±25 | 1750       | 1620        | 1685   | 1750-1620 cal. BC  | Rice and Foxtail millet present in earliest levels                                                                                                                                   | Oryza, Setaria                      | Xue (2010); Jin H (2014); d'Alpoim Guedes and Butler (2014); Xiao (1995)                    |
| Haimenkou                          | Yunnan      | 海门口          | Neolithic (T1003-9-52)  | rice grain                         | BA-         | 3275 | 35    | 3275±35 | 1640       | 1450        | 1545   | 1640-1450 cal. BC  |                                                                                                                                                                                      | Oryza, Setaria                      | Xue (2010); Jin H (2014); d'Alpoim Guedes and Butler (2014); Xiao (1995)                    |
| Haimenkou                          | Yunnan      | 海门口          | Neolithic (T1003-8-52)  | millet grains (Setaria italica x3) | BA-         | 3230 | 40    | 3230±40 | 1620       | 1420        | 1520   | 1620-1420 cal. BC  |                                                                                                                                                                                      | Oryza, Setaria                      | Xue (2010); Jin H (2014); d'Alpoim Guedes and Butler (2014); Xiao (1995)                    |
| Haimenkou                          | Yunnan      | 海门口          | Neolithic (T1003-8-52)  | millet grains (Setaria italica x3) | BA-         | 3275 | 35    | 3275±35 | 1640       | 1450        | 1545   | 1640-1450 cal. BC  |                                                                                                                                                                                      | Oryza, Setaria                      | Xue (2010); Jin H (2014); d'Alpoim Guedes and Butler (2014); Xiao (1                        |

| Site                                                               | Province  | Local Script | Culture                      | C14 Material                             | Code        | Date          | Error | Date     | Cal. Start | Cal. Finish | Median | Calibrated 2 sigma | Comments                                                                                                                                                                                                                                                                                                                         | Crops                                                                                       | References                                                                                    |
|--------------------------------------------------------------------|-----------|--------------|------------------------------|------------------------------------------|-------------|---------------|-------|----------|------------|-------------|--------|--------------------|----------------------------------------------------------------------------------------------------------------------------------------------------------------------------------------------------------------------------------------------------------------------------------------------------------------------------------|---------------------------------------------------------------------------------------------|-----------------------------------------------------------------------------------------------|
| Haimeimkou                                                         | Yunnan    | 海门口          | Bronze Age (T1005-5-54)      | rice grain                               | BA-         | 2960          | 25    | 2960±25  | 1270       | 1050        | 1160   | 1270-1050 cal. BC  | As above                                                                                                                                                                                                                                                                                                                         | As above                                                                                    | Li and Min (2014); Yue Y (2010); Jin H (2014)                                                 |
| Haimeimkou                                                         | Yunnan    | 海门口          | Bronze Age (T1004-5-56)      | millet ( <i>Setaria italica</i> x3)      | BA-         | 2435          | 20    | 2435±20  | 760        | 400         | 580    | 760-400 cal. BC    | As above                                                                                                                                                                                                                                                                                                                         | As above                                                                                    | Li and Min (2014); Yue Y (2010); Jin H (2014)                                                 |
| Haimeimkou                                                         | Yunnan    | 海门口          | Bronze Age (T1003-5-52)      | wheat grain                              | BA-         | 2445          | 35    | 2445±35  | 760        | 400         | 580    | 760-400 cal. BC    | As above                                                                                                                                                                                                                                                                                                                         | As above                                                                                    | Li and Min (2014); Yue Y (2010); Jin H (2014)                                                 |
| Haimeimkou                                                         | Yunnan    | 海门口          | Bronze Age (T1005-5-51)      | rice grain                               | BA-         | 2400          | 20    | 2400±20  | 540        | 400         | 470    | 540-400 cal. BC    | As above                                                                                                                                                                                                                                                                                                                         | As above                                                                                    | Li and Min (2014); Yue Y (2010); Jin H (2014)                                                 |
| Haimeimkou                                                         | Yunnan    | 海门口          | Bronze Age (T1003-4-52)      | wheat grain                              | BA-         | 2405          | 35    | 2405±35  | 750        | 390         | 570    | 750-390 cal. BC    | As above                                                                                                                                                                                                                                                                                                                         | As above                                                                                    | Li and Min (2014); Yue Y (2010); Jin H (2014)                                                 |
| Shifudong                                                          | Yunnan    | 石佛洞          |                              | Date available but could not be obtained |             |               |       |          | 1450       | 850         | 1150   | 1450-850 cal. BC   | Occurrence of rice and foxtail millet from earliest levels. Radiocarbon dating was conducted on the site and are available in the main site report but the authors have been unable to obtain this information.                                                                                                                  | Setaria and Oryza                                                                           | Zhao (2010); Jin H. et al. (2014); Liu and Dai (2008); Li, H. et al. (2016)                   |
| Gantuoan                                                           | Guangxi   | 感驮岩          | Contemporary with Late Shang | rice grain                               | DY-1014     | 3365          | 50    | 3365±50  | 1860       | 1510        | 1685   | 1860-1510 cal. BC  | It is unclear if the dates quoted by Zhang and Hung (2010) are at the 5730 h.l. However, as the majority of the dates where this can be checked used the 5730 h.l. those shown here have also been corrected to the 5568 h.l. NB. this site is often mispelt as Gantuoan.                                                        | Oryza, Panicum and Setaria                                                                  | Zhang and Hung (2010); ZGARAT and Napo Museum (2003)                                          |
| Gantuoan                                                           | Guangxi   | 感驮岩          | Contemporary with Late Shang | millet grain                             | DY-01015    | 3042          | 50    | 3042±50  | 1430       | 1120        | 1275   | 1430-1120 cal. BC  | As above                                                                                                                                                                                                                                                                                                                         | Oryza, Panicum and Setaria                                                                  | Zhang and Hung (2010); ATGZ & Napo Museum 2003                                                |
| Gantuoan                                                           | Guangxi   | 感驮岩          | Contemporary with Late Shang | rice grain                               | DY-1013     | 2801          | 50    | 2801±50  | 1110       | 830         | 970    | 1110-830 cal. BC   | As above                                                                                                                                                                                                                                                                                                                         | Oryza, Panicum and Setaria                                                                  | Zhang and Hung (2010); ATGZ & Napo Museum 2003                                                |
| <b>Mainland South China Coast (Spread of Rice without millets)</b> |           |              |                              |                                          |             |               |       |          |            |             |        |                    |                                                                                                                                                                                                                                                                                                                                  |                                                                                             |                                                                                               |
| Tanshishan                                                         | Fujian    | 昙石山          | Tanshishan Culture           | charcoal                                 | BA-04294    | 4120          | 30    | 4120±30  | 2670       | 2570        | 2720   | 2670-2570 cal. BC  | These charcoal dates appear significantly older than the original dates below but are internally consistent and therefore seem as reliable.                                                                                                                                                                                      | Oryza sativa. Noted to be in low numbers and hunting/shellfish still seen as more important | Fujian Provincial Museum (2010); Ma et al. (2016); Jiao (2013)                                |
| Tanshishan                                                         | Fujian    | 昙石山          | Tanshishan Culture           | charcoal                                 | BA-04295    | 4095          | 30    | 4095±30  | 2670       | 2500        | 2685   | 2670-2500 cal. BC  | As above                                                                                                                                                                                                                                                                                                                         | Oryza sativa                                                                                | Fujian Provincial Museum (2010); Ma et al. (2016); Jiao (2013)                                |
| Tanshishan                                                         | Fujian    | 昙石山          | Tanshishan Culture           | charcoal                                 | BA-04299    | 4095          | 40    | 4095±40  | 2670       | 2490        | 2680   | 2670-2490 cal. BC  | As above                                                                                                                                                                                                                                                                                                                         | Oryza sativa                                                                                | Fujian Provincial Museum (2010); Ma et al. (2016); Jiao (2013)                                |
| Tanshishan                                                         | Fujian    | 昙石山          | Tanshishan Culture           | charcoal                                 | BA-04292    | 4055          | 30    | 4055±30  | 2640       | 2480        | 2660   | 2640-2480 cal. BC  | As above                                                                                                                                                                                                                                                                                                                         | Oryza sativa                                                                                | Fujian Provincial Museum (2010); Ma et al. (2016); Jiao (2013)                                |
| Tanshishan                                                         | Fujian    | 昙石山          | Tanshishan Culture           | charcoal                                 | BA-04293    | 4023          | 30    | 4023±30  | 2630       | 2470        | 2550   | 2630-2470 cal. BC  | As above                                                                                                                                                                                                                                                                                                                         | Oryza sativa                                                                                | Fujian Provincial Museum (2010); Ma et al. (2016); Jiao (2013)                                |
| Tanshishan                                                         | Fujian    | 昙石山          | Tanshishan Culture           | charcoal                                 | BA-04280    | 3975          | 30    | 3975±30  | 2580       | 2350        | 2465   | 2580-2350 cal. BC  | As above                                                                                                                                                                                                                                                                                                                         | Oryza sativa                                                                                | Fujian Provincial Museum (2010); Ma et al. (2016); Jiao (2013)                                |
| Tanshishan                                                         | Fujian    | 昙石山          | Tanshishan Culture           | charcoal                                 | BA-04278    | 3970          | 40    | 3970±40  | 2580       | 2340        | 2460   | 2580-2340 cal. BC  | As above                                                                                                                                                                                                                                                                                                                         | Oryza sativa                                                                                | Fujian Provincial Museum (2010); Ma et al. (2016); Jiao (2013)                                |
| Tanshishan                                                         | Fujian    | 昙石山          | Tanshishan Culture           | charcoal                                 | BA-04289    | 3965          | 30    | 3965±30  | 2580       | 2340        | 2460   | 2580-2340 cal. BC  | As above                                                                                                                                                                                                                                                                                                                         | Oryza sativa                                                                                | Fujian Provincial Museum (2010); Ma et al. (2016); Jiao (2013)                                |
| Tanshishan                                                         | Fujian    | 昙石山          | Tanshishan Culture           | animal bone                              | ZK-0099     | 3498          | 70    | 3498±70  | 2020       | 1640        | 1830   | 2020-1640 cal. BC  | Dates shown with corrected h.l. as assumed that as with other dates in Zhang and Hung (2010) the 5730 h.l. was originally given. Seems very late.                                                                                                                                                                                | Oryza sativa                                                                                | Zhang and Hung (2010); Yan (1989); Lin (2005)                                                 |
| Tanshishan                                                         | Fujian    | 昙石山          | Tanshishan Culture           | shell                                    | ZK-0098     | 3002          | 60    | 3002±60  | 890        | 520         | 705    | 890-520 cal. BC    | It is assumed that as with other dates in Zhang and Hung (2010) the 5730 h.l. was originally given. The calibrated dates are therefore corrected for the 5568 h.l. and using Marine13 curve (AR 91±29). The two dates are not statistically contemporary. This being much younger.                                               | Oryza sativa                                                                                | Zhang and Hung (2010); Yan (1989); Lin (2005)                                                 |
| Zhuangbianshan                                                     | Fujian    | 庄边山          | Tanshishan Culture           | Shell                                    | Beta-347604 | 4350          | 30    | 4350±30  | 2490       | 2330        | 2410   | 2490-2330 cal. BC  | Large amounts of rice debussing waste identified from phytoliths. Date calibrated using Marine 13 (AR 92±40). Co-ordinates - 26.100848, 119.145843                                                                                                                                                                               | Oryza sativa (phytoliths in large numbers)                                                  | Ma et al. (2016)                                                                              |
| Huangguashan                                                       | Fujian    | 黄瓜山          | Huangguashan Culture         | Charcoal                                 | BA-02152    | 3920          | 60    | 3920±60  | 2580       | 2200        | 2390   | 2580-2200 cal. BC  | Date is regarded as start of site. However it appears anomalous                                                                                                                                                                                                                                                                  | Oryza sativa                                                                                | Jiao 2007 (table 33, 246); Jiao (2013)                                                        |
| Huangguashan                                                       | Fujian    | 黄瓜山          | Huangguashan Culture         | Charcoal (Layer 9)                       | NZA-10011   | 3687          | 60    | 3687±60  | 2280       | 1900        | 2090   | 2280-1900 cal. BC  | Dates for earliest levels are consistent                                                                                                                                                                                                                                                                                         | Oryza sativa                                                                                | Jiao 2007 (table 33, 246); Jiao (2013)                                                        |
| Huangguashan                                                       | Fujian    | 黄瓜山          | Huangguashan Culture         | Charcoal (Layer 9)                       | BA-02115    | 3640          | 60    | 3640±60  | 2200       | 1830        | 2015   | 2640-1830 cal. BC  | As above                                                                                                                                                                                                                                                                                                                         | Oryza sativa                                                                                | Jiao 2007 (table 33, 246); Jiao (2013)                                                        |
| Huangguashan                                                       | Fujian    | 黄瓜山          | Huangguashan Culture         | Charcoal (Layer 9)                       | NZA-10010   | 3634          | 55    | 3634±55  | 2200       | 1870        | 2035   | 2200-1870 cal. BC  | As above                                                                                                                                                                                                                                                                                                                         | Oryza sativa                                                                                | Jiao 2007 (table 33, 246); Jiao (2013)                                                        |
| Huangguashan                                                       | Fujian    | 黄瓜山          | Huangguashan Culture         | Charcoal (Layer 9)                       | BA-02114    | 3620          | 100   | 3620±100 | 2290       | 1690        | 1990   | 2290-1690 cal. BC  | As above                                                                                                                                                                                                                                                                                                                         | Oryza sativa                                                                                | Jiao 2007 (table 33, 246); Jiao (2013)                                                        |
| Huangguashan                                                       | Fujian    | 黄瓜山          | Huangguashan Culture         | Charcoal (Layer 4)                       | BA-02156    | 3440          | 60    | 3440±60  | 1910       | 1610        | 1760   | 1910-1610 cal. BC  | Later levels are consistent. Jiao (2007, 246) suggests that wheat and barley might be brought into historical cultural layers from lower levels but seems probable given the early date that they are intrusive.                                                                                                                 | Oryza sativa, probably intrusive Hordeum x1, also Triticum x7 in historical layer 2         | Jiao 2007 (table 33, 246); Jiao (2013)                                                        |
| Huangguashan                                                       | Fujian    | 黄瓜山          | Huangguashan Culture         | Charcoal (Layer 4)                       | BA-02153    | 3430          | 80    | 3430±80  | 1940       | 1530        | 1735   | 1940-1530 cal. BC  | As above                                                                                                                                                                                                                                                                                                                         | As above                                                                                    | Jiao 2007 (table 33, 246); Jiao (2013)                                                        |
| Shixia                                                             | Hong Kong | 沙吓           | Early Neolithic              | No radiocarbon dates                     |             |               |       |          | 2500       | 2500        | 2500   | 2500-2500 cal. BC  | Date given as estimated within Zhang and Hung (2010).                                                                                                                                                                                                                                                                            | Oryza sativa. Only a single grain is recorded so should be regarded with some caution.      | Zhang and Hung (2010); Lu et al. (2006)                                                       |
| Shixia                                                             | Guangdong | 石峡           | Shixia phase (Phase 1)       | charcoal                                 | BK76024     | 4100          | 110   | 4100±110 | 2920       | 2340        | 2630   | 2920-2340 cal. BC  | Dates shown with corrected h.l. as assumed that as with other dates in Zhang and Hung (2010) the 5730 h.l. was originally given. This date is older than those from Xinghuaihe but broadly might be seen as representative of the earliest phase of Shixia Culture.                                                              | Oryza sativa                                                                                | Yang (1978); Zhang et al. (2006); Zhang and Hung (2010)                                       |
| Shixia                                                             | Guangdong | 石峡           | Shixia phase (Phase 3)       | charcoal                                 | BK75046     | 4207          | 90    | 4207±90  | 3030       | 2490        | 2760   | 3030-2490 cal. BC  | Dates shown with corrected h.l. as assumed that as with other dates in Zhang and Hung (2010) the 5730 h.l. was originally given. This date for phase 3 is not statistically contemporary and older than that for the oldest phase 1. It is likely that it is subject to the problems with dating old wood and therefore suspect. | Oryza sativa                                                                                | Yang (1978); Zhang et al. (2006); Zhang and Hung (2010)                                       |
| Shixia                                                             | Guangdong | 石峡           | Shixia phase (Phase 3)       | charcoal                                 | BK75050     | 3906          | 100   | 3906±100 | 2840       | 2040        | 2440   | 2840-2040 cal. BC  | Dates shown with corrected h.l. as assumed that as with other dates in Zhang and Hung (2010) the 5730 h.l. was originally given. This date is considered the most accurate for the Shixia culture as broadly contemporary with Xinghuaihe                                                                                        | Oryza sativa                                                                                | Yang (1978); Zhang et al. (2006); Zhang and Hung (2010)                                       |
| Shixia                                                             | Guangdong | 石峡           |                              | rice grain                               | Beta-397662 | 3810          | 30    | 3810±30  | 2340       | 2140        | 2240   | 2340-2140 cal. BC  | This the only direct date on rice from the site provides a suitable illustration of discrepancies with old charcoal dates which range from 200-500 years earlier than those on rice. It might also be noted this same study indicates that rice from the older site of Guye also in Guangdong was intrusive.                     | Oryza sativa                                                                                | Yang et al. (2016)                                                                            |
| Xinghuaihe                                                         | Guangdong | 杏花河          | Shixia phase                 | unknown                                  | unknown     | 3916          | 120   | 3916±120 | 2860       | 2030        | 2445   | 2860-2030 cal. BC  | Material and lab numbers are unknown. The dates again are assumed to originally be presented using the 5730 h.l. The dates are broadly contemporary and consistent with the younger charcoal dates from Shixia. But still should be regarded with some caution.                                                                  | Oryza sativa                                                                                | Zhang and Hung (2010); Xiang and Yao (2006); Zhang et al. (2008)                              |
| Xinghuaihe                                                         | Guangdong | 杏花河          | Shixia phase                 | unknown                                  | unknown     | 3916          | 220   | 3916±220 | 3010       | 1770        | 2390   | 3010-1770 cal. BC  | As above                                                                                                                                                                                                                                                                                                                         | Oryza sativa                                                                                | Zhang and Hung (2010); Xiang and Yao (2006); Zhang et al. (2008)                              |
| <b>TAIWAN (MILLETS AND RICE)</b>                                   |           |              |                              |                                          |             |               |       |          |            |             |        |                    |                                                                                                                                                                                                                                                                                                                                  |                                                                                             |                                                                                               |
| Nanguanlidong                                                      | Taiwan    | 南关里东         | Ta-p'en-keng                 | charcoal                                 | NTU-3974    | 4110          | 50    | 4110±50  | 2680       | 2490        | 2685   | 2680-2490 cal. BC  | It is unclear if the dates from NTU given in Hung and Carson (2014) citing Tsang et al. (2006) represent the 5568 or 5730 h.l. GX dates from Geochron Laboratories, USA would originally be given at the 5568 h.l. and have been treated as such. However they may have been converted to 5730 h.l.                              | Oryza sativa, Panicum and Setaria                                                           | Tsang et al. (2006:316-8); Zhang and Hung (2010)                                              |
| Nanguanli                                                          | Taiwan    | 南关里          | Ta-p'en-keng                 | charcoal                                 | NTU-3489    | 4080          | 50    | 4080±50  | 2670       | 2480        | 2675   | 2670-2480 cal. BC  | As above                                                                                                                                                                                                                                                                                                                         | Oryza sativa, Panicum and Setaria                                                           | Tsang et al. (2006:316-8); Hung and Carson (2014); Zhang and Hung (2010); Tsang et al. (2017) |
| Nanguanli                                                          | Taiwan    | 南关里          | Ta-p'en-keng                 | charcoal                                 | GK-27788    | 4040          | 40    | 4040±40  | 2640       | 2460        | 2650   | 2640-2460 cal. BC  | As above                                                                                                                                                                                                                                                                                                                         | Oryza sativa, Panicum and Setaria                                                           | Tsang et al. (2006:316-8); Hung and Carson (2014); Zhang and Hung (2010); Tsang et al. (2017) |
| Nanguanli                                                          | Taiwan    | 南关里          | Ta-p'en-keng                 | charcoal                                 | NTU-3452    | 3950          | 40    | 3950±40  | 2580       | 2300        | 2440   | 2580-2300 cal. BC  | As above. Slightly younger and raises questions as to the possibility of the old wood affect on the above dates. This date is thought broadly reliable.                                                                                                                                                                          | Oryza sativa, Panicum and Setaria                                                           | Tsang et al. (2006:316-8); Hung and Carson (2014); Zhang and Hung (2010); Tsang et al. (2017) |
| Nanguanli                                                          | Taiwan    | 南关里          | Ta-p'en-keng                 | charcoal                                 | GK-27329    | 3890          | 110   | 3890±110 | 2640       | 2030        | 2435   | 2640-2030 cal. BC  | As above                                                                                                                                                                                                                                                                                                                         | Oryza sativa, Panicum and Setaria                                                           | Tsang et al. (2006:316-8); Hung and Carson (2014); Zhang and Hung (2010); Tsang et al. (2017) |
| Nanguanli                                                          | Taiwan    | 南关里          | Ta-p'en-keng                 | charcoal                                 | GK-27787    | 3730          | 90    | 3730±90  | 2460       | 1910        | 2185   | 2460-1910 cal. BC  | As above. Notably somewhat younger but the larger error might bring it in-line to the two dates above.                                                                                                                                                                                                                           | Oryza sativa, Panicum and Setaria                                                           | Tsang et al. (2006:316-8); Hung and Carson (2014); Zhang and Hung (2010); Tsang et al. (2017) |
| Nanguanli                                                          | Taiwan    | 南关里          | Ta-p'en-keng                 | marine shell                             | GK-27327    | 4470          | 60    | 4470±60  | 2640       | 2410        | 2625   | 2640-2410 cal. BC  | Date corrected for the marine reservoir effect using Marine13 curve (AR 87±38) and is broadly in line with the older charcoal dates.                                                                                                                                                                                             | Oryza sativa, Panicum and Setaria                                                           | Tsang et al. (2006:316-8); Hung and Carson (2014); Zhang and Hung (2010); Tsang et al. (2017) |
| Nanguanli                                                          | Taiwan    | 南关里          | Ta-p'en-keng                 | marine shell                             | NTU-3493    | 4450          | 40    | 4450±40  | 2760       | 2400        | 2580   | 2760-2400 cal. BC  | As above                                                                                                                                                                                                                                                                                                                         | Oryza sativa, Panicum and Setaria                                                           | Tsang et al. (2006:316-8); Hung and Carson (2014); Zhang and Hung (2010); Tsang et al. (2017) |
| Nanguanli                                                          | Taiwan    | 南关里          | Ta-p'en-keng                 | marine shell                             | NTU-3496    | 4230          | 40    | 4230±40  | 2450       | 2100        | 2275   | 2450-2100 cal. BC  | As above. Broadly in line with younger dates                                                                                                                                                                                                                                                                                     | Oryza sativa, Panicum and Setaria                                                           | Tsang et al. (2006:316-8); Hung and Carson (2014); Zhang and Hung (2010); Tsang et al. (2017) |
| Nanguanli                                                          | Taiwan    | 南关里          | Ta-p'en-keng                 | marine shell                             | GK-27328    | 4190          | 50    | 4190±50  | 2410       | 2010        | 2210   | 2410-2010 cal. BC  | As above                                                                                                                                                                                                                                                                                                                         | Oryza sativa, Panicum and Setaria                                                           | Tsang et al. (2006:316-8); Hung and Carson (2014); Zhang and Hung (2010); Tsang et al. (2017) |
| Ken-ting                                                           | Taiwan    | 垦丁           | Ta-p'en-keng                 | None                                     |             |               |       |          | 2500       | 2500        | 2500   | 2500-2500 cal. BC  | No radiocarbon dates but generally cited as 4500 BP/2500 BC.                                                                                                                                                                                                                                                                     | Oryza sativa - impressions in pottery                                                       | Beardwood (2007: 213); Li K-C (1983: 1987)                                                    |
| <b>MAINLAND SE ASIA (SITES WITH MILLETS)</b>                       |           |              |                              |                                          |             |               |       |          |            |             |        |                    |                                                                                                                                                                                                                                                                                                                                  |                                                                                             |                                                                                               |
| Ni Khun Haeng                                                      | Thailand  | นิคมแห่ง     | Neolithic/Bronze Age         | unknown                                  | B-24459     | not available |       | ?        | 1301       | 900         | 1100.5 | 1301-900 cal. BC   | The date for sample B-24459 is 1301-900 BC but given as 1100-700 BC in Pigott et al. (2006)                                                                                                                                                                                                                                      | Oryza and Setaria                                                                           | Pigott et al. (2006); Natapintu (1991)                                                        |
| Non Mde La                                                         | Thailand  | โนนผด        | Neolithic                    | No Dates                                 |             |               |       |          | 2100       | 1800        | 1950   | 2100-1800 cal. BC  | No radiocarbon dates are available for this site.                                                                                                                                                                                                                                                                                | Setaria                                                                                     | Higham (1989: 269-274); Pigott et al. (2006); Weber et al. (2010)                             |
| Non Mak La                                                         | Thailand  | โนนผด        | Neolithic/Bronze Age         | No Dates                                 |             |               |       |          | 1500       | 1100        | 1300   | 1500-1100 cal. BC  | As above                                                                                                                                                                                                                                                                                                                         | Setaria                                                                                     | Higham (1989: 269-274); Pigott et al. (2006); Weber et al. (2010)                             |
| Non Pa Wai                                                         | Thailand  | โนนผด        | Neolithic                    | Foxtail Millet                           | No Lab Code | 3870          | 40    | 3870±40  | 2470       | 2200        | 2335   | 2470-2200 cal. BC  | No laboratory codes. Date is earliest date for southwest spread of Setaria.                                                                                                                                                                                                                                                      | Setaria                                                                                     | Weber et al. (2010)                                                                           |

| Site                      | Province         | Local Script | Culture        | C14 Material           | Code          | Date  | Error | Date      | Cal. Start | Cal. Finish | Median | Calibrated 2 sigma | Comments                                                                                                                                                                                                                                                                                                                                               | Crops                                                                                                                                                                                                   | References                                                                 |
|---------------------------|------------------|--------------|----------------|------------------------|---------------|-------|-------|-----------|------------|-------------|--------|--------------------|--------------------------------------------------------------------------------------------------------------------------------------------------------------------------------------------------------------------------------------------------------------------------------------------------------------------------------------------------------|---------------------------------------------------------------------------------------------------------------------------------------------------------------------------------------------------------|----------------------------------------------------------------------------|
| Khok Phanom Di (Layer 10) | Thailand         | ໄທພູນຳ       | Neolithic      | charcoal               | ANU-5487      | 4390  | 110   | 4390±110  | 3370       | 2700        | 3035   | 3370-2700 cal. BC  | dates is much older than other dates from the same layer. Suspect hearth deposits may be mixture of charcoal and clay that might contain "old" carbon. Has been dismissed.                                                                                                                                                                             | Rice from layer 10 (Thompson 1996)                                                                                                                                                                      | Thompson (1996); Maloney and McAlister (1990)                              |
| Khok Phanom Di (Layer 10) | Thailand         | ໄທພູນຳ       | Neolithic      | charcoal               | NZ-7063       | 4310  | 310   | 4310±310  | 3710       | 2050        | 2880   | 3710-2050 cal. BC  | Probably still slightly too old by comparison with other dates                                                                                                                                                                                                                                                                                         | Rice from layer 10 (Thompson 1996)                                                                                                                                                                      | Thompson (1996); Maloney and McAlister (1990)                              |
| Khok Phanom Di (Layer 10) | Thailand         | ໄທພູນຳ       | Neolithic      | charcoal               | ANU-5490      | 3730  | 100   | 3730±100  | 2460       | 1900        | 2180   | 2460-1900 cal. BC  | As above                                                                                                                                                                                                                                                                                                                                               | Rice from layer 10 (Thompson 1996)                                                                                                                                                                      | Thompson (1996); Maloney and McAlister (1990)                              |
| Khok Phanom Di (Layer 10) | Thailand         | ໄທພູນຳ       | Neolithic      | charcoal               | NZ-7060       | 3680  | 80    | 3680±80   | 2350       | 1770        | 2080   | 2350-1770 cal. BC  | As above                                                                                                                                                                                                                                                                                                                                               | Rice from layer 10 (Thompson 1996)                                                                                                                                                                      | Thompson (1996); Maloney and McAlister (1990)                              |
| Khok Phanom Di (Layer 10) | Thailand         | ໄທພູນຳ       | Neolithic      | charcoal               | ANU-5486      | 3610  | 80    | 3610±80   | 2270       | 1690        | 1980   | 2270-1690 cal. BC  | As above                                                                                                                                                                                                                                                                                                                                               | Rice from layer 10 (Thompson 1996)                                                                                                                                                                      | Thompson (1996); Maloney and McAlister (1990)                              |
| Khok Phanom Di (Layer 10) | Thailand         | ໄທພູນຳ       | Neolithic      | charcoal               | ANU-5488      | 3580  | 100   | 3580±100  | 2210       | 1660        | 1935   | 2210-1660 cal. BC  | Regarded as upper limit of probable date range                                                                                                                                                                                                                                                                                                         | Rice from layer 10 (Thompson 1996)                                                                                                                                                                      | Thompson (1996); Maloney and McAlister (1990)                              |
| Khok Phanom Di (Layer 10) | Thailand         | ໄທພູນຳ       | Neolithic      | charcoal               | ANU-5493      | 3560  | 120   | 3560±120  | 2280       | 1610        | 1945   | 2280-1610 cal. BC  | As above                                                                                                                                                                                                                                                                                                                                               | Rice from layer 10 (Thompson 1996)                                                                                                                                                                      | Thompson (1996); Maloney and McAlister (1990)                              |
| Khok Phanom Di (Layer 10) | Thailand         | ໄທພູນຳ       | Neolithic      | charcoal               | ANU-5491      | 3530  | 80    | 3530±80   | 2130       | 1660        | 1895   | 2130-1660 cal. BC  | As above                                                                                                                                                                                                                                                                                                                                               | Rice from layer 10 (Thompson 1996)                                                                                                                                                                      | Thompson (1996); Maloney and McAlister (1990)                              |
| Khok Phanom Di (Layer 10) | Thailand         | ໄທພູນຳ       | Neolithic      | charcoal               | ANU-5492      | 3480  | 110   | 3480±110  | 2140       | 1520        | 1830   | 2140-1520 cal. BC  | As above                                                                                                                                                                                                                                                                                                                                               | Rice from layer 10 (Thompson 1996)                                                                                                                                                                      | Thompson (1996); Maloney and McAlister (1990)                              |
| Khok Phanom Di (Layer 10) | Thailand         | ໄທພູນຳ       | Neolithic      | charcoal               | ANU-5489      | 3420  | 90    | 3420±90   | 1950       | 1500        | 1725   | 1950-1500 cal. BC  | As above                                                                                                                                                                                                                                                                                                                                               | Rice from layer 10 (Thompson 1996)                                                                                                                                                                      | Thompson (1996); Maloney and McAlister (1990)                              |
| Khok Phanom Di (Layer 10) | Thailand         | ໄທພູນຳ       | Neolithic      | charcoal               | ANU-5485      | 3410  | 110   | 3410±110  | 2020       | 1450        | 1735   | 2020-1450 cal. BC  | Regarded as lower limit of probable date range                                                                                                                                                                                                                                                                                                         | Rice from layer 10 (Thompson 1996)                                                                                                                                                                      | Thompson (1996); Maloney and McAlister (1990)                              |
| Khok Phanom Di (Layer 10) | Thailand         | ໄທພູນຳ       | Neolithic      | charcoal               | ANU-5484      | 3280  | 140   | 3280±140  | 1930       | 1220        | 1575   | 1930-1220 cal. BC  | Possibly too young.                                                                                                                                                                                                                                                                                                                                    | Rice from layer 10 (Thompson 1996)                                                                                                                                                                      | Thompson (1996); Maloney and McAlister (1990)                              |
| Tongle Sap Lake (6 sites) | Cambodia         | វត្តសាប      | Neolithic      | charcoal               | R26608/3      | 73681 | 760   | 73681±760 | 2205       | 1887        | 2046   | 2205-1887 cal. BC  | The laboratory number given in Vanna (2002) is the submission number and not an NZA number as would normally be given. It is believed the uncalibrated date is likely to be 3681±60 BP which calibrates using the old IntCal 98 curve (as Vanna is likely to have used) at 2205-1887 cal. BC at 94.2% probability.                                     | Only Oryza on 6 sites                                                                                                                                                                                   | Vanna (2001; 2002)                                                         |
| Krek 52/62                | Cambodia         | ក្រេក ៥២/៦២  | Neolithic      | pottery organic temper | ETH-18972     | 3990  | 70    | 3990±70   | 2860       | 2280        | 2570   | 2860-2280 cal. BC  | Problems with discrepancy in the dates and with dating organics in a clay matrix are noted by Albrecht et al. (2006). Probably too early.                                                                                                                                                                                                              | Oryza                                                                                                                                                                                                   | Vincent (2003); Albrecht et al. (2001: 42)                                 |
| Krek 52/62                | Cambodia         | ក្រេក ៥២/៦២  | Neolithic      | pottery organic temper | ETH-18972     | 3495  | 75    | 3495±75   | 2030       | 1630        | 1830   | 2030-1630 cal. BC  | As above. This date is also seen as unreliable.                                                                                                                                                                                                                                                                                                        | Oryza                                                                                                                                                                                                   | Vincent (2003); Albrecht et al. (2001: 42)                                 |
| Rach Nui                  | Vietnam          |              | Neolithic      | charcoal               | SANU-31909    | 3310  | 30    | 3310±30   | 1660       | 1500        | 1580   | 1660-1500 cal. BC  | Seem as mainly hunter-gatherer-fisher subsistence with low frequencies of domesticates.                                                                                                                                                                                                                                                                | Oryza and Setaria                                                                                                                                                                                       | Oxenham et al. (2015); Castillo et al., in press                           |
| Rach Nui                  | Vietnam          | Rach Nui     | Neolithic      | charcoal               | SANU-31907    | 3260  | 35    | 3260±35   | 1620       | 1440        | 1530   | 1620-1440 cal. BC  | As above                                                                                                                                                                                                                                                                                                                                               | Oryza and Setaria                                                                                                                                                                                       | Oxenham et al. (2015); Castillo et al., in press                           |
| Rach Nui                  | Vietnam          | Rach Nui     | Neolithic      | charcoal               | SANU-31906    | 3250  | 30    | 3250±30   | 1620       | 1450        | 1535   | 1620-1450 cal. BC  | As above                                                                                                                                                                                                                                                                                                                                               | Oryza and Setaria                                                                                                                                                                                       | Oxenham et al. (2015); Castillo et al., in press                           |
| Rach Nui                  | Vietnam          | Rach Nui     | Neolithic      | charcoal               | SANU-31912    | 3250  | 30    | 3250±30   | 1620       | 1450        | 1535   | 1620-1450 cal. BC  | As above                                                                                                                                                                                                                                                                                                                                               | Oryza and Setaria                                                                                                                                                                                       | Oxenham et al. (2015); Castillo et al., in press                           |
| Rach Nui                  | Vietnam          | Rach Nui     | Neolithic      | charcoal               | SANU-31913    | 3245  | 30    | 3245±30   | 1610       | 1440        | 1525   | 1610-1440 cal. BC  | As above                                                                                                                                                                                                                                                                                                                                               | Oryza and Setaria                                                                                                                                                                                       | Oxenham et al. (2015); Castillo et al., in press                           |
| Rach Nui                  | Vietnam          | Rach Nui     | Neolithic      | charcoal               | SANU-31911    | 3230  | 35    | 3230±35   | 1610       | 1420        | 1515   | 1610-1420 cal. BC  | As above                                                                                                                                                                                                                                                                                                                                               | Oryza and Setaria                                                                                                                                                                                       | Oxenham et al. (2015); Castillo et al., in press                           |
| Rach Nui                  | Vietnam          | Rach Nui     | Neolithic      | charcoal               | SANU-30823    | 3200  | 35    | 3200±35   | 1600       | 1400        | 1500   | 1600-1400 cal. BC  | As above                                                                                                                                                                                                                                                                                                                                               | Oryza and Setaria                                                                                                                                                                                       | Oxenham et al. (2015); Castillo et al., in press                           |
| Rach Nui                  | Vietnam          | Rach Nui     | Neolithic      | charcoal               | SANU-30824    | 3190  | 40    | 3190±40   | 1610       | 1380        | 1595   | 1610-1380 cal. BC  | As above                                                                                                                                                                                                                                                                                                                                               | Oryza and Setaria                                                                                                                                                                                       | Oxenham et al. (2015); Castillo et al., in press                           |
| Rach Nui                  | Vietnam          | Rach Nui     | Neolithic      | charcoal               | SANU-30830    | 3190  | 45    | 3190±45   | 1610       | 1310        | 1460   | 1610-1310 cal. BC  | As above                                                                                                                                                                                                                                                                                                                                               | Oryza and Setaria                                                                                                                                                                                       | Oxenham et al. (2015); Castillo et al., in press                           |
| Rach Nui                  | Vietnam          | Rach Nui     | Neolithic      | charcoal               | SANU-31910    | 3190  | 30    | 3190±30   | 1520       | 1410        | 1465   | 1520-1410 cal. BC  | As above                                                                                                                                                                                                                                                                                                                                               | Oryza and Setaria                                                                                                                                                                                       | Oxenham et al. (2015); Castillo et al., in press                           |
| Rach Nui                  | Vietnam          | Rach Nui     | Neolithic      | charcoal               | SANU-30832    | 3190  | 35    | 3190±35   | 1510       | 1400        | 1465   | 1510-1400 cal. BC  | As above                                                                                                                                                                                                                                                                                                                                               | Oryza and Setaria                                                                                                                                                                                       | Oxenham et al. (2015); Castillo et al., in press                           |
| Rach Nui                  | Vietnam          | Rach Nui     | Neolithic      | charcoal               | SANU-30836    | 3165  | 30    | 3165±30   | 1530       | 1390        | 1450   | 1510-1390 cal. BC  | As above                                                                                                                                                                                                                                                                                                                                               | Oryza and Setaria                                                                                                                                                                                       | Oxenham et al. (2015); Castillo et al., in press                           |
| Rach Nui                  | Vietnam          | Rach Nui     | Neolithic      | charcoal               | SANU-30825    | 3160  | 35    | 3160±35   | 1510       | 1300        | 1405   | 1510-1300 cal. BC  | As above                                                                                                                                                                                                                                                                                                                                               | Oryza and Setaria                                                                                                                                                                                       | Oxenham et al. (2015); Castillo et al., in press                           |
| Rach Nui                  | Vietnam          | Rach Nui     | Neolithic      | charcoal               | SANU-30829    | 3150  | 40    | 3150±40   | 1510       | 1300        | 1405   | 1510-1300 cal. BC  | As above                                                                                                                                                                                                                                                                                                                                               | Oryza and Setaria                                                                                                                                                                                       | Oxenham et al. (2015); Castillo et al., in press                           |
| Rach Nui                  | Vietnam          | Rach Nui     | Neolithic      | charcoal               | SANU-30835    | 3130  | 30    | 3130±30   | 1500       | 1290        | 1395   | 1500-1290 cal. BC  | As above                                                                                                                                                                                                                                                                                                                                               | Oryza and Setaria                                                                                                                                                                                       | Oxenham et al. (2015); Castillo et al., in press                           |
| Rach Nui                  | Vietnam          | Rach Nui     | Neolithic      | charcoal               | SANU-30831    | 3130  | 35    | 3130±35   | 1500       | 1290        | 1395   | 1500-1290 cal. BC  | As above                                                                                                                                                                                                                                                                                                                                               | Oryza and Setaria                                                                                                                                                                                       | Oxenham et al. (2015); Castillo et al., in press                           |
| Rach Nui                  | Vietnam          | Rach Nui     | Neolithic      | charcoal               | SANU-30827    | 3125  | 35    | 3125±35   | 1500       | 1280        | 1390   | 1500-1280 cal. BC  | As above                                                                                                                                                                                                                                                                                                                                               | Oryza and Setaria                                                                                                                                                                                       | Oxenham et al. (2015); Castillo et al., in press                           |
| Rach Nui                  | Vietnam          | Rach Nui     | Neolithic      | charcoal               | SANU-30824    | 3085  | 35    | 3085±35   | 1430       | 1250        | 1340   | 1430-1250 cal. BC  | As above                                                                                                                                                                                                                                                                                                                                               | Oryza and Setaria                                                                                                                                                                                       | Oxenham et al. (2015); Castillo et al., in press                           |
| Rach Nui                  | Vietnam          | Rach Nui     | Neolithic      | charcoal               | SANU-30826    | 3080  | 35    | 3080±35   | 1430       | 1250        | 1340   | 1430-1250 cal. BC  | As above                                                                                                                                                                                                                                                                                                                                               | Oryza and Setaria                                                                                                                                                                                       | Oxenham et al. (2015); Castillo et al., in press                           |
| Rach Nui                  | Vietnam          | Rach Nui     | Neolithic      | charcoal (bulk)        | HNK-1777/3    | 3635  | 85    | 3635±85   | 2280       | 1750        | 2015   | 2280-1750 cal. BC  | 2003 excavations; no archaeological botanical data. As often with bulk charcoal dates contamination by older and younger material can be a problem.                                                                                                                                                                                                    | Oryza and Setaria                                                                                                                                                                                       | Oxenham et al. (2015); table S2                                            |
| Rach Nui                  | Vietnam          | Rach Nui     | Neolithic      | charcoal (bulk)        | HNK-1777/2    | 3545  | 85    | 3545±85   | 2140       | 1680        | 1900   | 2140-1680 cal. BC  | As above                                                                                                                                                                                                                                                                                                                                               | Oryza and Setaria                                                                                                                                                                                       | Oxenham et al. (2015); table S2                                            |
| Rach Nui                  | Vietnam          | Rach Nui     | Neolithic      | charcoal (bulk)        | HNK-1777/2    | 3320  | 100   | 3320±100  | 1890       | 1420        | 1655   | 1890-1420 cal. BC  | As above                                                                                                                                                                                                                                                                                                                                               | Oryza and Setaria                                                                                                                                                                                       | Oxenham et al. (2015); table S2                                            |
| Rach Nui                  | Vietnam          | Rach Nui     | Neolithic      | charcoal (bulk)        | HNK-177/2     | 3200  | 100   | 3200±100  | 1740       | 1220        | 1480   | 1740-1220 cal. BC  | As above                                                                                                                                                                                                                                                                                                                                               | Oryza and Setaria                                                                                                                                                                                       | Oxenham et al. (2015); table S2                                            |
| Rach Nui                  | Vietnam          | Rach Nui     | Neolithic      | charcoal (bulk)        | HNK-177/1     | 2560  | 130   | 2560±130  | 980        | 390         | 685    | 980-390 cal. BC    | As above                                                                                                                                                                                                                                                                                                                                               | Oryza and Setaria                                                                                                                                                                                       | Oxenham et al. (2015); table S2                                            |
| Rach Nui                  | Vietnam          | Rach Nui     | Neolithic      | charcoal (bulk)        | HNK-177/1     | 2430  | 50    | 2430±50   | 760        | 400         | 580    | 760-400 cal. BC    | As above                                                                                                                                                                                                                                                                                                                                               | Oryza and Setaria                                                                                                                                                                                       | Oxenham et al. (2015); table S2                                            |
| <b>RUSSIA - FAR EAST</b>  |                  |              |                |                        |               |       |       |           |            |             |        |                    |                                                                                                                                                                                                                                                                                                                                                        |                                                                                                                                                                                                         |                                                                            |
| Krounovka-1               | Russian Far East | Круновка     | Krounovsky     | unknown                | NUTA-5643     | 4671  | 31    | 4671±31   | 3630       | 3360        | 3495   | 3630-3360 cal. BC  | As above                                                                                                                                                                                                                                                                                                                                               | Panicum millicecum, Perilla and 71x Setaria, gathered plants were well represented                                                                                                                      | Sergushcheva and Vostretsov, (2009)                                        |
| Krounovka-1               | Russian Far East | Круновка     | Neolithic      | unknown                | Beta-171662   | 4640  | 40    | 4640±40   | 3620       | 3350        | 3485   | 3620-3350 cal. BC  | As above                                                                                                                                                                                                                                                                                                                                               | As above                                                                                                                                                                                                | Sergushcheva and Vostretsov, (2009)                                        |
| Zaisanovka-1              | Russian Far East | Зайсановка-1 | Zaisanovsky    | unknown                | NUTA-5282     | 4010  | 44    | 4010±44   | 2840       | 2400        | 2620   | 2840-2400 cal. BC  | As above                                                                                                                                                                                                                                                                                                                                               | Setaria. Grains very small                                                                                                                                                                              | Sergushcheva and Vostretsov, (2009)                                        |
| Zaisanovka-1              | Russian Far East | Зайсановка-1 | Zaisanovsky    | unknown                | NUTA-5483     | 3972  | 31    | 3972±31   | 2580       | 2340        | 2460   | 2580-2340 cal. BC  | As above                                                                                                                                                                                                                                                                                                                                               | As above                                                                                                                                                                                                | Sergushcheva and Vostretsov, (2009)                                        |
| Zaisanovka-7              | Russian Far East | Зайсановка-7 | Zaisanovsky    | No dates given         |               |       |       |           | 2800       | 2400        | 2600   | 2800-2400 cal. BC  | As above                                                                                                                                                                                                                                                                                                                                               | Possible impressions of Panicum in ceramics. Gathered foods are well represented but no remains of cultigens. However, agricultural tools are present.                                                  | Sergushcheva and Vostretsov, (2009)                                        |
| Novoselische-4            | Russian Far East | Новоселыше   | Zaisanovsky    | unknown                | AA-13400      | 3840  | 70    | 3840±70   | 2480       | 2040        | 2260   | 2480-2040 cal. BC  | As above                                                                                                                                                                                                                                                                                                                                               | Panicum                                                                                                                                                                                                 | Sergushcheva and Vostretsov, (2009)                                        |
| Novoselische-4            | Russian Far East | Новоселыше   | Zaisanovsky    | unknown                | AA-36748      | 3750  | 35    | 3750±35   | 2290       | 2030        | 2160   | 2290-2030 cal. BC  | As above                                                                                                                                                                                                                                                                                                                                               | Panicum                                                                                                                                                                                                 | Sergushcheva and Vostretsov, (2009)                                        |
| <b>KOREA</b>              |                  |              |                |                        |               |       |       |           |            |             |        |                    |                                                                                                                                                                                                                                                                                                                                                        |                                                                                                                                                                                                         |                                                                            |
| Neunggok                  | South Korea      | 능곡           | Middle Chulmun | Foxtail Millet         | Beta-252973   | 4740  | 40    | 4740±40   | 3640       | 3370        | 3505   | 3640-3370 cal. BC  | Direct date on millet. Earliest secure date.                                                                                                                                                                                                                                                                                                           | Panicum & Setaria*1                                                                                                                                                                                     | Lee G. A. (2011; table 1)                                                  |
| Daechon-ri                | South Korea      | 대천리          | Middle Chulmun | Charred wood           | SNU-267       | 4590  | 70    | 4590±70   | 3630       | 3090        | 3360   | 3630-3090 cal. BC  | Uncharred rice, along with barley and wheat, were recovered from this site and therefore it's antiquity is questionable and potentially more recent (see Crawford and Lee 2003; Ahn 2010).                                                                                                                                                             | Panicum, Setaria, uncharred Oryza likely to be contaminant                                                                                                                                              | Han et al. (2003); Lee (2009; 2011); Ahn (2010)                            |
| Daechon-ri                | South Korea      | 대천리          | Middle Chulmun | Charred wood           | SNU-268       | 4490  | 40    | 4490±40   | 3360       | 3020        | 3190   | 3360-3020 cal. BC  | As above                                                                                                                                                                                                                                                                                                                                               | Panicum, Setaria, *Oryza (as above)                                                                                                                                                                     | Han et al. (2003); Lee (2009; 2011); Ahn (2010)                            |
| Daechon-ri                | South Korea      | 대천리          | Middle Chulmun | Charred wood           | SNU-263       | 4400  | 60    | 4400±60   | 3340       | 2900        | 3120   | 3340-2900 cal. BC  | As above                                                                                                                                                                                                                                                                                                                                               | Panicum, Setaria, *Oryza (as above)                                                                                                                                                                     | Han et al. (2003); Lee (2009; 2011); Ahn (2010)                            |
| Daechon-ri                | South Korea      | 대천리          | Middle Chulmun | Charred wood           | SNU-269       | 4240  | 110   | 4240±110  | 3320       | 2490        | 2905   | 3320-2490 cal. BC  | As above                                                                                                                                                                                                                                                                                                                                               | Panicum, Setaria, *Oryza (as above)                                                                                                                                                                     | Han et al. (2003); Lee (2009; 2011); Ahn (2010)                            |
| Tongamdong (Dongam-Dong)  | South Korea      | 통감동          | Middle Chulmun | Foxtail millet         | TO-8783       | 4590  | 100   | 4590±100  | 3640       | 3020        | 3330   | 3640-3020 cal. BC  | Direct date on millet from house floor within 2000 excavations                                                                                                                                                                                                                                                                                         | Panicum, Setaria*1                                                                                                                                                                                      | Crawford and Lee (2003); Lee (2011; table 1)                               |
| Pyeonggyeongdo            | South Korea      | 평경영도         | Middle Chulmun | Broomcorn millet       | SNU-252972    | 4340  | 40    | 4340±40   | 3090       | 2890        | 2990   | 3090-2890 cal. BC  | Direct date on broomcorn millet                                                                                                                                                                                                                                                                                                                        | Panicum*1 & Setaria                                                                                                                                                                                     | Lee (2011; table 1)                                                        |
| Gahyeon-ri                | South Korea      | 가현리          | Middle Chulmun | Peat                   | KSU-no number | 3890  | 30    | 3890±30   | 2470       | 2290        | 2380   | 2470-2290 cal. BC  | This date is reported in Ahn (2010) as 4010±25, in Choe and Bale (2002) as 4020±25 and in Lee (2011) as 3890 ±30 BP. Lee (2011) references Kang et al. (1993) who recalibrated Korean dates. This has not been seen but it is suspected the date was corrected by Kang et al. from a 5570 half-life.                                                   | Oryza & Setaria. Waterlogged and recovered and dated from peat. Therefore as with other sites in this region from which rice has been recovered from peat this may be natural wild rice (see Ahn 2010). | Im (1990); Ahn (2010); Lee (2011); Kang et al. 2011; Choe and Bale (2002)  |
| Gawaj/Kawaj (Isan 2)      | South Korea      | 가와지          | Middle Chulmun | Peat                   | Beta-45536    | 4330  | 80    | 4330±80   | 3340       | 2690        | 3015   | 3340-2690 cal. BC  | Ahn (2010) cites these two further cases of earlier C14 dates rice husks in peat near Gahyeon-ri. However as Ahn states in neither case were these rice husks associated with archaeological material and therefore are likely of wild rice. As such the evidence from all these sites cannot be used to support the cultivation of rice at this date. | Oryza. May be wild see comment                                                                                                                                                                          | Ahn (2010)                                                                 |
| Seongjeo-ri (Isan 1)      | South Korea      | 성저리          | Middle Chulmun | Peat                   | Beta-48484    | 4070  | 80    | 4070±80   | 2890       | 2460        | 2675   | 2890-2460 cal. BC  | Ahn (2010) cites these two further cases of earlier C14 dates rice husks in peat near Gahyeon-ri. However as Ahn states in neither case were these rice husks associated with archaeological material and therefore are likely of wild rice. As such the evidence from all these sites cannot be used to support the cultivation of rice at this date. | Oryza. May be wild see comment                                                                                                                                                                          | Ahn (2010)                                                                 |
| Maean-ri                  | North Korea      | 마산리          | Middle Chulmun | No C14 dates           |               |       |       |           | 3500       | 2000        | 2750   | est. 3500-2000 BC  | As with Ilap-ri it is unclear exactly how well identified this material is.                                                                                                                                                                                                                                                                            | Setaria italica                                                                                                                                                                                         | Alpers and Lee (2014)                                                      |
| Ilap-ri                   | North Korea      | 지발리          | Middle Chulmun | No C14 dates           |               |       |       |           | 3500       | 2000        | 2750   | est. 3500-2000 BC  | Some serious problems as to authenticity and identifications of plant finds from this site (see Lee 2011; Kim 2014)                                                                                                                                                                                                                                    | Possible Setaria italica. Maybe barnyard millet?                                                                                                                                                        | Yoon Seo Suk (2001); Do and Hwang (1961); Kim (2014); Choe and Bale (2002) |
| Qun 1                     | South Korea      | 오촌 1         | Middle Chulmun | Foxtail millet         | TO-8607       | 4030  | 100   | 4030±100  | 2880       | 2290        | 2585   | 2880-2290 cal. BC  | Direct date on Setaria italica                                                                                                                                                                                                                                                                                                                         | Setaria italica                                                                                                                                                                                         | Ahn (2010); Lee (2011)                                                     |
| Qun 1                     | South Korea      | 오촌 1         | Early Mumun    | rice                   | TO-8605       | 3610  | 280   | 3610±280  | 2870       | 1310        | 2090   | 2870-1310 cal. BC  | Date on rice has a wide range that just falls outside further dates on rice and foxtail millet from same house [104] date SNU-125 (see Lee 2011) following Ahn (2010) the date should be dismissed as unreliable and rice farming in the Chulmun period is not yet confirmed                                                                           | Setaria italica; rice at this date is regared as unconfirmed and the radiocarbon date as unreliable.                                                                                                    | Ahn (2010); Lee (2011)                                                     |
| Qun 1                     | South Korea      | 오촌 1         | Early Mumun    | rice                   | SNU-125       | 2850  | 60    | 2850±60   | 1210       | 850         | 1030   | 1210-850 cal. BC   | Earliest confirmed co-occurrence of rice and foxtail millet                                                                                                                                                                                                                                                                                            | Setaria italica, Oryza                                                                                                                                                                                  | Ahn (2010); Lee (2011)                                                     |
| Qun 1                     | South Korea      | 오촌 1         | Early Mumun    | Foxtail millet         | SNU-126       | 2830  | 60    | 2830±60   | 1200       | 830         | 1010   | 1200-830 cal. BC   | As above                                                                                                                                                                                                                                                                                                                                               | Setaria italica, Oryza                                                                                                                                                                                  | Ahn (2010); Lee (2011)                                                     |
| Qun 1                     | South Korea      | 오촌 1         | Early Mumun    | Foxtail millet         | TO-8637       | 2820  | 100   | 2820±100  | 1230       | 790         | 1010   | 1230-790 cal. BC   | As above                                                                                                                                                                                                                                                                                                                                               | Setaria italica, Oryza                                                                                                                                                                                  | Ahn (2010); Lee (2011)                                                     |
| Gyodong: House No. 1      | South Korea      | 교동           |                |                        |               |       |       |           |            |             |        |                    |                                                                                                                                                                                                                                                                                                                                                        |                                                                                                                                                                                                         |                                                                            |

| Site                      | Province    | Local Script | Culture                              | C14 Material                                                                                                        | Code        | Date | Error | Date     | Cal. Start | Cal. Finish | Median | Calibrated 2 sigma  | Comments                                                                                                                                                                                                                                                                                                                                                                                                                                                                                                                   | Crops                                                                | References                                                                                                                  |
|---------------------------|-------------|--------------|--------------------------------------|---------------------------------------------------------------------------------------------------------------------|-------------|------|-------|----------|------------|-------------|--------|---------------------|----------------------------------------------------------------------------------------------------------------------------------------------------------------------------------------------------------------------------------------------------------------------------------------------------------------------------------------------------------------------------------------------------------------------------------------------------------------------------------------------------------------------------|----------------------------------------------------------------------|-----------------------------------------------------------------------------------------------------------------------------|
| Bangja-ri: House No. 12   | South Korea | 간석리          | Early Mumun                          | rice                                                                                                                | SNJ-05-440  | 2790 | 80    | 2790±80  | 1110       | 810         | 960    | 1110-810 cal. BC    |                                                                                                                                                                                                                                                                                                                                                                                                                                                                                                                            | Oryza                                                                | Abn (2010).                                                                                                                 |
| Seogajim-ri: House KC-001 | South Korea | 송지리          | Early Mumun                          | rice                                                                                                                | SED-11-435  | 2720 | 20    | 2720±20  | 910        | 810         | 860    | 910-810 cal. BC     |                                                                                                                                                                                                                                                                                                                                                                                                                                                                                                                            | Oryza                                                                | Shoda (2010)                                                                                                                |
| <b>JAPAN</b>              |             |              |                                      |                                                                                                                     |             |      |       |          |            |             |        |                     |                                                                                                                                                                                                                                                                                                                                                                                                                                                                                                                            |                                                                      |                                                                                                                             |
| Nabatake                  | Japan       | 奈波           | Final Jomon/Yamanotera               |                                                                                                                     | Level 13    | 3000 | 80    | 3000±80  | 1430       | 1010        | 1220   | 1430-1010 cal. BC   | The site has good evidence for tools associated with cultivation, along with fields. It is generally seen as spanning the Yomoantera phase both attributed to the Final Jomon and the Initial Yayoi. As such the site could date anywhere between 800 BC to 400 BC, but more likely 500-400 BC (Kumar 2009). The C14 dates are therefore too early and are are inconsistent with the stratigraphy. Unfortunately it is unclear what material was dated e.g. peat, bulk charcoal etc. The dates are all seen as unreliable. | No charred cultigens were recovered from the lowest levels           | Crawford 1992 (citing Tosu-shi Kyoku linkai 1982); Kasahara (1982); Imamura (1996: 136); Takahashi (2009); Kumar (2009, 28) |
| Nabatake                  | Japan       | 奈波           | Final Jomon/Yamanotera               |                                                                                                                     | Level 10-11 | 4030 | 65    | 4030±65  | 2870       | 2340        | 2605   | 2870-2340 cal. BC   | As above. This much older date from a stratigraphically later level illustrates the problems with the dating on this site.                                                                                                                                                                                                                                                                                                                                                                                                 | No charred cultigens were recovered from the lowest levels           | Crawford 1992 (citing Tosu-shi Kyoku linkai 1982); Kasahara (1982); Imamura (1996: 136); Takahashi (2009); Kumar (2009, 28) |
| Nabatake                  | Japan       | 奈波           | Final Jomon/Yamanotera               |                                                                                                                     | Level 10-11 | 2680 | 80    | 2680±80  | 1050       | 550         | 800    | 1050-550 cal. BC    | While this and the date below do appear younger it is unknown if they are on different material to the other dates, or may suffer from similar problems                                                                                                                                                                                                                                                                                                                                                                    | Perilla seeds and a single Setaria and Oryza at Level 11, mung bean? | Crawford 1992 (citing Tosu-shi Kyoku linkai 1982); Kasahara (1982); Imamura (1996: 136); Takahashi (2009); Kumar (2009, 28) |
| Nabatake                  | Japan       | 奈波           | Final Jomon/pre-Yamanotera           |                                                                                                                     | Level 8     | 2620 | 60    | 2620±60  | 920        | 540         | 730    | 920-540 cal. BC     | As above                                                                                                                                                                                                                                                                                                                                                                                                                                                                                                                   | One rice grain, mung bean, Perilla                                   | Crawford 1992 (citing Tosu-shi Kyoku linkai 1982); Kasahara (1982)                                                          |
| Nabatake                  | Japan       | 奈波           | Final Jomon/pre-Yamanotera           |                                                                                                                     | Level 8     | 3230 | 100   | 3230±100 | 1750       | 1130        | 1505   | 1750-1130 cal. BC   | This date is older than dates stratigraphically below.                                                                                                                                                                                                                                                                                                                                                                                                                                                                     | As above                                                             | Crawford 1992 (citing Tosu-shi Kyoku linkai 1982); Kasahara (1982)                                                          |
| Nabatake                  | Japan       | 奈波           | Final Jomon/pre-Yamanotera           |                                                                                                                     | Level 8     | 2960 | 90    | 2960±90  | 1420       | 930         | 1175   | 1420-930 cal. BC    | Date was dismissed as too old                                                                                                                                                                                                                                                                                                                                                                                                                                                                                              | As above                                                             | Crawford 1992 (citing Tosu-shi Kyoku linkai 1982); Kasahara (1982)                                                          |
| Kuwagashimo               | Japan       | 桑刈下          | Late Jomon                           | No C14 dates                                                                                                        |             |      |       |          | 1500       | 1000        | 1250   | 1500-1000 cal. BC   | Two barley and Azuki beans, along with were also recorded from this site. The date of the site is estimated as Late Jomon. But given the presence of barley it is likely the material could be intrusive. The record should be dismissed.                                                                                                                                                                                                                                                                                  | Oryza carbonized grains; 2x Hordeum                                  | Hudson (1999, table 5.2); Kotani (1981); Nishida (1975); Crawford (1992)                                                    |
| Iraya III                 | Japan       | 板谷Ⅲ          | Late Jomon / Late Tottaimon          | Unknown if C14 dated. Uncalibrated date is our estimate from the calibrated date given in Nasu and Momohara (2016). | unknown     | 2850 | 50    | 2850±50  | 1200       | 890         | 1045   | 1200-890 cal. BC    | It is unclear if there is a C14 date for this site. The reported date is not thought reliable. The ceramic phasing (Tottimon 須布式) as with other records here is generally equated as Late Final Jomon/Early Yayoi and so at earliest between 800-400 BC.                                                                                                                                                                                                                                                                   | Oryza. Impressions within pottery                                    | Nasu and Momohara (2016)                                                                                                    |
| Kazahari                  | Japan       | カザハリ         | Final Jomon/ Tokoshina I             | rice grains                                                                                                         | TO-4086     | 2810 | 270   | 2810±270 | 1690       | 380         | 1035   | 1690-380 cal. BC    | The date ranges are very wide and the estimates could still place the date within the traditional framework. The likely date probably lies between 980-380 BC and would as such be the earliest site with rice, foxtrail and broomcorn millet. Although only one grain of Panicum was recovered.                                                                                                                                                                                                                           | Oryza, Setaria and single find of Panicum                            | D'Andrea (1995); D'Andrea et al. (1995)                                                                                     |
| Kazahari                  | Japan       | カザハリ         | Final Jomon/ Tokoshina I             | rice grains                                                                                                         | TO-2202     | 2540 | 240   | 2540±240 | 1280       | 50          | 665    | 1280-50 cal. BC     | As above                                                                                                                                                                                                                                                                                                                                                                                                                                                                                                                   | Panicum & Oryza                                                      | D'Andrea (1995); D'Andrea et al. (1995)                                                                                     |
| Ryugasaki 田賀              | Japan       | 竜夕崎A         | Final Jomon/pre-Yamanotera/ Nagahara | Panicum                                                                                                             | PLD-5304    | 2550 | 25    | 2550±25  | 810        | 550         | 680    | 810-550 cal. BC     | This is probably the earliest and most reliable dating for the introduction of agriculture to Japan. However neither foxtail millet nor rice has not been recovered from the site.                                                                                                                                                                                                                                                                                                                                         | Panicum                                                              | Miyata (2007); Obata (2011, 168 ); Miyata et al. (2007)                                                                     |
| Uenoharu                  | Japan       | 上野原          | Final Jomon/pre-Yamanotera           | No C14 dates                                                                                                        |             |      |       |          | 1000       | 300         | 650    | 1000-300 cal. BC    |                                                                                                                                                                                                                                                                                                                                                                                                                                                                                                                            | Oryza carbonized grains, pottery impressions                         | From Hudson (1999, table 5.2) citing Kotani 1972                                                                            |
| Eryoharu                  | Japan       | 阿留原          | Final Jomon/pre-Yamanotera           | No C14 dates                                                                                                        |             |      |       |          | 1000       | 300         | 650    | 1000-300 cal. BC    |                                                                                                                                                                                                                                                                                                                                                                                                                                                                                                                            | Oryza carbonized grains                                              | From Hudson (1999, table 5.2) citing Kagawa 1973                                                                            |
| Oishi                     | Japan       | 大石           | Final Jomon/pre-Yamanotera           | No C14 dates                                                                                                        |             |      |       |          | 1000       | 300         | 650    | 1000-300 cal. BC    | Has hoes and agricultural tools recorded. But date is uncertain.                                                                                                                                                                                                                                                                                                                                                                                                                                                           | Oryza carbonized grains, pottery impressions                         | From Hudson (1999, table 5.2) citing Kagawa 1972; Kagawa 1973                                                               |
| Kuretsukiharu             | Japan       | 黒石原          | Final Jomon/pre-Yamanotera           | No C14 dates                                                                                                        |             |      |       |          | 1000       | 300         | 650    | 1000-300 cal. BC    |                                                                                                                                                                                                                                                                                                                                                                                                                                                                                                                            | Oryza carbonized grains, pottery impressions                         | From Hudson (1999, table 5.2) citing Furuta 1972                                                                            |
| Yonetake                  | Japan       | 米竹 大分        | Yayoi Period                         | rice                                                                                                                | PLD-5104    | 2235 | 20    | 2235±20  | 390        | 200         | 295    | 390-200 cal. BC     | Reliable dating but would be thought of at the end of the transition to rice/millet agriculture in Japan.                                                                                                                                                                                                                                                                                                                                                                                                                  | Panicum & Oryza                                                      | Nishimoto (2007); Obata (2011,186-187)                                                                                      |
| Yonetake                  | Japan       | 米竹 大分        | Yayoi Period                         | Panicum                                                                                                             | PLD-5106    | 2230 | 20    | 2230±20  | 380        | 200         | 290    | 380-200 cal. BC     | as above                                                                                                                                                                                                                                                                                                                                                                                                                                                                                                                   | Panicum & Oryza                                                      | Nishimoto (2007); Obata (2011,186-187)                                                                                      |
| Ukikunden                 | Japan       | 宇木渡田         | Yu'usu - Final Jomon - Initial Yayoi | charcoal                                                                                                            | Kur-0054    | 2240 | 50    | 2240±50  | 400        | 150         | 275    | 400-150 cal. BC     | Site has Yu'usu style pottery. The date seems slightly later but is thought reliable                                                                                                                                                                                                                                                                                                                                                                                                                                       | Oryza. Rice husks reported from shell layers                         | Kagawa (1973); Hudson (1999, table 5.5)                                                                                     |
| Ukikunden                 | Japan       | 宇木渡田         | Yu'usu - Final Jomon - Initial Yayoi | shell                                                                                                               | Kur-0053    | 2370 | 50    | 2370±50  | 370        | -60         | 155    | 370 cal. BC - 60 AD | Date corrected for the marine reservoir effect using Marine13 curve (ΔR = 84±72). The correction brings this date within the range of the charcoal date.                                                                                                                                                                                                                                                                                                                                                                   | Oryza. Rice husks reported from shell layers                         | Kagawa (1973); Hudson (1999, table 5.5)                                                                                     |
| Shimogouri                | Japan       | 下郡 大分        | Yayoi Period                         | rice                                                                                                                | PLD-5109    | 2185 | 25    | 2185±25  | 360        | 170         | 265    | 360-170 cal. BC     | As with Yonetake these are the earliest reliable dates for foxtail millet and rice together, but are likely to lie towards the end of the transition.                                                                                                                                                                                                                                                                                                                                                                      | Setaria & Oryza                                                      | Nishimoto (2007); Obata (2011,186-187)                                                                                      |
| Shimogouri                | Japan       | 下郡 大分        | Yayoi Period                         | Setaria Italica                                                                                                     | PLD-6466    | 2185 | 35    | 2185±35  | 370        | 160         | 265    | 370-160 cal. BC     | As above                                                                                                                                                                                                                                                                                                                                                                                                                                                                                                                   | Setaria & Oryza                                                      | Nishimoto (2007); Obata (2011,186-187)                                                                                      |
| Shimogouri                | Japan       | 下郡 大分        | Yayoi Period                         | rice                                                                                                                | PLD-6463    | 2175 | 30    | 2175±30  | 370        | 120         | 245    | 370-120 cal. BC     | As above                                                                                                                                                                                                                                                                                                                                                                                                                                                                                                                   | Setaria & Oryza                                                      | Nishimoto (2007); Obata (2011,186-187)                                                                                      |
| Shimogouri                | Japan       | 下郡 大分        | Yayoi Period                         | rice                                                                                                                | PLD-5111    | 2165 | 20    | 2165±20  | 360        | 120         | 240    | 360-120 cal. BC     | As above                                                                                                                                                                                                                                                                                                                                                                                                                                                                                                                   | Setaria & Oryza                                                      | Nishimoto (2007); Obata (2011,186-187)                                                                                      |
| Shimogouri                | Japan       | 下郡 大分        | Yayoi Period                         | ?                                                                                                                   | PLD-5110    | 2160 | 20    | 2160±20  | 360        | 110         | 235    | 360-110 cal. BC     | As above                                                                                                                                                                                                                                                                                                                                                                                                                                                                                                                   | Setaria & Oryza                                                      | Nishimoto (2007); Obata (2011,186-187)                                                                                      |
| Shimogouri                | Japan       | 下郡 大分        | Yayoi Period                         | rice                                                                                                                | PLD-6461    | 2140 | 35    | 2140±35  | 360        | 50          | 205    | 360-50 cal. BC      | As above                                                                                                                                                                                                                                                                                                                                                                                                                                                                                                                   | Setaria & Oryza                                                      | Nishimoto (2007); Obata (2011,186-187)                                                                                      |
| Shimogouri                | Japan       | 下郡 大分        | Yayoi Period                         | rice                                                                                                                | PLD-6459    | 2125 | 35    | 2125±35  | 360        | 40          | 200    | 360-40 cal. BC      | As above                                                                                                                                                                                                                                                                                                                                                                                                                                                                                                                   | Setaria & Oryza                                                      | Nishimoto (2007); Obata (2011,186-187)                                                                                      |
| Shimogouri                | Japan       | 下郡 大分        | Yayoi Period                         | rice                                                                                                                | PLD-9492    | 2125 | 35    | 2125±35  | 360        | 40          | 200    | 360-40 cal. BC      | As above                                                                                                                                                                                                                                                                                                                                                                                                                                                                                                                   | Setaria & Oryza                                                      | Nishimoto (2007); Obata (2011,186-187)                                                                                      |
| Shimogouri                | Japan       | 下郡 大分        | Yayoi Period                         | rice                                                                                                                | PLD-6458    | 2080 | 35    | 2080±35  | 200        | 1           | 100.5  | 200-1 cal. BC       | As above                                                                                                                                                                                                                                                                                                                                                                                                                                                                                                                   | Setaria & Oryza                                                      | Nishimoto (2007); Obata (2011,186-187)                                                                                      |
| Shimogouri                | Japan       | 下郡 大分        | Yayoi Period                         | rice                                                                                                                | PLD-6460    | 2080 | 35    | 2080±35  | 200        | 1           | 100.5  | 200-1 cal. BC       | As above                                                                                                                                                                                                                                                                                                                                                                                                                                                                                                                   | Setaria & Oryza                                                      | Nishimoto (2007); Obata (2011,186-187)                                                                                      |
